# Supplementary material
Source: PubMed Central journal article supplement (PMC7095445)
Supplement: 41586_2008_BFnature06536_MOESM305_ESM.pdf [file 41586_2008_BFnature06536_MOESM305_ESM.pdf]

**Jones *et al.* Global trends in emerging infectious diseases****Supplementary Information****List of Contents**

|                                                                                                    |           |
|----------------------------------------------------------------------------------------------------|-----------|
| <b>1. Supplementary Data.</b> EID Event Database                                                   | <b>2</b>  |
| 1.1. Supplementary Table 1                                                                         | 2         |
| 1.2. Source Details                                                                                | 6         |
| 1.3. Comparison to Other Variable Definitions, Supplementary Table 2                               | 37        |
| <br>                                                                                               |           |
| <b>2. Supplementary Figure 1</b>                                                                   | <b>39</b> |
| Latitudinal gradient in EID events.                                                                |           |
| <br>                                                                                               |           |
| <b>3. Supplementary Figure 2</b>                                                                   | <b>40</b> |
| Global richness maps of EID events from 1940-2004 split by category.                               |           |
| <br>                                                                                               |           |
| <b>4. Supplementary Table 3</b>                                                                    | <b>41</b> |
| Socio-economic, environmental and ecological correlates of EID events for 10 random spatial draws. |           |
| <br>                                                                                               |           |
| <b>5. Supplementary Figure 3</b>                                                                   | <b>45</b> |
| Spatial reporting bias in EID events                                                               |           |

## 1.1. Supplementary Table 1.

| Pathogen responsible for each EID event             | Year | PathType   | TranType | ZooType | DrugRes | TranMode | Driver                              | Location                                                                    | Sources                                     |
|-----------------------------------------------------|------|------------|----------|---------|---------|----------|-------------------------------------|-----------------------------------------------------------------------------|---------------------------------------------|
| <i>Acinetobacter baumannii</i> gentamycin-res       | 1993 | bacteria   | 0        | 0       | 1       | 0        | Antimicrobial agent use             | Australia (Sir Charles Gairdner Hospital, Perth)                            | [75][76][77][138][512]                      |
| <i>Acinetobacter baumannii</i> imipenem-res         | 1985 | bacteria   | 0        | 0       | 1       | 0        | Antimicrobial agent use             | UK (Edinburgh Royal Infirmary Ecosse, Edinburgh)                            | [29][75][77][459]                           |
| <i>Acinetobacter baumannii</i> multiple drug-res    | 1998 | bacteria   | 0        | 0       | 1       | 0        | Antimicrobial agent use             | Taiwan (National Taiwan University Hospital, T'ai-pei)                      | [75][77][278]                               |
| <i>Acinetobacter baumannii</i> polymixin-res        | 2001 | bacteria   | 0        | 0       | 1       | 0        | Antimicrobial agent use             | US (New York Hospital Medical Center of Queens, New York)                   | [75][77][631]                               |
| Alkhurma virus                                      | 1995 | virus      | 1        | 1       | 0       | 1        | International travel & commerce     | Saudi Arabia (Jiddah)                                                       | [235][680]                                  |
| Andes virus                                         | 1995 | virus      | 1        | 2       | 0       | 0        | Land use changes                    | Argentina (El Bolson, Provincia de Rio Negro)                               | [236][609]                                  |
| <i>Angiostrongylus cantonensis</i>                  | 1945 | protozoa   | 1        | 2       | 0       | 0        | International travel & commerce     | Taiwan                                                                      | [70][457][487]                              |
| <i>Anisakis simplex</i>                             | 1955 | helminths  | 1        | 2       | 0       | 0        | Human demographics & behavior       | Netherlands                                                                 | [183][197][336][384][609]                   |
| Australian bat lyssavirus                           | 1996 | virus      | 1        | 2       | 0       | 0        | Land use changes                    | Australia (Rockhampton)                                                     | [35][193][609]                              |
| B19 virus                                           | 1974 | virus      | 0        | 0       | 0       | 0        | Unspecified                         | UK (London)                                                                 | [142][270][579][609]                        |
| <i>Babesia divergens</i>                            | 1957 | protozoa   | 1        | 1       | 0       | 1        | Land use changes                    | Slovenia, Croatia, BosniaHert, Montenegro&Serbia, Macedonia                 | [269]                                       |
| <i>Babesia microti</i>                              | 1969 | protozoa   | 1        | 2       | 0       | 1        | Land use changes                    | US (Nantucket, Massachusetts)                                               | [336][609][656]                             |
| <i>Babesia microti</i> -like                        | 1956 | protozoa   | 1        | 2       | 0       | 1        | Human susceptibility to infection   | Croatia (Strmec)                                                            | [321][483][570]                             |
| <i>Babesia microti</i> -like WA1-type               | 1991 | protozoa   | 1        | 2       | 0       | 1        | Human susceptibility to infection   | US (Washington)                                                             | [321][483]                                  |
| <i>Bacillus anthracis</i>                           | 1979 | bacteria   | 1        | 2       | 0       | 0        | Medical industry changes            | Russia (Yekaterinburg)                                                      | [393][609]                                  |
| <i>Balamuthia mandrillaris</i>                      | 1990 | protozoa   | 1        | 2       | 0       | 0        | Human susceptibility to infection   | US (Kings County Hospital Center, New York)                                 | [50][98][508][640]                          |
| Banna                                               | 1985 | virus      | 1        | 3       | 0       | 1        | Medical industry changes            | China (Xishuang Banna, Yunnan Province)                                     | [128][315][609][675]                        |
| Barmah forest                                       | 1985 | virus      | 1        | 2       | 0       | 1        | International travel & commerce     | Australia (Griffith, New South Wales)                                       | [96][260][346][609]                         |
| <i>Bartonella bacilliformis</i>                     | 1987 | bacteria   | 0        | 0       | 0       | 1        | War & famine                        | Ecuador (Pajan)                                                             | [40][85]                                    |
| <i>Bartonella bacilliformis</i> chloramphenicol-res | 1988 | bacteria   | 0        | 0       | 1       | 1        | Antimicrobial agent use             | Peru                                                                        | [85]                                        |
| <i>Bartonella elizabethae</i>                       | 1986 | bacteria   | 1        | 2       | 0       | 0        | Human susceptibility to infection   | US (St. Elizabeth's Hospital, Brighton, Massachusetts)                      | [140][149][373][534][645]                   |
| <i>Bartonella henselae</i>                          | 1987 | bacteria   | 1        | 1       | 0       | 0        | Human susceptibility to infection   | US (Oklahoma City, Oklahoma)                                                | [333][571][579]                             |
| <i>Bartonella quintana</i>                          | 1949 | bacteria   | 0        | 0       | 0       | 1        | War & famine                        | Poland                                                                      | [85][326][638]                              |
| <i>Bordetella pertussis</i>                         | 1982 | bacteria   | 0        | 0       | 0       | 0        | Medical industry changes            | US                                                                          | [68][310][566][609]                         |
| <i>Borelia burgdorferi</i>                          | 1962 | bacteria   | 1        | 2       | 0       | 1        | Land use changes                    | US (Barnstable, Massachusetts)                                              | [14][238][336][590][591][609]               |
| <i>Brachiola vesicularum</i>                        | 1998 | protozoa   | 0        | 0       | 0       | 0        | Human susceptibility to infection   | Czech Republic (Praha)                                                      | [109][539]                                  |
| <i>Brucella melitensis</i>                          | 1995 | bacteria   | 1        | 2       | 0       | 0        | Agricultural industry changes       | Malta and Gozo                                                              | [41][609]                                   |
| <i>Burkholderia cepacia</i>                         | 1981 | bacteria   | 0        | 0       | 0       | 0        | Human susceptibility to infection   | Canada (Toronto, Province d'Ontario)                                        | [21][21][517][601][616]                     |
| <i>Burkholderia pseudomallei</i>                    | 1985 | bacteria   | 1        | 2       | 0       | 0        | War & famine                        | Vietnam (Cu Chi)                                                            | [13][256]                                   |
| California encephalitis                             | 1945 | virus      | 1        | 2       | 0       | 1        | Land use changes                    | US (San Joaquin, California)                                                | [234][249][336][355][609]                   |
| Campylobacter fetus                                 | 1945 | bacteria   | 1        | 2       | 0       | 0        | Human susceptibility to infection   | France (Basse-Normandie)                                                    | [90][609][639]                              |
| Campylobacter jejuni                                | 1967 | bacteria   | 1        | 2       | 0       | 0        | Medical industry changes            | US (Boston, Massachusetts; Minneapolis, Minnesota; Los Angeles, California) | [36][317][336][673][609]                    |
| Campylobacter jejuni fluoroquinolone-res            | 1986 | bacteria   | 1        | 2       | 1       | 0        | Agricultural industry changes       | Switzerland (Zurich)                                                        | [28][38][179][180][282][292][427][471][609] |
| <i>Candida albicans</i>                             | 1981 | fungi      | 1        | 3       | 0       | 0        | Human susceptibility to infection   | US (UCLA Medical Center, Los Angeles, California)                           | [43][224][609]                              |
| <i>Candida albicans</i> fluconazole-res             | 1985 | fungi      | 1        | 3       | 1       | 0        | Antimicrobial agent use             | UK (London)                                                                 | [576][609]                                  |
| <i>Candida albicans</i> ketoconazole-res            | 1981 | fungi      | 1        | 3       | 1       | 0        | Antimicrobial agent use             | US (Denver, Colorado)                                                       | [274][534][562][609]                        |
| <i>Candida albicans</i> micronazole-res             | 1977 | fungi      | 1        | 3       | 1       | 0        | Antimicrobial agent use             | UK (Carshalton)                                                             | [268][609][644]                             |
| <i>Candida glabrata</i> fluconazole-res             | 1988 | fungi      | 1        | 3       | 1       | 0        | Antimicrobial agent use             | UK (Bristol)                                                                | [609][739]                                  |
| <i>Candida krusei</i>                               | 1977 | fungi      | 1        | 3       | 1       | 0        | Antimicrobial agent use             | US (Johns Hopkins Medical Center, Baltimore, Maryland)                      | [24][272][392][609]                         |
| <i>Candida tropicalis</i>                           | 1974 | fungi      | 1        | 3       | 0       | 0        | Human susceptibility to infection   | US (Memorial Sloan-Kettering, New York, New York)                           | [24][394][668]                              |
| Chikungunya                                         | 1952 | virus      | 1        | 2       | 0       | 1        | Human demographics & behavior       | Tanzania (Lindi; Mtwara; Ruvuma)                                            | [238][306][336][609]                        |
| <i>Chlamydia pneumoniae</i> TWAR strain             | 1965 | bacteria   | 0        | 0       | 0       | 0        | Unspecified                         | Taiwan                                                                      | [231][336]                                  |
| <i>Chlamydia trachomatis</i> pandrug-res            | 1997 | bacteria   | 0        | 0       | 1       | 0        | Antimicrobial agent use             | US (Atlanta, Georgia)                                                       | [583][609]                                  |
| <i>Clostridium botulinum</i>                        | 1976 | bacteria   | 1        | 2       | 0       | 0        | Food industry changes               | US (California)                                                             | [49][398][609]                              |
| <i>Clostridium difficile</i>                        | 1973 | bacteria   | 1        | 1       | 0       | 0        | Human susceptibility to infection   | US (Saint Louis, US)                                                        | [66][212][336][609][611]                    |
| <i>Clostridium difficile</i> clindamycin-resistance | 1989 | bacteria   | 0        | 0       | 1       | 0        | Antimicrobial agent use             | US (Albany, New York)                                                       | [429][609]                                  |
| <i>Coccidioides immitis</i>                         | 1990 | fungi      | 1        | 2       | 0       | 0        | Climate & weather                   | US (Kern County, California)                                                | [24][450][609]                              |
| <i>Corynebacterium diphtheriae</i>                  | 1985 | bacteria   | 0        | 0       | 0       | 0        | Breakdown of public health measures | Russia (Smolensk)                                                           | [503][609]                                  |
| <i>Corynebacterium jeikeium</i>                     | 1970 | bacteria   | 0        | 0       | 0       | 0        | Human susceptibility to infection   | US (Cornell Medical Center, New York, New York)                             | [76][288][301]                              |
| <i>Corynebacterium jeikeium</i> cipro-res           | 1987 | bacteria   | 0        | 0       | 1       | 0        | Antimicrobial agent use             | UK (Belfast)                                                                | [422]                                       |
| <i>Coxiella burnetii</i>                            | 1940 | rickettsia | 1        | 2       | 0       | 0        | War & famine                        | Slovenia, Croatia, BosniaHerz, Serbia&Montenegro, Albania, Macedonia        | [140][549]                                  |
| Crimean-Congo Hemorrhagic Fever                     | 1944 | virus      | 1        | 2       | 0       | 1        | War & famine                        | Ukraine (Crimea)                                                            | [304][333][336][609][649]                   |
| <i>Cryptococcus neoformans</i>                      | 1950 | fungi      | 1        | 2       | 0       | 0        | Human susceptibility to infection   | Congo (Lubumbashi)                                                          | [336][406][597][609]                        |
| <i>Cryptosporidium parvum</i>                       | 1974 | protozoa   | 1        | 1       | 0       | 0        | Land use changes                    | US (Olympia, Washington)                                                    | [336][391][435][609]                        |
| <i>Cyclospora cayentanensis</i>                     | 1977 | protozoa   | 1        | 3       | 0       | 0        | Human susceptibility to infection   | Papua New Guinea (Finschhafen)                                              | [25][56][609]                               |
| Dengue                                              | 1954 | virus      | 1        | 2       | 0       | 1        | War & famine                        | Philippines (Angeles City, Manila)                                          | [14][237][250][336][582][609]               |
| Ebola virus (Sudan)                                 | 1976 | virus      | 1        | 2       | 0       | 0        | Bushmeat                            | Sudan (Nzara)                                                               | [8][704][721][737][738]                     |
| <i>Echinococcus granulosus</i>                      | 1971 | helminths  | 1        | 2       | 0       | 0        | Breakdown of public health measures | Bulgaria                                                                    | [174][175][609]                             |
| <i>Ehrlichia canis</i>                              | 1993 | rickettsia | 1        | 1       | 0       | 1        | Land use changes                    | US (Gurdon, Arkansas)                                                       | [336][364]                                  |
| <i>Ehrlichia chaffeensis</i>                        | 1990 | rickettsia | 1        | 2       | 0       | 1        | Land use changes                    | US (Fort Chaffee, Arkansas)                                                 | [481][566][336][387][609]                   |
| <i>Ehrlichia equi</i>                               | 1990 | rickettsia | 1        | 2       | 0       | 1        | Land use changes                    | US (Duluth, Minnesota)                                                      | [63][333][609]                              |
| <i>Ehrlichia ewingii</i>                            | 1996 | rickettsia | 1        | 2       | 0       | 1        | Human susceptibility to infection   | US (Missouri)                                                               | [106][140][609]                             |
| <i>Ehrlichia phagocytophila</i>                     | 1990 | rickettsia | 1        | 2       | 0       | 1        | Land use changes                    | US (Duluth, Minnesota)                                                      | [63][127][140][333]                         |
| <i>Ehrlichia sennetsu</i>                           | 1953 | rickettsia | 1        | 1       | 0       | 1        | International travel & commerce     | Japan (Kushima Island)                                                      | [401][600]                                  |
| <i>Encephalitozoon cuniculi</i>                     | 1987 | protozoa   | 1        | 2       | 0       | 0        | Human susceptibility to infection   | Switzerland (Geneva)                                                        | [609][684]                                  |
| <i>Encephalitozoon hellem</i>                       | 1990 | protozoa   | 1        | 2       | 0       | 0        | Human susceptibility to infection   | US (Texas; New York)                                                        | [164][540][609]                             |
| <i>Encephalitozoon intestinalis</i>                 | 1990 | protozoa   | 0        | 0       | 0       | 0        | Human susceptibility to infection   | US (Newark, New Jersey)                                                     | [143][441][442][609]                        |
| <i>Enterococcus faecalis</i> gent-res               | 1978 | bacteria   | 1        | 1       | 1       | 0        | Agricultural industry changes       | France (Paris)                                                              | [273][423][587][609]                        |
| <i>Enterococcus faecalis</i> vanc-res               | 1986 | bacteria   | 1        | 1       | 1       | 0        | Agricultural industry changes       | UK (King's College Hospital, Dulwich, London)                               | [343][425][609][632]                        |
| <i>Enterococcus faecium</i> amp-res                 | 1989 | bacteria   | 1        | 1       | 1       | 0        | Agricultural industry changes       | US (Boston, Massachusetts)                                                  | [230][425][609][674]                        |
| <i>Enterococcus faecium</i> gent-res                | 1986 | bacteria   | 1        | 1       | 1       | 0        | Antimicrobial agent use             | US (Children's Hospital Medical Center, Boston, Massachusetts)              | [177][282][609]                             |
| <i>Enterococcus faecium</i> linezolid-res           | 2000 | bacteria   | 1        | 1       | 1       | 0        | Agricultural industry changes       | US (Chicago, Illinois)                                                      | [221][425][609]                             |
| <i>Enterococcus faecium</i> pen-res                 | 1989 | bacteria   | 1        | 1       | 1       | 0        | Antimicrobial agent use             | US (Philadelphia, Pennsylvania)                                             | [107][282][343][609]                        |
| <i>Enterococcus faecium</i> vanc-res                | 1986 | bacteria   | 1        | 1       | 1       | 0        | Agricultural industry changes       | UK (King's College Hospital, Dulwich, London)                               | [335][343][425][609][632]                   |
| <i>Enterocytozoon bienersi</i>                      | 1985 | protozoa   | 1        | 1       | 0       | 0        | Human susceptibility to infection   | Haiti                                                                       | [143][162][609]                             |
| Enterovirus 70                                      | 1969 | virus      | 0        | 0       | 0       | 0        | Unspecified                         | Ghana (Accra)                                                               | [20][126]                                   |
| Enterovirus 71                                      | 1974 | virus      | 0        | 0       | 0       | 0        | Unspecified                         | US (California)                                                             | [145][302][345][538]                        |
| <i>Escherichia coli</i> non-O157:H7                 | 1992 | bacteria   | 1        | 2       | 0       | 0        | Food industry changes               | Italy (Lombardia)                                                           | [111][144][609]                             |
| <i>Escherichia coli</i> O103:H2                     | 1980 | bacteria   | 1        | 2       | 0       | 0        | Food industry changes               | UK                                                                          | [81][144][168][308][374][605][609]          |
| <i>Escherichia coli</i> O104:H2                     | 1984 | bacteria   | 1        | 2       | 0       | 0        | Food industry changes               | UK (Oxford)                                                                 | [81][144][548][609]                         |
| <i>Escherichia coli</i> O104:H21                    | 1994 | bacteria   | 1        | 2       | 0       | 0        | Food industry changes               | US (Helena, Montana)                                                        | [13][81][144][609]                          |
| <i>Escherichia coli</i> O111:H-                     | 1953 | bacteria   | 1        | 2       | 0       | 0        | Food industry changes               | US (Fort Belvoir, Virginia)                                                 | [81][111][144][609]                         |
| <i>Escherichia coli</i> O111:H-                     | 1943 | bacteria   | 1        | 2       | 0       | 0        | Food industry changes               | UK (London)                                                                 | [99][144][609]                              |
| <i>Escherichia coli</i> O111:H2                     | 1980 | bacteria   | 1        | 2       | 0       | 0        | Food industry changes               | Australia (Subiaco)                                                         | [81][144][239][414][609]                    |

|                                                                      |      |           |   |   |   |   |                                   |                                                                                      |                                                      |
|----------------------------------------------------------------------|------|-----------|---|---|---|---|-----------------------------------|--------------------------------------------------------------------------------------|------------------------------------------------------|
| Escherichia coli O11:H8                                              | 1985 | bacteria  | 1 | 2 | 0 | 0 | Food industry changes             | Germany (Saarbrücken)                                                                | [74][81][82][144][609]                               |
| Escherichia coli O11:H12                                             | 1984 | bacteria  | 1 | 2 | 0 | 0 | Food industry changes             | Peru                                                                                 | [81][144][609][662]                                  |
| Escherichia coli O11:H16                                             | 1990 | bacteria  | 1 | 2 | 0 | 0 | Food industry changes             | Germany (Bayern; Nordrhein-westfalen; Schleswig-Holstein)                            | [83][609][662]                                       |
| Escherichia coli O11:H2                                              | 1996 | bacteria  | 1 | 2 | 0 | 0 | Food industry changes             | Japan (Komatsu, Ishikawa-ken)                                                        | [257][609]                                           |
| Escherichia coli O11:H30                                             | 1990 | bacteria  | 1 | 2 | 0 | 0 | Food industry changes             | Canada (Guelph, Province d'Ontario)                                                  | [81][144][609][662]                                  |
| Escherichia coli O145:H-                                             | 1980 | bacteria  | 1 | 2 | 0 | 0 | Food industry changes             | US (South Dakota)                                                                    | [81][144][609][627]                                  |
| Escherichia coli O145:H5                                             | 1990 | bacteria  | 1 | 2 | 0 | 0 | Food industry changes             | Japan                                                                                | [81][144][327][609]                                  |
| Escherichia coli O153:H25                                            | 1984 | bacteria  | 1 | 2 | 0 | 0 | Food industry changes             | UK (Belfast)                                                                         | [81][144][548][609]                                  |
| Escherichia coli O157:H7                                             | 1975 | bacteria  | 1 | 2 | 0 | 0 | Food industry changes             | US (California)                                                                      | [14][336][511][609]                                  |
| Escherichia coli O163:H19                                            | 1984 | bacteria  | 1 | 2 | 0 | 0 | Food industry changes             | UK (Southampton)                                                                     | [81][144][548][609]                                  |
| Escherichia coli O26:H- [nonmotile]                                  | 1952 | bacteria  | 1 | 2 | 0 | 0 | Food industry changes             | Switzerland                                                                          | [81][144][443][462][609]                             |
| Escherichia coli O26:H11                                             | 1965 | bacteria  | 1 | 2 | 0 | 0 | Food industry changes             | Italy (Palermo)                                                                      | [81][82][144][548][609]                              |
| Escherichia coli O4:H-                                               | 1983 | bacteria  | 1 | 2 | 0 | 0 | Food industry changes             | US (Georgia)                                                                         | [81][144][609][627]                                  |
| Escherichia coli O4:H5                                               | 1980 | bacteria  | 1 | 2 | 0 | 0 | Food industry changes             | Australia (Subiaco)                                                                  | [81][144][239][609]                                  |
| Escherichia coli O45:H2                                              | 1983 | bacteria  | 1 | 2 | 0 | 0 | Food industry changes             | US (Michigan)                                                                        | [81][144][609][627]                                  |
| Escherichia coli O5:H-                                               | 1980 | bacteria  | 1 | 2 | 0 | 0 | Food industry changes             | UK                                                                                   | [81][144][168][609]                                  |
| Escherichia coli O55:H7                                              | 1980 | bacteria  | 1 | 2 | 0 | 0 | Food industry changes             | UK                                                                                   | [81][144][168][609]                                  |
| Escherichia coli O91:H-                                              | 1995 | bacteria  | 1 | 2 | 0 | 0 | Food industry changes             | Italy, Germany                                                                       | [26][144][309][523][609]                             |
| European Tick Borne Encephalitis                                     | 1993 | virus     | 1 | 2 | 0 | 1 | Land use changes                  | Norway, Sweden; Denmark (Bornholm)                                                   | [34][245][360][609]                                  |
| Far Eastern Tick Borne Encephalitis                                  | 1993 | virus     | 1 | 2 | 0 | 1 | Land use changes                  | Japan (Kamiso, Oshima District, Hokkaido)                                            | [34][173][603][609]                                  |
| Francisella tularensis                                               | 1966 | bacteria  | 1 | 2 | 0 | 1 | Agricultural industry changes     | Sweden (Käll, Jamtlands Lan; Hogarna Jamtlands Lan)                                  | [148][596][609]                                      |
| Fusarium moniliforme                                                 | 1978 | fungi     | 0 | 0 | 0 | 0 | Human susceptibility to infection | US (Bethesda, Maryland)                                                              | [23][333][609][678]                                  |
| Fusarium oxysporum                                                   | 1972 | fungi     | 0 | 0 | 0 | 0 | Human susceptibility to infection | US (Morgantown, West Virginia)                                                       | [23][243][333][609]                                  |
| Fusarium solani                                                      | 1973 | fungi     | 0 | 0 | 0 | 0 | Human susceptibility to infection | US (Kansas)                                                                          | [23][130][333][609]                                  |
| Giardia duodenalis                                                   | 1975 | protozoa  | 0 | 0 | 0 | 0 | Human demographics & behavior     | US (Atlanta, Georgia)                                                                | [88][255][609][620]                                  |
| Guama                                                                | 1954 | virus     | 1 | 2 | 0 | 1 | Land use changes                  | Brazil (Belem)                                                                       | [117][562][609]                                      |
| Guanarito                                                            | 1989 | virus     | 1 | 2 | 0 | 0 | Land use changes                  | Venezuela (Guanarito, Estado Portuguesa)                                             | [22][125][157][222][529][609][633]                   |
| Haemophilus ducreyi                                                  | 2002 | bacteria  | 0 | 0 | 0 | 0 | Human susceptibility to infection | Europe                                                                               | [254][609]                                           |
| Haemophilus influenzae                                               | 2000 | bacteria  | 0 | 0 | 0 | 0 | Human susceptibility to infection | Italy                                                                                | [118][609]                                           |
| Haemophilus influenzae amp/cm/tmp-smz-res                            | 1979 | bacteria  | 0 | 0 | 1 | 0 | Antimicrobial agent use           | Thailand (Bangkok Noi)                                                               | [565][609]                                           |
| Haemophilus influenzae amp-res (beta-lac positive)                   | 1972 | bacteria  | 0 | 0 | 1 | 0 | Antimicrobial agent use           | Germany                                                                              | [609][693][703][743][745]                            |
| Haemophilus influenzae biogroup aegyptius                            | 1984 | bacteria  | 0 | 0 | 1 | 0 | Medical industry changes          | Brazil (Londrina, Estado do Parana)                                                  | [416][699][723][735][736]                            |
| Haemophilus influenzae chlor/amp-res                                 | 1979 | bacteria  | 0 | 0 | 1 | 0 | Antimicrobial agent use           | Thailand (Bangkok Noi)                                                               | [609][699][720]                                      |
| Haemophilus influenzae chlor/for-res                                 | 1975 | bacteria  | 0 | 0 | 1 | 0 | Antimicrobial agent use           | Netherlands                                                                          | [609][699][720]                                      |
| Haemophilus influenzae chlor-res                                     | 1975 | bacteria  | 0 | 0 | 1 | 0 | Antimicrobial agent use           | US (Texas)                                                                           | [609][695]                                           |
| Hansenula anomala                                                    | 1984 | fungi     | 0 | 0 | 0 | 0 | Human susceptibility to infection | UK (Liverpool Maternity Hospital, Liverpool)                                         | [261][322][421]                                      |
| Hantaan                                                              | 1941 | virus     | 1 | 2 | 0 | 0 | Land use changes                  | China (Jilin; Heilongjiang; Liaoning)                                                | [14][72][336][609]                                   |
| Helicobacter cinaedi                                                 | 1984 | bacteria  | 1 | 1 | 0 | 0 | Human demographics & behavior     | US (University of Texas M. D. Anderson Hospital and Tumor Institute, Houston, Texas) | [430][459][581]                                      |
| Helicobacter fennelliae                                              | 1980 | bacteria  | 1 | 1 | 0 | 0 | Human demographics & behavior     | US (Harborview Medical Center, Seattle, Washington)                                  | [190][431][581][623][624]                            |
| Hendra                                                               | 1994 | virus     | 1 | 2 | 0 | 0 | International travel & commerce   | Australia (Brisbane, Queensland)                                                     | [424][446][609]                                      |
| Hepatitis B HBsAg-negative (variant with truncated protein products) | 1989 | virus     | 0 | 0 | 0 | 0 | Medical industry changes          | Italy; Greece                                                                        | [141][141][154][336][609]                            |
| Hepatitis B vaccine escape mutant                                    | 1990 | virus     | 0 | 0 | 0 | 0 | Human demographics & behavior     | Italy (Neopolitan)                                                                   | [141][154][336][598][598][609]                       |
| Hepatitis C                                                          | 1975 | virus     | 0 | 0 | 0 | 0 | Human susceptibility to infection | US (Bethesda, Maryland)                                                              | [141][189][336][579][609]                            |
| Hepatitis E                                                          | 1955 | virus     | 1 | 2 | 0 | 0 | Unspecified                       | India (Delhi)                                                                        | [328][336][609]                                      |
| Hepatitis G                                                          | 1964 | virus     | 0 | 0 | 0 | 0 | Medical industry changes          | US (Chicago, Illinois)                                                               | [37][275][567][609]                                  |
| Histoplasma capsulatum                                               | 1980 | fungi     | 1 | 2 | 0 | 0 | Human susceptibility to infection | US (Indianapolis, Indiana)                                                           | [609][641]                                           |
| Human enterovirus B Echovirus type 13                                | 2000 | virus     | 0 | 0 | 0 | 0 | International travel & commerce   | Spain (Canary Islands)                                                               | [59][419][624]                                       |
| Human Herpesvirus 1 Acyclovir-res                                    | 1980 | virus     | 0 | 0 | 1 | 0 | Antimicrobial agent use           | US (North Carolina)                                                                  | [146][336][564][609]                                 |
| Human Herpesvirus 1 Idoxuridine-res                                  | 1963 | virus     | 0 | 0 | 1 | 0 | Antimicrobial agent use           | US (Gainesville, Florida)                                                            | [194][336][574][609]                                 |
| Human Herpesvirus 3 acyclovir-res                                    | 1986 | virus     | 0 | 0 | 0 | 0 | Human susceptibility to infection | US (Suffolk County, New York)                                                        | [349][447][609]                                      |
| Human Herpesvirus 5/CMV foscarnet-res                                | 1991 | virus     | 0 | 0 | 1 | 0 | Antimicrobial agent use           | US (Milwaukee, Wisconsin)                                                            | [325][336][609]                                      |
| Human Herpesvirus 5/CMV ganciclovir-res                              | 1989 | virus     | 0 | 0 | 1 | 0 | Antimicrobial agent use           | US (University of Minnesota Health Sciences Center, Minneapolis, Minnesota)          | [182][270][336][609]                                 |
| Human Herpesvirus 6                                                  | 1986 | virus     | 0 | 0 | 0 | 0 | Human susceptibility to infection | US (Philadelphia, Pennsylvania)                                                      | [191][69][270][528][579][591][610][676]              |
| Human Herpesvirus 7                                                  | 1989 | virus     | 0 | 0 | 0 | 0 | Human susceptibility to infection | US (Bethesda, Maryland)                                                              | [204][247][270][341]                                 |
| Human Herpesvirus 8                                                  | 1994 | virus     | 0 | 0 | 0 | 0 | Human susceptibility to infection | US (New York, New York)                                                              | [121][166][186][270][579][609]                       |
| Human Immunodeficiency Virus 1                                       | 1959 | virus     | 1 | 2 | 0 | 0 | Bushmeat                          | Congo (Kinshasa)                                                                     | [1][62][336][609][687][708][709][715][716][718][728] |
| Human Immunodeficiency Virus 1 Dideoxycytidine-res                   | 1990 | virus     | 0 | 0 | 1 | 0 | Antimicrobial agent use           | US (New Brunswick, New Jersey)                                                       | [196][609]                                           |
| Human Immunodeficiency Virus 1 multi-dideoxynucleoside res           | 1994 | virus     | 0 | 0 | 1 | 0 | Antimicrobial agent use           | US (West Point, Pennsylvania)                                                        | [311][560][609]                                      |
| Human Immunodeficiency Virus 1 Zidovudine-res                        | 1986 | virus     | 0 | 0 | 1 | 0 | Antimicrobial agent use           | US (San Diego, California)                                                           | [331][336][609]                                      |
| Human Immunodeficiency Virus 2                                       | 1960 | virus     | 0 | 0 | 0 | 0 | War & famine                      | Guinea Bissau                                                                        | [104][137][336][339][376][609]                       |
| Human papillomavirus                                                 | 1980 | virus     | 0 | 0 | 0 | 0 | Human demographics & behavior     | Unspecified                                                                          | [336][609]                                           |
| Human T-Lymphotropic virus 1                                         | 1974 | virus     | 0 | 0 | 0 | 0 | Human susceptibility to infection | Japan (Kyushu)                                                                       | [167][609][677]                                      |
| Human T-Lymphotropic Virus 2                                         | 1979 | virus     | 0 | 0 | 0 | 0 | Medical industry changes          | US (Bethesda, Maryland)                                                              | [336][474]                                           |
| Influenza A virus                                                    | 1967 | virus     | 1 | 2 | 0 | 0 | Agricultural industry changes     | China (Hone Kong)                                                                    | [141][336][336][539][599][609]                       |
| Isospora belli                                                       | 1981 | protozoa  | 0 | 0 | 0 | 0 | Human susceptibility to infection | US (Miami, Florida)                                                                  | [379][609]                                           |
| Jamestown Canyon virus                                               | 1960 | virus     | 1 | 2 | 0 | 1 | Land use changes                  | US (Wisconsin)                                                                       | [233][336][617]                                      |
| Japanese encephalitis virus                                          | 1989 | virus     | 1 | 2 | 0 | 1 | Agricultural industry changes     | Papua New Guinea (Daru)                                                              | [336][380][361][561][609]                            |
| Junin virus Unspecified Argentine hemorrhagic fever                  | 1958 | virus     | 1 | 2 | 0 | 0 | Agricultural industry changes     | Argentina (Junin, Provincia de Buenos Aires)                                         | [52][181][368][369][452][609]                        |
| Klebsiella pneumoniae                                                | 1981 | bacteria  | 1 | 1 | 0 | 0 | Human susceptibility to infection | Taiwan (Taipei)                                                                      | [122][207][609][642]                                 |
| Klebsiella pneumoniae late generation cephalosporins-res             | 1983 | bacteria  | 0 | 0 | 1 | 0 | Antimicrobial agent use           | Germany (Frankfurt, Land Brandenburg)                                                | [324][395][551][609]                                 |
| Kunjin virus                                                         | 1974 | virus     | 1 | 2 | 0 | 1 | Land use changes                  | Australia (Mildura, Victoria)                                                        | [248][377]                                           |
| Kyasanur forest disease virus                                        | 1957 | virus     | 1 | 2 | 0 | 1 | Land use changes                  | India (Karnataka)                                                                    | [235][236][609][637]                                 |
| LaCrosse virus                                                       | 1960 | virus     | 1 | 2 | 0 | 1 | Land use changes                  | US (La Crosse, Wisconsin)                                                            | [238][302][618]                                      |
| Laguna Negra virus                                                   | 1995 | virus     | 1 | 2 | 0 | 0 | Agricultural industry changes     | Paraguay (Chaco Region)                                                              | [303][609][666]                                      |
| Lassa virus                                                          | 1969 | virus     | 1 | 2 | 0 | 0 | International travel & commerce   | Nigeria (Lassa)                                                                      | [141][131][195][202][407][408][609]                  |
| Legionella pneumophila                                               | 1976 | bacteria  | 0 | 0 | 0 | 0 | Other industries                  | US (Philadelphia, Pennsylvania)                                                      | [141][336][594][609]                                 |
| Leishmania donovani                                                  | 1988 | protozoa  | 1 | 2 | 0 | 1 | Human susceptibility to infection | Germany                                                                              | [32][132][609]                                       |
| Leishmania infantum                                                  | 1990 | protozoa  | 1 | 2 | 0 | 1 | Land use changes                  | Spain; France; Portugal; Italy                                                       | [158][238][609][658]                                 |
| Leishmania tropica                                                   | 1990 | protozoa  | 1 | 2 | 0 | 1 | War & famine                      | Saudi Arabia                                                                         | [336][366]                                           |
| Leptospira fainei                                                    | 1995 | bacteria  | 1 | 1 | 0 | 0 | Agricultural industry changes     | Australia (Victoria)                                                                 | [55][124]                                            |
| Leptospira interrogans                                               | 1950 | bacteria  | 1 | 2 | 0 | 0 | War & famine                      | Malaysia                                                                             | [336][340][609]                                      |
| Leptospira weilii                                                    | 2000 | bacteria  | 1 | 2 | 0 | 0 | Land use changes                  | Malaysia (Sabah)                                                                     | [244]                                                |
| Listeria monocytogene                                                | 1979 | bacteria  | 1 | 2 | 0 | 0 | Agricultural industry changes     | Canada (Prince Edward Island, Nova Scotia, New Brunswick)                            | [225][537][609]                                      |
| Loa loa                                                              | 1990 | helminths | 0 | 0 | 0 | 1 | International travel & commerce   | Guinea                                                                               | [2][176][238][460][609][621]                         |
| Machupo virus                                                        | 1959 | virus     | 1 | 2 | 0 | 0 | Agricultural industry changes     | Boliva (El Beni)                                                                     | [157][316][464][529][582][609]                       |
| Malassezia furfur                                                    | 1981 | helminths | 1 | 1 | 0 | 0 | Human susceptibility to infection | US (Cleveland, Ohio)                                                                 | [294][504]                                           |
| Malassezia pachydermatis                                             | 1984 | fungi     | 1 | 2 | 0 | 0 | Human susceptibility to infection | US (Palo Alto, California)                                                           | [133][396][609]                                      |
| Marburg virus                                                        | 1967 | virus     | 1 | 2 | 0 | 0 | Medical industry changes          | Germany (Wolfshausen, Land Hessen)                                                   | [141][336][380][465][609][721]                       |

|                                                                     |      |            |   |   |   |   |                                     |                                                                        |                                                                       |
|---------------------------------------------------------------------|------|------------|---|---|---|---|-------------------------------------|------------------------------------------------------------------------|-----------------------------------------------------------------------|
| Mayaro virus                                                        | 1954 | virus      | 1 | 2 | 0 | 1 | Land use changes                    | Trinidad                                                               | [45][609][613][613]                                                   |
| Measles virus                                                       | 1980 | virus      | 0 | 0 | 0 | 0 | Breakdown of public health measures | US                                                                     | [187][336][489][609]                                                  |
| Menangle virus                                                      | 1997 | virus      | 1 | 2 | 0 | 0 | Agricultural industry changes       | Australia (Sydney, New South Wales)                                    | [123][360][468][609][688]                                             |
| Metorchis conjunctus                                                | 1993 | helminths  | 1 | 2 | 0 | 0 | Agricultural industry changes       | Canada (Montreal)                                                      | [144][362][609]                                                       |
| Monkeypox virus                                                     | 1970 | virus      | 1 | 2 | 0 | 0 | Bushmeat                            | Congo (Basankusu)                                                      | [101][329][372][609]                                                  |
| Murray Valley encephalitis virus                                    | 1950 | virus      | 1 | 2 | 0 | 1 | Climate & weather                   | Australia (Mildura, Victoria)                                          | [377][686][609]                                                       |
| Mycobacterium abscessus                                             | 1950 | bacteria   | 0 | 0 | 0 | 0 | Human susceptibility to infection   | US (Saint Louis, Missouri)                                             | [411]                                                                 |
| Mycobacterium asiaticum                                             | 1971 | bacteria   | 1 | 2 | 0 | 0 | Human susceptibility to infection   | Australia (Brisbane, Queensland)                                       | [653]                                                                 |
| Mycobacterium bovis                                                 | 1964 | bacteria   | 1 | 2 | 0 | 0 | Human susceptibility to infection   | Canada (Ontario)                                                       | [91][152][609][663]                                                   |
| Mycobacterium bovis multiple drug-res                               | 1989 | bacteria   | 0 | 0 | 0 | 0 | Human susceptibility to infection   | Brazil                                                                 | [97][219][609]                                                        |
| Mycobacterium celatum                                               | 1989 | bacteria   | 0 | 0 | 0 | 0 | Human susceptibility to infection   | US (California)                                                        | [108][472]                                                            |
| Mycobacterium chelonae                                              | 1966 | bacteria   | 0 | 0 | 0 | 0 | Human susceptibility to infection   | UK (West Hartlepool)                                                   | [93][103][226][285][472][550][589]                                    |
| Mycobacterium conspicuum                                            | 1995 | bacteria   | 0 | 0 | 0 | 0 | Human susceptibility to infection   | Germany (Hannover, Land Niedersachsen)                                 | [588]                                                                 |
| Mycobacterium genavense                                             | 1989 | bacteria   | 1 | 1 | 0 | 0 | Human susceptibility to infection   | Switzerland (Geneve)                                                   | [94][472]                                                             |
| Mycobacterium goodii                                                | 1967 | bacteria   | 1 | 1 | 0 | 0 | Human susceptibility to infection   | US (Baltimore, Maryland)                                               | [220][383][449][472][650]                                             |
| Mycobacterium haemophilum                                           | 1971 | bacteria   | 1 | 3 | 0 | 0 | Human susceptibility to infection   | Israel (Meir Hospital, Kafar Saba)                                     | [584][609]                                                            |
| Mycobacterium kansasii                                              | 1955 | bacteria   | 1 | 2 | 0 | 0 | Human susceptibility to infection   | US (Dallas County, Texas)                                              | [30][134][461][669]                                                   |
| Mycobacterium mageritense                                           | 1968 | bacteria   | 1 | 3 | 0 | 0 | Human susceptibility to infection   | Sweden (Malmo)                                                         | [27][1542]                                                            |
| Mycobacterium marinum                                               | 1951 | bacteria   | 1 | 2 | 0 | 0 | Agricultural industry changes       | Sweden (Orebro)                                                        | [184][347][609][615][682]                                             |
| Mycobacterium scrofulaceum                                          | 1951 | bacteria   | 1 | 2 | 0 | 0 | Human susceptibility to infection   | Canada (Montreal Children's Hospital, Montreal)                        | [38][1481]                                                            |
| Mycobacterium shimoidei                                             | 1975 | bacteria   | 0 | 0 | 0 | 0 | Human susceptibility to infection   | Japan                                                                  | [625]                                                                 |
| Mycobacterium simiae                                                | 1970 | bacteria   | 1 | 2 | 0 | 0 | Human susceptibility to infection   | Senegal (Dakar, Region de Dakar)                                       | [92]                                                                  |
| Mycobacterium szulgai                                               | 1984 | bacteria   | 1 | 3 | 0 | 0 | Human susceptibility to infection   | Israel                                                                 | [241]                                                                 |
| Mycobacterium tuberculosis                                          | 1981 | bacteria   | 1 | 2 | 0 | 0 | Human susceptibility to infection   | US (Miami, Florida)                                                    | [336][473][609]                                                       |
| Mycobacterium tuberculosis isoniazid-res                            | 1981 | bacteria   | 0 | 0 | 0 | 0 | War & famine                        | North Korea: South Korea                                               | [78][609]                                                             |
| Mycobacterium tuberculosis multiple drug-res                        | 1991 | bacteria   | 0 | 0 | 1 | 0 | Antimicrobial agent use             | US (New York, New York)                                                | [199][609][694][714][727]                                             |
| Mycobacterium xenopi                                                | 1965 | bacteria   | 1 | 1 | 0 | 0 | Human susceptibility to infection   | UK (London)                                                            | [375]                                                                 |
| Mycoplasma fermentans                                               | 1950 | bacteria   | 0 | 0 | 0 | 0 | Human susceptibility to infection   | Netherlands (Groningen)                                                | [67][522]                                                             |
| Mycoplasma genitalium                                               | 1981 | bacteria   | 0 | 0 | 0 | 0 | Human demographics & behavior       | UK (St. Mary's Hospital, London)                                       | [626]                                                                 |
| Neisseria gonorrhoeae fluoroquinolones-res                          | 1992 | bacteria   | 0 | 0 | 0 | 0 | International travel & commerce     | Australia (Sydney)                                                     | [84][604][609]                                                        |
| Neisseria gonorrhoeae penicillin-res                                | 1999 | bacteria   | 0 | 0 | 1 | 0 | Antimicrobial agent use             | Japan (Kitakyushu)                                                     | [609][643]                                                            |
| Neisseria gonorrhoeae penicillin-res                                | 1956 | bacteria   | 0 | 0 | 1 | 0 | War & famine                        | UK (Whitshapel Clinic, London Hospital, London)                        | [318][609]                                                            |
| Neisseria gonorrhoeae tetracycline-res                              | 1983 | bacteria   | 0 | 0 | 1 | 0 | Antimicrobial agent use             | US (Nashua, New Hampshire)                                             | [10][609][643]                                                        |
| Neisseria meningitidis pen-res                                      | 1985 | bacteria   | 0 | 0 | 1 | 0 | Antimicrobial agent use             | Spain (Madrid)                                                         | [289][626][609]                                                       |
| Neisseria meningitidis serogroup A termed subgroup III              | 1966 | bacteria   | 0 | 0 | 0 | 0 | International travel & commerce     | China (Jiangsu, Hubei)                                                 | [3][116][279][579][609]                                               |
| Neisseria meningitidis serogroup W-135                              | 2000 | bacteria   | 0 | 0 | 0 | 0 | International travel & commerce     | Saudia Arabia (Makkah; Al Madinah al Munawwarah; Jedda)                | [348][609]                                                            |
| Neisseria weaveri                                                   | 1960 | bacteria   | 1 | 3 | 0 | 0 | Unspecified                         | US (Washington)                                                        | [44]                                                                  |
| New variant Creutzfeldt Jacob Disease                               | 1994 | prion      | 1 | 1 | 0 | 0 | Agricultural industry changes       | UK                                                                     | [336][609][664][691][701][711][712][746]                              |
| Nipah virus                                                         | 1998 | virus      | 1 | 2 | 0 | 0 | Agricultural industry changes       | Malaysia (Perak)                                                       | [360][579][609]                                                       |
| Nocardia veterana                                                   | 2001 | bacteria   | 0 | 0 | 0 | 0 | Human susceptibility to infection   | Australia (Austin & Repatriation Medical Center, Heidelberg, Victoria) | [242][476]                                                            |
| Norwalk virus                                                       | 1968 | virus      | 1 | 1 | 0 | 0 | Agricultural industry changes       | US (Norwalk, Ohio)                                                     | [27][307][336][579][609]                                              |
| Nosema connori                                                      | 1973 | protozoa   | 0 | 0 | 0 | 0 | Human susceptibility to infection   | Japan                                                                  | [5][373][418][609]                                                    |
| Ockelbo virus (subtype of Sindbis)                                  | 1960 | virus      | 1 | 2 | 0 | 1 | International travel & commerce     | Sweden (Ockelbo)                                                       | [432][559][569][609]                                                  |
| Omsk virus                                                          | 1941 | virus      | 1 | 2 | 0 | 0 | International travel & commerce     | Russia (Omsk District, Sarghat Region, West Siberia)                   | [236][356]                                                            |
| O'nyong-nyong virus                                                 | 1955 | virus      | 1 | 2 | 0 | 1 | Unspecified                         | Uganda (Gulu)                                                          | [215][228][477][609][614][665]                                        |
| Orientia tsutsugamushi                                              | 1948 | bacteria   | 1 | 3 | 0 | 1 | War & famine                        | Mount Fuji                                                             | [79][336][469]                                                        |
| Oropouche virus                                                     | 1955 | virus      | 1 | 2 | 0 | 1 | Land use changes                    | Trinidad (Sangre Grande, County of Saint Andrew)                       | [46][228][265][519][609]                                              |
| Orungo virus                                                        | 1976 | virus      | 1 | 2 | 0 | 1 | Unspecified                         | Nigeria; Central Africa Republic                                       | [228][744]                                                            |
| Penicillium marneffei                                               | 1970 | fungi      | 1 | 2 | 0 | 0 | International travel & commerce     | US (South Carolina)                                                    | [165][609]                                                            |
| Picobirnavirus                                                      | 1984 | virus      | 1 | 2 | 0 | 0 | Human susceptibility to infection   | Brazil (Bahia)                                                         | [216][463][609][696][697][698][700]                                   |
| Plasmodium falciparum chloroquine-res                               | 1957 | protozoa   | 0 | 0 | 0 | 1 | Antimicrobial agent use             | Venezuela (Trujillo, Estado Trujillo)                                  | [110][359][412][470][609]                                             |
| Plasmodium falciparum mefloquine-res                                | 1982 | protozoa   | 0 | 0 | 0 | 1 | Antimicrobial agent use             | Thailand (Trat)                                                        | [95][110][437][470][609][657][670]                                    |
| Plasmodium falciparum multiple drug-res                             | 1991 | protozoa   | 0 | 0 | 0 | 1 | Land use changes                    | Thailand (Mae Sot, Changwat Tak; Bo Rai)                               | [609][670][671]                                                       |
| Plasmodium falciparum proguanil-res                                 | 1948 | protozoa   | 0 | 0 | 0 | 1 | Antimicrobial agent use             | Malaysia                                                               | [6][110][470][609]                                                    |
| Plasmodium falciparum quinine-res                                   | 1960 | protozoa   | 0 | 0 | 0 | 1 | Antimicrobial agent use             | Thailand (Trat)                                                        | [110][428][436][470][609]                                             |
| Plasmodium falciparum sulfadoxine-pyrimethamine-res                 | 1981 | protozoa   | 0 | 0 | 0 | 1 | Antimicrobial agent use             | Thailand (Sa Kaeo)                                                     | [87][283][609][655]                                                   |
| Plasmodium vivax                                                    | 1964 | protozoa   | 0 | 0 | 0 | 1 | Breakdown of public health measures | India                                                                  | [344][554][609]                                                       |
| Plasmodium vivax chloroquine-res                                    | 1989 | protozoa   | 0 | 0 | 0 | 1 | War & famine                        | Papua New Guinea (East New Britain)                                    | [509][609]                                                            |
| Plasmodium vivax proguanil-res                                      | 1948 | protozoa   | 0 | 0 | 1 | 1 | Antimicrobial agent use             | Malaysia                                                               | [6][609]                                                              |
| Pneumocystis carinii                                                | 1942 | fungi      | 0 | 0 | 0 | 0 | Human susceptibility to infection   | Denmark                                                                | [609][634]                                                            |
| Poliovirus type 2                                                   | 2003 | virus      | 0 | 0 | 0 | 0 | Human demographics & behavior       | India (Uttar Pradesh)                                                  | [54][400][609]                                                        |
| Pseudomonas aeruginosa ceftazidimide-res                            | 1985 | bacteria   | 0 | 0 | 1 | 0 | Antimicrobial agent use             | Germany (Hygiene Institute of Frankfurt, Frankfurt, Land Brandenburg)  | [4][324][440][609]                                                    |
| Pseudomonas aeruginosa fluoroquinolone-res                          | 1987 | bacteria   | 0 | 0 | 1 | 0 | Antimicrobial agent use             | US (Stamford, Connecticut)                                             | [4][440][455][609]                                                    |
| Pseudomonas aeruginosa imipenem-res                                 | 1988 | bacteria   | 0 | 0 | 1 | 0 | Antimicrobial agent use             | Japan                                                                  | [4][217][440][484][609][647]                                          |
| Puumala virus                                                       | 1995 | virus      | 1 | 3 | 0 | 0 | Land use changes                    | Croatia                                                                | [80][336][609]                                                        |
| Rabies virus                                                        | 2001 | virus      | 1 | 2 | 0 | 0 | Land use changes                    | Costa Rica (Gamba)                                                     | [61][336][609]                                                        |
| Rhodococcus equi                                                    | 1966 | bacteria   | 1 | 2 | 0 | 0 | Human susceptibility to infection   | US (Minneapolis, Minnesota)                                            | [218]                                                                 |
| Rickettsia africae                                                  | 1992 | rickettsia | 1 | 2 | 0 | 1 | International travel & commerce     | Zimbabwe (Harare)                                                      | [312][313][535]                                                       |
| Rickettsia akari                                                    | 1946 | rickettsia | 1 | 2 | 0 | 1 | Human demographics & behavior       | US (Queens, New York, New York)                                        | [140][232][652]                                                       |
| Rickettsia felis                                                    | 1991 | rickettsia | 1 | 2 | 0 | 1 | Unspecified                         | US (Nueces County, Texas)                                              | [140][499][507][518][535][541][681]                                   |
| Rickettsia helvetica                                                | 1997 | rickettsia | 1 | 2 | 0 | 1 | Land use changes                    | Sweden (Uppsala)                                                       | [200][201][434]                                                       |
| Rickettsia honei                                                    | 1990 | rickettsia | 1 | 2 | 0 | 1 | International travel & commerce     | Thailand (University Hospital, Chiang Mai)                             | [454][514][568][595]                                                  |
| Rickettsia japonica                                                 | 1984 | rickettsia | 1 | 2 | 0 | 1 | Unspecified                         | Japan (Shikoku)                                                        | [140][535][602]                                                       |
| Rickettsia mongolotimonae                                           | 1996 | rickettsia | 1 | 2 | 0 | 1 | International travel & commerce     | France (Marseille)                                                     | [333][453][454][495][535]                                             |
| Rickettsia prowazekii                                               | 1995 | rickettsia | 1 | 2 | 0 | 1 | War & famine                        | Burundi (N'Gozi)                                                       | [15][336][497][498][609][689]                                         |
| Rickettsia slovaca                                                  | 1996 | rickettsia | 1 | 3 | 0 | 1 | Land use changes                    | France (Midi-Pyrennes)                                                 | [330][496][535]                                                       |
| Rickettsia typhi                                                    | 1983 | rickettsia | 1 | 2 | 0 | 1 | International travel & commerce     | US (Texas)                                                             | [140][258][385][496][532][667]                                        |
| Rift Valley fever virus                                             | 1977 | virus      | 1 | 2 | 0 | 1 | Land use changes                    | Egypt                                                                  | [14][147][336][531][534][609][707][717][719][726][729][730][731][742] |
| Rotavirus A                                                         | 1973 | virus      | 1 | 2 | 0 | 0 | Agricultural industry changes       | Australia (Melbourne, Victoria)                                        | [102][333][336][609]                                                  |
| Sabia virus Brazilian Hemorrhagic Fever                             | 1990 | virus      | 1 | 2 | 0 | 0 | Agricultural industry changes       | Brazil (Sao Paulo, Estado de Sao Paulo)                                | [125][223][350][609]                                                  |
| Salmonella enterica serovar typhi 3rd generation cephalosporins-res | 1999 | bacteria   | 1 | 3 | 1 | 0 | Agricultural industry changes       | Bangladesh (Dhaka Shishu Childrens Hospital, Dhaka)                    | [282][527][609]                                                       |
| Salmonella enterica serovar typhi chlor-res                         | 1950 | bacteria   | 0 | 0 | 1 | 0 | Antimicrobial agent use             | UK (Sheffield Royal Infirmary, Sheffield)                              | [139][240][282][451][609]                                             |
| Salmonella enterica serovar typhi cipro-res                         | 1991 | bacteria   | 0 | 0 | 1 | 0 | Antimicrobial agent use             | Nepal                                                                  | [71][282][521][609][629]                                              |
| Salmonella enterica serovar typhi CT18                              | 1993 | bacteria   | 0 | 0 | 1 | 0 | Antimicrobial agent use             | Vietnam (The Friendship Hospital, Cao Lanh, Tinh Dong Thap)            | [282][451][609]                                                       |
| Salmonella enterica serovar typhi multidrug-res                     | 1990 | bacteria   | 0 | 0 | 1 | 0 | Antimicrobial agent use             | Pakistan                                                               | [240][282][300][520][609]                                             |
| Salmonella enteritidis                                              | 1979 | bacteria   | 1 | 2 | 0 | 0 | Food industry changes               | Hungary (Dunaszentgyorgy)                                              | [402][486][516][573][609]                                             |
| Salmonella enteritidis phage type 4                                 | 1985 | bacteria   | 1 | 2 | 0 | 0 | Agricultural industry changes       | UK (England, Wales)                                                    | [284][486][493][535][609]                                             |
| Salmonella paratyphi multidrug-res                                  | 1997 | bacteria   | 0 | 0 | 1 | 0 | Antimicrobial agent use             | Pakistan (Rawalpindi)                                                  | [71]                                                                  |

|                                               |      |           |   |   |   |   |                                     |                                                                              |                                                  |
|-----------------------------------------------|------|-----------|---|---|---|---|-------------------------------------|------------------------------------------------------------------------------|--------------------------------------------------|
| Salmonella typhimurium drug-res               | 1963 | bacteria  | 1 | 2 | 1 | 0 | Agricultural industry changes       | UK (England; Wales)                                                          | [471][486][609]                                  |
| Salmonella typhimurium multidrug-res          | 1965 | bacteria  | 1 | 2 | 1 | 0 | Agricultural industry changes       | UK (England; Wales)                                                          | [471][486][609]                                  |
| Sandfly fever Naples virus                    | 1942 | virus     | 1 | 3 | 0 | 1 | War & famine                        | Gaza, Israel and West Bank                                                   | [65][262][525][609]                              |
| SARS Coronavirus                              | 2002 | virus     | 1 | 2 | 0 | 0 | Bushmeat                            | China (Foshan, Guangdong Shen)                                               | [690][702][713][747]                             |
| Scedosporium inflatum                         | 1981 | fungi     | 0 | 0 | 0 | 0 | Medical industry changes            | US (Farmington, Maine)                                                       | [371][530]                                       |
| Scedosporium prolificans                      | 1991 | fungi     | 0 | 0 | 0 | 0 | Human susceptibility to infection   | Spain                                                                        | [365][609]                                       |
| Schistosoma japonicum                         | 1950 | helminths | 1 | 2 | 0 | 0 | War & famine                        | China (Zhejiang; Fujian)                                                     | [286][314][336][399]                             |
| Schistosoma mansoni                           | 1999 | helminths | 1 | 2 | 0 | 0 | International travel & commerce     | Oman (Salalah)                                                               | [410][609]                                       |
| Seoul virus                                   | 1989 | virus     | 1 | 2 | 0 | 0 | Land use changes                    | US (Baltimore, US)                                                           | [147][336][609]                                  |
| Serratia marcescens                           | 1998 | bacteria  | 0 | 0 | 0 | 0 | Medical industry changes            | Turkey (Ankara)                                                              | [60][609]                                        |
| Serratia marcescens carbapenem-res            | 1992 | bacteria  | 0 | 0 | 1 | 0 | Antimicrobial agent use             | US (UCLA Medical Center, Los Angeles)                                        | [482][609]                                       |
| Serratia marcescens fluoroquinolone-res       | 1986 | bacteria  | 0 | 0 | 1 | 0 | Antimicrobial agent use             | Taiwan                                                                       | [556][609]                                       |
| Serratia odorifera biogroup I                 | 1987 | bacteria  | 1 | 2 | 0 | 0 | Human susceptibility to infection   | US (Tampa, Florida)                                                          | [129][141]                                       |
| Shigella dysenteriae                          | 1998 | bacteria  | 0 | 0 | 0 | 0 | Breakdown of public health measures | Indonesia (Bali, Kalimantan; Batam)                                          | [600][609]                                       |
| Shigella dysenteriae multiple drug-res        | 1955 | bacteria  | 0 | 0 | 1 | 0 | Antimicrobial agent use             | China (Hong Kong)                                                            | [342][420][606][609]                             |
| Shigella dysenteriae nalidixic ac.-res        | 1982 | bacteria  | 0 | 0 | 1 | 0 | Antimicrobial agent use             | Congo (Kivu)                                                                 | [517][606][609][646]                             |
| Shigella dysenteriae sulfa-res                | 1949 | bacteria  | 0 | 0 | 1 | 0 | Antimicrobial agent use             | Japan                                                                        | [606][609][646]                                  |
| Shigella dysenteriae tet-res                  | 1953 | bacteria  | 0 | 0 | 1 | 0 | Antimicrobial agent use             | Japan                                                                        | [185][404][609]                                  |
| Sin Nombre virus                              | 1978 | virus     | 1 | 2 | 0 | 0 | Land use changes                    | US (Idaho)                                                                   | [14][579][609][679]                              |
| Sindbis virus                                 | 1952 | virus     | 1 | 2 | 0 | 1 | Climate & weather                   | Uganda (Waiya Bay)                                                           | [608][609][673]                                  |
| Staphylococcus aureus                         | 1980 | bacteria  | 0 | 0 | 0 | 0 | Medical industry changes            | US (Minnesota)                                                               | [9][336][609]                                    |
| Staphylococcus aureus meth-res                | 1960 | bacteria  | 1 | 3 | 1 | 0 | Agricultural industry changes       | UK (England); Canada; US                                                     | [282][298][609]                                  |
| Staphylococcus aureus multiple drug-res       | 1976 | bacteria  | 0 | 0 | 1 | 0 | Antimicrobial agent use             | UK (London)                                                                  | [553][609]                                       |
| Staphylococcus aureus penicillin-res          | 1942 | bacteria  | 0 | 0 | 1 | 0 | Antimicrobial agent use             | US (Massachusetts)                                                           | [353][492][609]                                  |
| Staphylococcus aureus vanc-res                | 2002 | bacteria  | 0 | 0 | 1 | 0 | Antimicrobial agent use             | US (Dearborn, Michigan)                                                      | [21][579][609]                                   |
| Staphylococcus epidermidis methicillin-res    | 1962 | bacteria  | 0 | 0 | 1 | 0 | Antimicrobial agent use             | US (Boston, Massachusetts)                                                   | [153][198][485][502][524][577][609]              |
| Staphylococcus epidermidis rifampin-res       | 1994 | bacteria  | 0 | 0 | 1 | 0 | Antimicrobial agent use             | US (Hahnemann University, Philadelphia, Pennsylvania)                        | [485][609][672]                                  |
| Staphylococcus haemolyticus multiple drug-res | 1997 | bacteria  | 0 | 0 | 1 | 0 | Antimicrobial agent use             | India (New Delhi)                                                            | [389][593]                                       |
| Staphylococcus haemolyticus vanc-res          | 1984 | bacteria  | 0 | 0 | 1 | 0 | Antimicrobial agent use             | US (Albany, New York)                                                        | [544]                                            |
| Staphylococcus lugdunensis                    | 1988 | bacteria  | 1 | 2 | 0 | 0 | Human susceptibility to infection   | France (Lyon)                                                                | [172][203]                                       |
| Staphylococcus schleiferi                     | 1988 | bacteria  | 0 | 0 | 0 | 0 | Unspecified                         | France (Lyon)                                                                | [178][203][323]                                  |
| Stenotrophomonas maltophilia                  | 1943 | bacteria  | 0 | 0 | 1 | 0 | Antimicrobial agent use             | UK (Stafford)                                                                | [69][76][161][281][323][378][397][533][685][686] |
| Streptococcus iniae                           | 1995 | bacteria  | 1 | 3 | 0 | 0 | Agricultural industry changes       | Canada (Toronto)                                                             | [206][535][651]                                  |
| Streptococcus pneumoniae macrolide-res        | 1978 | bacteria  | 0 | 0 | 1 | 0 | Antimicrobial agent use             | France                                                                       | [53][291][609]                                   |
| Streptococcus pneumoniae multiple drug-res    | 1977 | bacteria  | 0 | 0 | 1 | 0 | Antimicrobial agent use             | South Africa (Baragwanath Hospital, Johannesburg)                            | [290][291][609]                                  |
| Streptococcus pneumoniae tet-res              | 1967 | bacteria  | 0 | 0 | 1 | 0 | Antimicrobial agent use             | Australia (Sydney)                                                           | [100][206][227][252][291][609]                   |
| Streptococcus pyogenes group A                | 1986 | bacteria  | 0 | 0 | 0 | 0 | Unspecified                         | US (Rancho Mirage, California)                                               | [336][609]                                       |
| Strongyloides stercoralis                     | 1949 | helminths | 0 | 0 | 0 | 0 | War & famine                        | Vietnam                                                                      | [214][246][609]                                  |
| Taenia solium                                 | 1978 | helminths | 1 | 1 | 0 | 0 | International travel & commerce     | Australia (Sydney, New South Wales)                                          | [490][547][609]                                  |
| Tahyna virus                                  | 1960 | virus     | 1 | 2 | 0 | 1 | Unspecified                         | Czech Republic                                                               | [64][228]                                        |
| Toscana virus                                 | 1970 | virus     | 0 | 0 | 0 | 1 | Unspecified                         | Italy (Toscana; Marche)                                                      | [213][228][545][546]                             |
| Toxoplasma gondii                             | 1981 | protozoa  | 1 | 1 | 0 | 0 | Human susceptibility to infection   | Canada (Montreal); US (New York, New York; Texas; Illinois); Brussels; Haiti | [42][354]                                        |
| Trachipleistophora anthropophtera             | 1998 | protozoa  | 0 | 0 | 0 | 0 | Human susceptibility to infection   | Czech Republic                                                               | [636]                                            |
| Trachipleistophora hominis                    | 1995 | protozoa  | 0 | 0 | 0 | 0 | Human susceptibility to infection   | Australia (Sydney, New South Wales)                                          | [192][267][609]                                  |
| Treponema pallidum                            | 1989 | bacteria  | 0 | 0 | 0 | 0 | War & famine                        | Moldova; Russia; Kazakhstan; Ukraine                                         | [506][609][600]                                  |
| Trichinella spiralis                          | 1970 | helminths | 1 | 2 | 0 | 0 | Breakdown of public health measures | Argentina; China; Mexico                                                     | [426][479][609]                                  |
| Trichomonas vaginalis                         | 1964 | protozoa  | 0 | 0 | 0 | 0 | Human susceptibility to infection   | US (Philadelphia, Pennsylvania)                                              | [580][585][609]                                  |
| Trichomonas vaginalis metronidazole-res       | 1979 | protozoa  | 0 | 0 | 1 | 0 | Antimicrobial agent use             | Austria (Wien)                                                               | [352][390][609]                                  |
| Trichosporon beigeli                          | 1970 | fungi     | 1 | 3 | 0 | 0 | Human susceptibility to infection   | South Africa (Durban)                                                        | [276][609][648]                                  |
| Tropheryma whippelii                          | 1967 | bacteria  | 0 | 0 | 0 | 0 | Unspecified                         | France                                                                       | [39][170][171][579]                              |
| Trypanosoma brucei gambiense                  | 1960 | protozoa  | 1 | 2 | 0 | 1 | War & famine                        | Democratic Republic of the Congo                                             | [578][609][635]                                  |
| Trypanosoma brucei rhodiensis                 | 1970 | protozoa  | 1 | 2 | 0 | 1 | Breakdown of public health measures | Sudan (Al Istiwa'iyah)                                                       | [413][609][659]                                  |
| Trypanosoma cruzi                             | 1968 | protozoa  | 1 | 2 | 0 | 1 | Land use changes                    | Brazil (Belem, Estado do Para)                                               | [191][555][609][612]                             |
| Venezuelan Equine Encephalitis virus          | 1943 | virus     | 1 | 2 | 0 | 1 | Agricultural industry changes       | Trinidad                                                                     | [228][238][336][494][609]                        |
| Vibrio cholerae O1 El Tor                     | 1961 | bacteria  | 0 | 0 | 0 | 0 | Breakdown of public health measures | Indonesia (Celebes Island; Sulawesi)                                         | [14][336][609]                                   |
| Vibrio cholerae O139                          | 1992 | bacteria  | 0 | 0 | 0 | 0 | International travel & commerce     | India (Madras)                                                               | [14][336][513][609][628]                         |
| Vibrio damsela                                | 1971 | bacteria  | 1 | 2 | 0 | 0 | Climate & weather                   | US (Louisiana)                                                               | [415][536]                                       |
| Vibrio fluvialis                              | 1965 | bacteria  | 1 | 3 | 0 | 0 | Climate & weather                   | Bangladesh (Dhaka)                                                           | [338][536]                                       |
| Vibrio hollisae                               | 1976 | bacteria  | 1 | 3 | 0 | 0 | Climate & weather                   | US (Maryland)                                                                | [415][536]                                       |
| Vibrio metschnikovii                          | 1978 | bacteria  | 0 | 0 | 0 | 0 | Climate & weather                   | US (Chicago, Illinois)                                                       | [295][536]                                       |
| Vibrio mimicus                                | 1977 | bacteria  | 1 | 3 | 0 | 0 | Climate & weather                   | US (Louisiana)                                                               | [155][536][552]                                  |
| Vibrio parahaemolyticus                       | 1950 | bacteria  | 1 | 2 | 0 | 0 | Climate & weather                   | Japan (Matsubara, Osaka-fu)                                                  | [293][305][536]                                  |
| Vibrio vulnificus                             | 1964 | bacteria  | 1 | 2 | 0 | 0 | Agricultural industry changes       | US (Virginia)                                                                | [89][333][573][609]                              |
| Wancella dermatitidis                         | 1980 | fungi     | 0 | 0 | 0 | 0 | Human susceptibility to infection   | US (South Carolina)                                                          | [263][382]                                       |
| Wesselsbron virus                             | 1989 | virus     | 1 | 1 | 0 | 1 | International travel & commerce     | Madagascar                                                                   | [228][609][683]                                  |
| West Nile Virus                               | 1999 | virus     | 1 | 2 | 0 | 1 | International travel & commerce     | US (Queens, New York, New York)                                              | [18][579][609][692][722][725]                    |
| Whitewater Arroyo virus                       | 1999 | virus     | 1 | 2 | 0 | 0 | Land use changes                    | US (California)                                                              | [73][579]                                        |
| Wuchereria bancrofti                          | 1965 | helminths | 0 | 0 | 0 | 1 | Land use changes                    | Egypt                                                                        | [253][460][609][619]                             |
| Yellow fever virus                            | 1940 | virus     | 1 | 2 | 0 | 1 | Breakdown of public health measures | Sudan (Nuba Mountains)                                                       | [238][336][409][609]                             |
| Yersinia enterocolitica O:3                   | 1949 | bacteria  | 1 | 1 | 0 | 0 | International travel & commerce     | Switzerland                                                                  | [259][607][609]                                  |
| Yersinia enterocolitica O:5, 27               | 1960 | bacteria  | 1 | 1 | 0 | 0 | International travel & commerce     | Germany                                                                      | [33][607][609]                                   |
| Yersinia enterocolitica O:9                   | 1968 | bacteria  | 1 | 1 | 0 | 0 | International travel & commerce     | Finland                                                                      | [31][433][607][609]                              |
| Yersinia pestis                               | 1970 | bacteria  | 1 | 2 | 0 | 1 | Land use changes                    | US (New Mexico)                                                              | [160][609]                                       |
| Yersinia pestis multiple drug-res             | 1995 | bacteria  | 1 | 2 | 1 | 1 | Antimicrobial agent use             | Madagascar (Province of Fianarantsoa)                                        | [209][501][609]                                  |
| Zika virus                                    | 1977 | virus     | 1 | 3 | 0 | 1 | Climate & weather                   | Indonesia (Tegalayo Hospital, Klanten)                                       | [228][439][609]                                  |



## 1.2. Source Details

Numbers of references correspond to those in Supplementary Information Table S1.

- [1] *The origin of HIV & the first cases of AIDS*. [cited 2004 6/5]; Available from: <http://www.avert.org/origins.htm>.
- [2] *Loa loa: a cutaneous filarial parasite of humans*. [cited 2003 12/5]; Available from: <http://math.smith.edu/~sawlab/fgn/pnb/loaloea.html>.
- [3] *Meningococcal disease*. [cited 2004 6/5]; Available from: <http://www.who.int/csr/disease/meningococcal/impact/en/>.
- [4] *Semiannual report: aggregated data from the National Nosocomial Infections Surveillance system*. [cited 2004 2/21]; Available from: <http://www.cdc.gov/ncidod/hip/SURVEILL/NNIS.HTM>.
- [5] *Arch Pathol*, 1959. **67**: p. 181-187.
- [6] *Chemotherapy of Malaria*. 1961, WHO: Geneva. p. 31-38.
- [7] *Ebola haemorrhagic fever in Zaire, 1976*. Bull World Health Organisation, 1978. **56**(2): p. 271-93.
- [8] WHO, *Ebola haemorrhagic fever in Sudan, 1976. Report of a WHO/International Study Team*. Bull World Health Organisation, 1978. **56**(2): p. 247-70.
- [9] *Toxic shock and vaginal tampons*. Lancet, 1980. **2**(8202): p. 1011.
- [10] *Tetracycline-resistant Neisseria gonorrhoeae--Georgia, Pennsylvania, New Hampshire*. MMWR Morb Mortal Wkly Rep, 1985. **34**(37): p. 563-4, 569-70.
- [11] *Human plague--United States, 1993-1994*. MMWR Morb Mortal Wkly Rep, 1994. **43**(13): p. 242-6.
- [12] *Update: human plague--India, 1994*. MMWR Morb Mortal Wkly Rep, 1994. **43**(41): p. 761-2.
- [13] *Outbreak of acute gastroenteritis attributable to Escherichia coli serotype O104:H21--Helena, Montana, 1994*. MMWR Morb Mortal Wkly Rep, 1995. **44**(27): p. 501-3.
- [14] *The threat of emerging infections*. Global Issues, 1996. **1**(17): p. 31-34.
- [15] *A large outbreak of epidemic louse-borne typhus in Burundi*. Wkly Epidemiol Rec, 1997. **72**(21): p. 152-3.
- [16] *Outbreak of hand, foot and mouth disease in Sarawak. Cluster of deaths among infants and young children*. Wkly Epidemiol Rec, 1997. **72**(28): p. 211-212.
- [17] *Q fever outbreak--Germany, 1996*. MMWR Morb Mortal Wkly Rep, 1997. **46**(2): p. 29-32.
- [18] *Outbreak of West Nile-like viral encephalitis--New York, 1999*. MMWR Morb Mortal Wkly Rep, 1999. **48**(38): p. 845-9.
- [19] *Expert working group on HHV-6 and 7 laboratory diagnosis and testing*. Canada Communicable Disease Report, 2000. **26 Suppl 4**: p. i-iv, 1-27, i-iv passim.
- [20] *Enteroviruses*. 2000 [cited 2004 2/24]; Available from: [www.vadscorner.com/internet44.html](http://www.vadscorner.com/internet44.html).
- [21] *Staphylococcus aureus resistant to vancomycin--United States, 2002*. MMWR Morb Mortal Wkly Rep, 2002. **51**(26): p. 565-7.
- [22] *Venezuelan Hemorrhagic Fever - Venezuela*. 2002 [cited 2004 6/5]; Available from: <http://www.promedmail.org/pls/pm/pm?an=20020203.3467>.
- [23] *Fusarium*. 2004 [cited 2004 11/2]; Available from: <http://www.mold-help.org/fusarium.htm>.
- [24] Abbas, J., et al., *Candida krusei fungemia. An escalating serious infection in immunocompromised patients*. Archives of Internal Medicine, 2000. **160**(17): p. 2659-2664.
- [25] Abou el Naga, I.F., *Studies on a newly emerging protozoal pathogen: Cyclospora cayetanensis*. J Egypt Soc Parasitol, 1999. **29**(2): p. 575-86.
- [26] Acheson, D.W.K. and G.T. Keusch, *Which Shiga toxin-producing types of E. coli are important?* ASM News, 1996. **62**: p. 302-306.
- [27] Adler, J.L. and R. Zickl, *Winter vomiting disease*. Journal of Infectious Diseases, 1969. **119**(6): p. 668-673.

- [28] Adler-Mosca, H., et al., *Development of resistance to quinolones in five patients with campylobacteriosis treated with norfloxacin or ciprofloxacin*. Eur J Clin Microbiol Infect Dis, 1991. **10**(11): p. 953-7.
- [29] Afzal-Shah, M. and D.M. Livermore, *Worldwide emergence of carbapenem-resistant Acinetobacter spp*. J Antimicrob Chemother, 1998. **41**(5): p. 576-7.
- [30] Ahn, C.H., et al., *Chemotherapy for pulmonary disease due to Mycobacterium kansasii: efficacies of some individual drugs*. Rev Infect Dis, 1981. **3**(5): p. 1028-1034.
- [31] Ahvonen, P. and E. Jansson, Scand J Clin Lab Invest, 1968. **21 Suppl**(101): p. 57.
- [32] Albrecht, H., et al., *Visceral leishmaniasis emerging as an important opportunistic infection in HIV-infected persons living in areas nonendemic for Leishmania donovani*. Archives of Pathology and Laboratory Medicine, 1996. **120**(2): p. 189-198.
- [33] Aleksic, S., et al., *Occurrence and clinical importance of the pathogenic serogroup O: 5, 27 of Yersinia enterocolitica in the Federal Republic of Germany and methods for its serological and bacteriological identification*. Zentralbl Bakteriol Mikrobiol Hyg [A], 1988. **269**(2): p. 197-204.
- [34] Allos, B.M. and D.N. Taylor, *Campylobacter infections*, in *Bacterial Infections of Humans: Epidemiology and Control*, A.S. Evans and P.S. Brachman, Editors. 1998, Plenum Medical Book Company: New York. p. 169-190.
- [35] Allworth, A., K. Murray, and J. Morgan, *A case of encephalitis due to a lyssavirus recently identified in fruit bats*. Communicable Diseases Intelligence, 1996. **20**: p. 504.
- [36] Altekruse, S.F., et al., *Campylobacter jejuni--an emerging foodborne pathogen*. Emerging Infectious Diseases, 1999. **5**(1): p. 28-35.
- [37] Alter, H.J., *The cloning and clinical implications of HGV and HGBV-C*. N Engl J Med, 1996. **334**(23): p. 1536-7.
- [38] Altwegg, M., et al., *Problems in identification of Campylobacter jejuni associated with acquisition of resistance to nalidixic acid*. J Clin Microbiol, 1987. **25**(9): p. 1807-1808.
- [39] Altwegg, M., *Tropheryma whippelii and the (Re)emergence of an Old Disease*, in *Emerging Bacterial Pathogens*, I. Muhldorfer and K.P. Schafer, Editors. 2001, Karger: New York. p. 137-149.
- [40] Amano, Y., et al., *Bartonellosis in Ecuador: serosurvey and current status of cutaneous verrucous disease*. The American Journal of Tropical Medicine and Hygiene, 1997. **57**(2): p. 174-179.
- [41] Amato Gauci, A.J., *The return of brucellosis*. Maltese Medical Journal, 1995. **7**: p. 7-8.
- [42] Ambroise-Thomas, P. and H. Pelloux, *Toxoplasmosis - congenital and in immunocompromised patients: a parallel*. Parasitol Today, 1993. **9**(2): p. 61-3.
- [43] Ampel, N.M., *Emerging disease issues and fungal pathogens associated with HIV infection*. Emerging Infectious Diseases, 1996. **2**(2): p. 109-116.
- [44] Andersen, B.M., et al., *Neisseria weaveri sp. nov., formerly CDC group M-5, a gram-negative bacterium associated with dog bite wounds*. J Clin Microbiol, 1993. **31**(9): p. 2456-2466.
- [45] Anderson, C.R., et al., *Mayaro virus: a new human disease agent. II. Isolation from blood of patients in Trinidad, B.W.I*. The American Journal of Tropical Medicine and Hygiene, 1957. **6**(6): p. 1012-1016.
- [46] Anderson, C.R., et al., *Oropouche virus: a new human disease agent from Trinidad, West Indies*. The American Journal of Tropical Medicine and Hygiene, 1961. **10**: p. 574-578.
- [47] Anderson, E.S., *Drug resistance in Salmonella typhimurium and its implications*. British Medical Journal, 1968. **3**(614): p. 333-339.
- [48] Anderson, B.E., et al., *Ehrlichia chaffeensis, a new species associated with human ehrlichiosis*. J Clin Microbiol, 1991. **29**(12): p. 2838-42.
- [49] Angulo, F. and M.E. St. Louis, *Botulism*, in *Bacterial Infections of Humans*, A.S. Evans and P.S. Brachman, Editors. 1998, Plenum: New York. p. 131-153.
- [50] Anzil, A.P., et al., *Amebic meningoencephalitis in a patient with AIDS caused by a newly recognized opportunistic pathogen. Leptomyxid ameba*. Archives of Pathology and Laboratory Medicine, 1991. **115**(1): p. 21-25.
- [51] Appleton, H. and P.G. Higgins, *Letter: Viruses and gastroenteritis in infants*. Lancet, 1975. **1**(7919): p. 1297.

- [52] Arribalzaga, R.A., *New epidemic disease due to unidentified germ: nephrotoxic, leukopenic and enanthematous hyperthermia*. El Día Médico, 1955. **27**(40): p. 1204-1210.
- [53] Arthur, M., A. Andremont, and P. Courvalin, *Distribution of erythromycin esterase and rRNA methylase genes in members of the family Enterobacteriaceae highly resistant to erythromycin*. Antimicrobial Agents and Chemotherapy, 1987. **31**(3): p. 404-409.
- [54] Arya, S.C., *Vanishing polio and emerging acute flaccid paralysis in India*. Natl Med J India, 2000. **13**(3): p. 163.
- [55] Arzouni, J.P., et al., *Human infection caused by Leptospira fainei*. Emerging Infectious Diseases, 2002. **8**(8): p. 865-868.
- [56] Ashford, R.W., *Occurrence of an undescribed coccidian in man in Papua New Guinea*. Annals of Tropical Medicine and Parasitology, 1979. **73**(5): p. 497-500.
- [57] Aucouturier, J., et al., *Assessment of efficacy and safety of various adjuvant formulations with a total soluble extract of Trichinella spiralis*. Parasite, 2001. **8**(2 Suppl): p. S126-32.
- [58] Auerbach, D.M., et al., *Cluster of cases of the acquired immune deficiency syndrome. Patients linked by sexual contact*. The American Journal of Medicine, 1984. **76**(3): p. 487-492.
- [59] Avellon, A., et al., *Molecular analysis of echovirus 13 isolates and aseptic meningitis, Spain*. Emerging Infectious Diseases, 2003. **9**(8): p. 934-941.
- [60] Aygun, C., et al., *Serratia marcescens: an emerging microorganism in the neonatal intensive care unit*. Turk J Pediatr, 2000. **42**(3): p. 219-222.
- [61] Badilla, X., et al., *Human rabies: a reemerging disease in Costa Rica?* Emerg Infect Dis, 2003. **9**(6): p. 721-723.
- [62] Bailes, E., et al., *Hybrid origin of SIV in chimpanzees*. Science, 2003. **300**(5626): p. 1713.
- [63] Bakken, J.S., et al., *Human granulocytic ehrlichiosis in the upper Midwest United States. A new species emerging?* Journal of the American Medical Association, 1994. **272**(3): p. 212-218.
- [64] Bardos, V. and F. Sluka, *Acute human infections caused by Tahyna virus*. Casopis Lékarů Českyých, 1963. **102**: p. 394-402.
- [65] Barnett, H.C. and W. Suyemoto, *Field studies on sandfly fever and Kal-Azar in Pakistan in Iran and in Baltistan (Little Tibet) Kashmir*. Trans NY Acad Sci, 1961. **23**: p. 609-617.
- [66] Bartlett, J.G., et al., *Antibiotic-associated pseudomembranous colitis due to toxin-producing clostridia*. N Engl J Med, 1978. **298**(10): p. 531-4.
- [67] Baseman, J.B. and J.G. Tully, *Mycoplasmas: sophisticated, reemerging, and burdened by their notoriety*. Emerging Infectious Diseases, 1997. **3**(1): p. 21-32.
- [68] Bass, J.W. and R.R. Wittler, *Return of epidemic pertussis in the United States*. Pediatr Infect Dis J, 1994. **13**(5): p. 343-5.
- [69] Bauernfeind, A., et al., *Qualitative and quantitative microbiological analysis of sputa of 102 patients with cystic fibrosis*. Infection, 1987. **15**(4): p. 270-277.
- [70] Beaver, P.C. and L. Rosen, *Memorandum on the First Report of Angiostrongylus in Man, by Nomura and Lin, 1945*. The American Journal of Tropical Medicine and Hygiene, 1964. **13**: p. 589-590.
- [71] Beeching, N.J., C.A. Hart, and B.I. Duerden, *Tropical and exotic infections. Proceedings of the 5th Liverpool Tropical School Bayer Symposium on Microbial Diseases. 14 February 1998*. J Med Microbiol, 2000. **49**(1): p. 5-27.
- [72] Benenson, A.S., ed. *Control of communicable diseases in man*. 15th ed. 1990, APHA: Washington, D. C.
- [73] Bennett, S.G., et al., *Arenavirus antibody in rodents indigenous to coastal southern California*. The American Journal of Tropical Medicine and Hygiene, 2000. **62**(5): p. 626-630.
- [74] Bergmire-Sweet, D., et al., *Escherichia coli O111:H8 outbreak among teenage campers: Texas 1999*. J Am Med Assoc, 2000. **283**: p. 2517.
- [75] Bergogne-Berezin, E. and M.L. Joly-Guillou, *Hospital infection with Acinetobacter spp.: an increasing problem*. Journal of Hospital Infection, 1991. **18 Suppl A**: p. 250-255.
- [76] Bergogne-Berezin, E., *Nosocomial infections: new agents, incidence, prevention*. Presse Med, 1995. **24**(2): p. 89-97.



- [77] Bergogne-Berezin, E. and K.J. Towner, *Acinetobacter* spp. as nosocomial pathogens: microbiological, clinical, and epidemiological features. *Clinical Microbiology Reviews*, 1996. **9**(2): p. 148-165.
- [78] Berliner, D.S. and A. Haupt, *Implications of emerging isoniazid resistance in Mycobacterium tuberculosis in Korea*. *Aviation, Space, and Environmental Medicine*, 1987. **58**(1): p. 83-85.
- [79] Berman, S.J., et al., *Epidemiology of the acute fevers of unknown origin in South Vietnam: effect of laboratory support upon clinical diagnosis*. *The American Journal of Tropical Medicine and Hygiene*, 1973. **22**(6): p. 796-801.
- [80] Beslagic, E., et al., *Serologic verification of epidemic hemorrhagic fever during the lifting of the blockade in Sarajevo*. *Med Arh*, 1996. **50**(3-4): p. 89-91.
- [81] Bettelheim, K.A., *Non-O157 verotoxin-producing Escherichia coli: a problem, paradox, and paradigm*. *Exp Biol Med (Maywood)*, 2003. **228**(4): p. 333-44.
- [82] Beutin, L., et al., *Close association of verotoxin (Shiga-like toxin) production with enterohemolysin production in strains of Escherichia coli*. *J Clin Microbiol*, 1989. **27**(11): p. 2559-64.
- [83] Beutin, L., et al., *Investigation of human infections with verocytotoxin-producing strains of Escherichia coli (VTEC) belonging to serogroup O118 with evidence for zoonotic transmission*. *Epidemiol Infect*, 2000. **125**(1): p. 47-54.
- [84] Birley, H., et al., *High level ciprofloxacin resistance in Neisseria gonorrhoeae*. *Genitourin Med*, 1994. **70**(4): p. 292-3.
- [85] Birtles, R.J. and D. Raoult, *The genera Afipia and Bartonella*, in *Bartonella and Afipia species emphasizing Bartonella henselae*, A. Schmidt, Editor. 1998, Karger: Basel. p. 1-31.
- [86] Bishop, R.F., et al., *Virus particles in epithelial cells of duodenal mucosa from children with acute non-bacterial gastroenteritis*. *Lancet*, 1973. **2**(7841): p. 1281-3.
- [87] Bjorkman, A. and P.A. Phillips-Howard, *The epidemiology of drug-resistant malaria*. *Trans R Soc Trop Med Hyg*, 1990. **84**(2): p. 177-80.
- [88] Black, R.E., et al., *Giardiasis in day-care centers: evidence of person-to-person transmission*. *Pediatrics*, 1977. **60**(4): p. 486-91.
- [89] Blake, P.A., et al., *Disease caused by a marine Vibrio. Clinical characteristics and epidemiology*. *N Engl J Med*, 1979. **300**(1): p. 1-5.
- [90] Blaser, M.J., *Campylobacter fetus--emerging infection and model system for bacterial pathogenesis at mucosal surfaces*. *Clinical Infectious Diseases*, 1998. **27**(2): p. 256-258.
- [91] Blazquez, J., et al., *Genetic characterization of multidrug-resistant Mycobacterium bovis strains from a hospital outbreak involving human immunodeficiency virus-positive patients*. *J Clin Microbiol*, 1997. **35**(6): p. 1390-3.
- [92] Boisvert, H., *Mycobacteria (M. bovis and atypical) identified at the Institut Pasteur, Paris, between 1960 and 1972*. *Annales de la Société Belge de Médecine Tropicale*, 1973. **53**(4): p. 233-245.
- [93] Bojalil, L.F., J. Cerbon, and A. Trujillo, *Adansonian classification of mycobacteria*. *J Gen Microbiol*, 1962. **28**: p. 333-46.
- [94] Bottger, E.C., et al., *Disseminated "Mycobacterium genavense" infection in patients with AIDS*. *Lancet*, 1992. **340**(8811): p. 76-80.
- [95] Boudreau, E.F., et al., *Type II mefloquine resistance in Thailand*. *Lancet*, 1982. **2**(8311): p. 1335.
- [96] Boughton, C.R., R.A. Hawkes, and H.M. Naim, *Illness caused by a Barmah Forest-like virus in New South Wales*. *Med J Aust*, 1988. **148**(3): p. 146-7.
- [97] Bouvet, E., et al., *A nosocomial outbreak of multidrug-resistant Mycobacterium bovis among HIV-infected patients. A case-control study*. *AIDS*, 1993. **7**(11): p. 1453-1460.
- [98] Bravo, F. and M.R. Sanchez, *New and re-emerging cutaneous infectious diseases in Latin America and other geographic areas*. *Dermatol Clin*, 2003. **21**(4): p. 655-68, viii.
- [99] Bray, J., *Isolation of antigenically homogenous strains of Bact. Coli Neapolitanum form summer diarrhoea of infants*. *J Path Bacteriol*, 1945. **57**: p. 239-47.
- [100] Breiman, R.F., et al., *Emergence of drug-resistant pneumococcal infections in the United States*. *Journal of the American Medical Association*, 1994. **271**(23): p. 1831-1835.

- [101] Breman, J.G., *Monkeypox: an emerging infection for humans?*, in *Emerging Infections 4*, W.M. Scheld, W.A. Craig, and J.M. Hughes, Editors. 2000, ASM Press: Washington, D.C. p. 45-76.
- [102] Bridger, J.C., *Non-group A rotaviruses*, in *Viral infections of the gastrointestinal tract*, A.Z. Kapikian, Editor. 1994, Marcel Dekker: New York. p. 369-407.
- [103] Brown-Elliott, B.A. and R.J. Wallace, *Clinical and taxonomic status of nonpigmented or late-pigmenting rapidly growing mycobacteria*. *CMRev*, 2002. **15**(4): p. 716-746.
- [104] Bryceson, A., et al., *HIV-2-Associated AIDS in the 1970's*. *Lancet*, 1988. **2**(8604): p. 220-220.
- [105] Buesa, J., et al., *Molecular epidemiology of caliciviruses causing outbreaks and sporadic cases of acute gastroenteritis in Spain*. *J Clin Microbiol*, 2002. **40**(8): p. 2854-9.
- [106] Buller, R.S., et al., *Ehrlichia ewingii, a newly recognized agent of human ehrlichiosis*. *N Engl J Med*, 1999. **341**(3): p. 148-55.
- [107] Bush, L.M., et al., *High-level penicillin resistance among isolates of enterococci. Implications for treatment of enterococcal infections*. *Annals of Internal Medicine*, 1989. **110**(7): p. 515-520.
- [108] Butler, W.R., et al., *Mycobacterium celatum sp. nov.* *Int J Syst Bacteriol*, 1993. **43**(3): p. 539-48.
- [109] Cali, A., et al., *Brachiola vesicularum, n. g., n. sp., a new microsporidium associated with AIDS and myositis*. *J Eukaryot Microbiol*, 1998. **45**(3): p. 240-51.
- [110] Campbell, C.C., *Malaria: an emerging and re-emerging global plague*. *FEMS Immunol Med Microbiol*, 1997. **18**(4): p. 325-31.
- [111] Caprioli, A., et al., *Community-wide outbreak of hemolytic-uremic syndrome associated with non-O157 verocytotoxin-producing Escherichia coli*. *Journal of Infectious Diseases*, 1994. **169**(1): p. 208-211.
- [112] Caprioli, A., et al., *Non-O157 Shiga toxin-producing Escherichia coli infections in Europe*. *Emerging Infectious Diseases*, 1997. **3**(4): p. 578-579.
- [113] Carey, D.E., et al., *Lassa fever. Epidemiological aspects of the 1970 epidemic, Jos, Nigeria*. *Trans R Soc Trop Med Hyg*, 1972. **66**(3): p. 402-8.
- [114] Carman, W.F., et al., *Mutation preventing formation of hepatitis B e antigen in patients with chronic hepatitis B infection*. *Lancet*, 1989. **2**(8663): p. 588-91.
- 115 Casals, J., E.C. Curnew, and L. Thomas, *Venezuelan equine encephalitis in man*. *J Exp Med*, 1943. **77**: p. 521.
- [116] Caugant, D.A., *Population genetics and molecular epidemiology of Neisseria meningitidis*. *APMIS: Acta Pathologica, Microbiologica, et Immunologica Scandinavica*, 1998. **106**(5): p. 505-525.
- [117] Causey, O.R. and O.M. Maroja, *Mayaro virus : a new human disease agent. III Investigation of an epidemic of acute febrile illness on the River Guama in Para, Brazilian isolation of Mayaro virus as a causative agent*. *The American Journal of Tropical Medicine and Hygiene*, 1957. **6**: p. 1017-1023.
- [118] Cerquetti, M., et al., *Invasive type e Haemophilus influenzae disease in Italy*. *Emerging Infectious Diseases*, 2003. **9**(2): p. 258-261.
- [119] Chai, I.H., et al., *[Occurrence of tertian malaria in a male patient who has never been abroad]*. *Korean J Parasitol*, 1994. **32**(3): p. 195-200.
- [120] Chai, J.-J., *Epidemiological studies on cystic echinococcosis in China: a review*. *Biomed Environ Sci*, 1995. **8**: p. 122-136.
- [121] Chang, Y., et al., *Identification of herpesvirus-like DNA sequences in AIDS-associated Kaposi's sarcoma*. *Science*, 1994. **266**(5192): p. 1865-9.
- [122] Chang, F.Y. and M.Y. Chou, *Comparison of pyogenic liver abscesses caused by Klebsiella pneumoniae and non-K. pneumoniae pathogens*. *J Formos Med Assoc*, 1995. **94**(5): p. 232-7.
- [123] Chant, K., et al., *Probable human infection with a newly described virus in the family Paramyxoviridae*. *Emerging Infectious Diseases*, 1998. **4**(2): p. 273-273.
- [124] Chappel, R.J., et al., *Serological titres to Leptospira fainei serovar hurstbridge in human sera in Australia*. *Epidemiol Infect*, 1998. **121**(2): p. 473-5.

- [125] Charrel, R.N. and X. de Lamballerie, *Arenaviruses other than Lassa virus*. Antiviral Research, 2003. **57**(1-2): p. 89-100.
- [126] Chatterjee, S., C.O. Quarcoopome, and A. Apenteng, *Unusual type of epidemic conjunctivitis in Ghana*. The British Journal of Ophthalmology, 1970. **54**(9): p. 628-630.
- [127] Chen, S.M., et al., *Identification of a granulocytotropic Ehrlichia species as the etiologic agent of human disease*. J Clin Microbiol, 1994. **32**(3): p. 589-95.
- [128] Chen, B. and S. Tao, *Arbovirus survey in China in recent ten years*. Chinese Medical Journal, 1996. **109**(1): p. 13-15.
- [129] Chmel, H., *Serratia odorifera biogroup 1 causing an invasive human infection*. J Clin Microbiol, 1988. **26**(6): p. 1244-5.
- [130] Cho, C.T., et al., *Fusarium solani infection during treatment for acute leukemia*. J Pediatr, 1973. **83**(6): p. 1028-31.
- [131] Chodimella, U., et al., *Septicemia and suppuration in a Vietnam veteran*. Hosp Pract (Minneapolis), 1997. **32**(5): p. 219-21.
- [132] Choi, C.M. and E.A. Lerner, *Leishmaniasis as an emerging infection*. J Invest Dermatol Symp Proc, 2001. **6**(3): p. 175-82.
- [133] Chou, T., *Emerging infectious diseases and pathogens*. Nurs Clin North Am, 1999. **34**(2): p. 427-42.
- [134] Christianson, L.C. and H.J. Dewlett, *Pulmonary disease in adults associated with unclassified mycobacteria*. The American Journal of Medicine, 1960. **29**: p. 980-991.
- [135] Christie, A.B., T.H. Chen, and S.S. Elberg, *Plague in camels and goats: their role in human epidemics*. Journal of Infectious Diseases, 1980. **141**(6): p. 724-726.
- [136] Claas, E.C., et al., *Human influenza A H5N1 virus related to a highly pathogenic avian influenza virus*. Lancet, 1998. **351**(9101): p. 472-7.
- [137] Clavel, F., et al., *Isolation of a new human retrovirus from West African patients with AIDS*. Science, 1986. **233**(4761): p. 343-6.
- [138] Collignon, P.J., *Antibiotic resistance*. The Medical Journal of Australia, 2002. **177**(6): p. 325-329.
- [139] Colquhoun, J. and R.S. Weetch, *Resistance to chloramphenicol developing during treatment of typhoid fever*. Lancet, 1950. **2**(22): p. 621-3.
- [140] Comer, J.A., C.D. Paddock, and J.E. Childs, *Urban zoonoses caused by Bartonella, Coxiella, Ehrlichia, and Rickettsia species*. Vector Borne Zoonotic Dis, 2001. **1**(2): p. 91-118.
- [141] Cook, M.A. and J.J. Lopez, Jr., *Serratia odorifera biogroup I: an emerging pathogen*. J Am Osteopath Assoc, 1998. **98**(9): p. 505-507.
- [142] Cossart, Y.E., et al., *Parvovirus-like particles in human sera*. Lancet, 1975. **1**(7898): p. 72-73.
- [143] Coyle, C.M., et al., *Prevalence of microsporidiosis due to Enterocytozoon bienersi and Encephalitozoon (Septata) intestinalis among patients with AIDS-related diarrhea: determination by polymerase chain reaction to the microsporidian small-subunit rRNA gene*. Clinical Infectious Diseases, 1996. **23**(5): p. 1002-1006.
- [144] Craig, P.S., W.M. Scheld, and J.M. Hughes, eds. *Emerging Infections 2*. 1999, ASM Press: Washington, D.C. 234.
- [145] Craig, P.S., W.M. Scheld, and J.M. Hughes, eds. *Emerging Infections 5*. 2001, ASM Press: Washington, D.C. 266.
- [146] Crumpacker, C.S., et al., *Resistance to antiviral drugs of herpes simplex virus isolated from a patient treated with acyclovir*. N Engl J Med, 1982. **306**(6): p. 343-6.
- [147] Culliton, B.J., *Emerging viruses, emerging threat*. Science, 1990. **247**(4940): p. 279-80.
- [148] Dahlstrand, S., O. Ringertz, and B. Zetterberg, *Airborne tularemia in Sweden*. Scand J Infect Dis, 1971. **3**(1): p. 7-16.
- [149] Daly, J.S., et al., *Rochalimaea elizabethae sp. nov. isolated from a patient with endocarditis*. J Clin Microbiol, 1993. **31**(4): p. 872-81.
- [150] Dance, D.A., *Melioidosis: the tip of the iceberg?* Clinical Microbiology Reviews, 1991. **4**(1): p. 52-60.
- [151] Dance, D.A., *Melioidosis as an emerging global problem*. Acta Tropica, 2000. **74**(2-3): p. 115-119.

- [152] Dankner, W.M., et al., *Mycobacterium bovis infections in San Diego: a clinicoepidemiologic study of 73 patients and a historical review of a forgotten pathogen*. *Medicine (Baltimore)*, 1993. **72**(1): p. 11-37.
- [153] Daum, T.E., et al., *Increasing resistance of staphylococcus-areus to ciprofloxacin*. *Antimicrob Agents Chemother*, 1990. **34**: p. 1862-1863.
- [154] Davies, J.R. and J. Lederberg, eds. *Emerging Infectious Diseases from the Global to the Local Perspective: Workshop Summary*. 2001, National Academy Press: Washington, D.C.
- [155] Davis, B.R., et al., *Characterization of biochemically atypical Vibrio cholerae strains and designation of a new pathogenic species, Vibrio mimicus*. *J Clin Microbiol*, 1981. **14**(6): p. 631-9.
- [156] Dawson, J.E., et al., *Isolation and characterization of an Ehrlichia sp. from a patient diagnosed with human ehrlichiosis*. *J Clin Microbiol*, 1991. **29**(12): p. 2741-5.
- [157] de Manzione, N., et al., *Venezuelan hemorrhagic fever: clinical and epidemiological studies of 165 cases*. *Clinical Infectious Diseases*, 1998. **26**(2): p. 308-313.
- [158] Dedet, J.P. and F. Pratlong, *Leishmania, Trypanosoma and monoxenous trypanosomatids as emerging opportunistic agents*. *J Eukaryot Microbiol*, 2000. **47**(1): p. 37-9.
- [159] Dennis, D.T., *Plague*, in *Tropical infectious diseases*, R.L. Guerrant, D.H. Walker, and P.F. Weller, Editors. 1999, Churchill Livingstone: Philadelphia. p. 506-516.
- [160] Dennis, D.T. and J.L. Gage, *Plague*, in *Infectious Diseases*, D. Armstrong and J. Cohen, Editors. 1999, Mosby, Armstrong, and Cohen: London.
- [161] Denton, M. and K.G. Kerr, *Microbiological and clinical aspects of infection associated with Stenotrophomonas maltophilia*. *Clinical Microbiology Reviews*, 1998. **11**(1): p. 57-80.
- [162] Desportes-Livage, I., et al., *Occurrence of a new microsporidian Enterocytozoon bienewisi n.g., n.sp., in the enterocytes of a human patient with AIDS*. *J Protozool*, 1985. **32**: p. 250-254.
- [163] Desselberger, U., *Emerging and re-emerging infectious diseases*. *J Infect*, 2000. **40**(1): p. 3-15.
- [164] Didier, E.S., et al., *Isolation and characterization of a new human microsporidian, Encephalitozoon hellem (n. sp.), from three AIDS patients with keratoconjunctivitis*. *Journal of Infectious Diseases*, 1991. **163**(3): p. 617-621.
- [165] DiSalvo, A.F., A.M. Fickling, and L. Ajello, *Infection caused by Penicillium marneffeii: description of first natural infection in man*. *American Journal of Clinical Pathology*, 1973. **60**(2): p. 259-263.
- [166] Dollard, S.C. and P.E. Pellett, *Human herpesvirus 6, 7 and 8*. *Rev Med Microbiol*, 2000. **11**(1): p. 1-13.
- [167] Doolittle, R.F., et al., *Origins and evolutionary relationships of retroviruses*. *Q Rev Biol*, 1989. **64**(1): p. 1-30.
- [168] Dorn, C.R., et al., *Properties of Vero cytotoxin-producing Escherichia coli of human and animal origin belonging to serotypes other than O157:H7*. *Epidemiol Infect*, 1989. **103**(1): p. 83-95.
- [169] Downing, R.G., et al., *Isolation of human lymphotropic herpesviruses from Uganda*. *Lancet*, 1987. **2**(8555): p. 390.
- [170] Drancourt, M., *Tropheryma whippelii, an emerging intracellular pathogen causing Whipple disease*. *Presse Med*, 1999. **28**(8): p. 435-9, 433.
- [171] Durand, D.V., et al., *Whipple disease. Clinical review of 52 cases. The SNFMI Research Group on Whipple Disease. Societe Nationale Francaise de Medecine Interne*. *Medicine (Baltimore)*, 1997. **76**(3): p. 170-84.
- [172] Ebricht, J.R., N. Penugonda, and W. Brown, *Clinical experience with Staphylococcus lugdunensis bacteremia: a retrospective analysis*. *Diagnostic Microbiology and Infectious Disease*, 2004. **48**(1): p. 17-21.
- [173] Ecker, M., et al., *Sequence analysis and genetic classification of tick-borne encephalitis viruses from Europe and Asia*. *J Gen Virol*, 1999. **80** ( Pt 1): p. 179-85.
- [174] Eckert, J., F.J. Conraths, and K. Tackmann, *Echinococcosis: an emerging or re-emerging zoonosis?* *Int J Parasitol*, 2000. **30**(12-13): p. 1283-94.



- [175] Eckert, J., et al., *Geographic distribution and prevalence*, in *WHO/OIE manual on echinococcosis in humans and animals: a public health problem of global concern*, J. Eckert, et al., Editors. 2001, WHO: Geneva.
- [176] El Haouri, M., et al., *Cutaneous filariasis Loa Loa: 26 moroccan cases of importation*. *Annales de Dermatologie et de Vénérologie*, 2001. **128**(8-9): p. 899-902.
- [177] Eliopoulos, G.M., et al., *High-level resistance to gentamicin in clinical isolates of Streptococcus (Enterococcus) faecium*. *Antimicrobial Agents and Chemotherapy*, 1988. **32**(10): p. 1528-1532.
- [178] Elliott, S.P., R. Yogev, and S.T. Shulman, *Staphylococcus lugdunensis: An emerging cause of ventriculoperitoneal shunt infections*. *Pediatric Neurosurgery*, 2001. **35**: p. 128-130.
- [179] Endtz, H.P., et al., *Quinolone resistance in campylobacter isolated from man and poultry following the introduction of fluoroquinolones in veterinary medicine*. *J Antimicrob Chemother*, 1991. **27**(2): p. 199-208.
- [180] Engberg, J., et al., *Quinolone and macrolide resistance in Campylobacter jejuni and C. coli: resistance mechanisms and trends in human isolates*. *Emerging Infectious Diseases*, 2001. **7**(1): p. 24-34.
- [181] Enría, D.A., A.M. Briggiler, and M.R. Feuillade, *An overview of the epidemiological, ecological and preventive hallmarks of Argentine haemorrhagic fever (Junin virus)*. *Bulletin de l'Institut Pasteur*, 1998. **96**: p. 103-114.
- [182] Erice, A., et al., *Progressive disease due to ganciclovir-resistant cytomegalovirus in immunocompromised patients*. *N Engl J Med*, 1989. **320**(5): p. 289-93.
- [183] EU, *Opinion of the Scientific Committee on Veterinary Measures relating to Public Health - Allergic reactions to ingested Anisakis Simplex antigens and evaluation of the possible risk to human health*. 1998, European Commission.
- [184] Falkinham, J.O., 3rd, *Epidemiology of infection by nontuberculous mycobacteria*. *Clinical Microbiology Reviews*, 1996. **9**(2): p. 177-215.
- [185] Falkow, S., *Infectious multiple drug resistance*. 1975, London: Pion Limited.
- [186] Farge, D., et al., *Human herpes virus-8 and other risk factors for Kaposi's sarcoma in kidney transplant recipients. Groupe Cooperatif de Transplantation d' Ile de France (GCIF)*. *Transplantation*, 1999. **67**(9): p. 1236-42.
- [187] Featherstone, D., D. Brown, and R. Sanders, *Development of the Global Measles Laboratory Network*. *Journal of Infectious Diseases*, 2003. **187 Supp 1**: p. 264-269.
- [188] Fedra, K., L. Winkelbauer, and V.R. Pantulu, *Expert Systems for Environmental Screening. An Application in the Lower Mekong Basin*. 1991, Laxenburg, Austria: International Institute for Applied Systems Analysis. 169p.
- [189] Feinstone, S.M., et al., *Transfusion-associated hepatitis not due to viral hepatitis type A or B*. *N Engl J Med*, 1975. **292**(15): p. 767-70.
- [190] Fennell, C.L., et al., *Characterization of Campylobacter-like organisms isolated from homosexual men*. *Journal of Infectious Diseases*, 1984 **149**(1): p. 58-66.
- [191] Ferraroni, J.J., J.A.N. Melo, and M.E. Camargo, *Molestia de Chagas na Amazônia. Ocorrência de seis casos suspeitos, autóctones, sorologicamente positivos*. *Acta Amazônica*, 1977. **3**: p. 438-439.
- [192] Field, A.S., et al., *Myositis associated with a newly described microsporidian, Trachipleistophora hominis, in a patient with AIDS*. *J Clin Microbiol*, 1996. **34**(11): p. 2803-11.
- [193] Field, H., B. McCall, and J. Barrett, *Australian bat lyssavirus infection in a captive juvenile black flying fox*. *Emerging Infectious Diseases*, 1999. **5**(3): p. 438-440.
- [194] Field, H.J., *Herpes simplex virus antiviral drug resistance--current trends and future prospects*. *J Clin Virol*, 2001. **21**(3): p. 261-9.
- [195] Fisher-Hoch, S.P., et al., *Review of cases of nosocomial Lassa fever in Nigeria: the high price of poor medical practice*. *British Medical Journal*, 1995. **311**(7009): p. 857-859.
- [196] Fitzgibbon, J.E., et al., *Human immunodeficiency virus type 1 pol gene mutations which cause decreased susceptibility to 2',3'-dideoxycytidine*. *Antimicrobial Agents and Chemotherapy*, 1992. **36**(1): p. 153-157.
- [197] Fleming, I.A., et al., *Effects of domestication on growth physiology and endocrinology of Atlantic salmon (Salmo salar)*. *Can. J. Fish. Aquat. Sci.*, 2002. **59**: p. 1323-1330.



- [198] Fluit, A.C., F.J. Schmitz, and J. Verhoef, *Multi-resistance to antimicrobial agents for the ten most frequently isolated bacterial pathogens*. *Int J Antimicrob Agents*, 2001. **18**(2): p. 147-60.
- [199] Force, N.M.-T.T., *National Action Plan to Combat MDR-TB*. 1992, CDC: Atlanta.
- [200] Fournier, P.E., et al., *Evidence of Rickettsia helvetica infection in humans, eastern France*. *Emerging Infectious Diseases*, 2000. **6**(4): p. 389-392.
- [201] Fournier, P.E., et al., *Genetic identification of rickettsiae isolated from ticks in Japan*. *J Clin Microbiol*, 2002. **40**(6): p. 2176-81.
- [202] Frame, J.D., et al., *Lassa fever, a new virus disease of man from West Africa. I. Clinical description and pathological findings*. *The American Journal of Tropical Medicine and Hygiene*, 1970. **19**(4): p. 670-676.
- [203] Freney, J., et al., *Staphylococcus lugdunensis sp. nov. and Staphylococcus schleiferi sp. nov., two species from human clinical specimens*. *Int J Syst Bacteriol*, 1988. **38**: p. 168-172.
- [204] Frenkel, N., et al., *Isolation of a new herpesvirus from human CD4+ T cells*. *Proc Natl Acad Sci U S A*, 1990. **87**(2): p. 748-52.
- [205] Friedman-Kein, A.E., L. Laubenstein, and M. Marmor, *Kaposi's sarcoma and Pneumocystis pneumonia among homosexual men--New York City and California*. *MMWR Morb Mortal Wkly Rep*, 1981. **30**(25): p. 305-8.
- [206] Fuller, J.D., et al., *Streptococcus iniae virulence is associated with a distinct genetic profile*. *Infect Immun*, 2001. **69**(4): p. 1994-2000.
- [207] Fung, C.P., et al., *A global emerging disease of Klebsiella pneumoniae liver abscess: is serotype K1 an important factor for complicated endophthalmitis?* *Gut*, 2002. **50**(3): p. 420-4.
- [208] Gage, K.L., et al., *Cases of cat-associated human plague in the Western US, 1977-1998*. *Clinical Infectious Diseases*, 2000. **30**(6): p. 893-900.
- [209] Galimand, M., et al., *Multidrug resistance in Yersinia pestis mediated by a transferable plasmid*. *N Engl J Med*, 1997. **337**(10): p. 677-80.
- [210] Gaynes, R.P. and D.H. Culver, *Resistance to imipenem among selected gram-negative bacilli in the United States*. *Infect Control Hosp Epidemiol*, 1992. **13**(1): p. 10-14.
- [211] Geiger, A.M., M. Hogardt, and J. Heesemann, *Burkholderia/Stenotrophomonas*, in *Emerging Bacterial Pathogens*, A. Schmidt, Editor. 2001, Karger: Basel. p. 20-34.
- [212] Gerding, D.N., et al., *Clostridium difficile-associated diarrhea and colitis*. *Infect Control Hosp Epidemiol* 1995. **16**: p. 459-477.
- [213] Ghinelli, F. and M. Libanore, *Vector-borne diseases. Recent advances in the diagnosis, treatment and prevention*. *Recenti Prog Med*, 2002. **93**(1): p. 45-57.
- [214] Gill, G.V. and D.R. Bell, *Strongyloides stercoralis infection in former Far East prisoners of war*. *British Medical Journal*, 1979. **2**(6190): p. 572-574.
- [215] Gillett, J.D., et al., *O'nyong nyong fever: an epidemic virus disease in East Africa*. 1960, *East Afr Virus Res Inst: Entebbe, Uganda*. p. 9-11.
- [216] Giordano, M.O., et al., *Diarrhea and enteric emerging viruses in HIV-infected patients*. *AIDS Research and Human Retroviruses*, 1999. **15**(16): p. 1427-1432.
- [217] Goldmann, D.A. and J.D. Klinger, *Pseudomonas cepacia: biology, mechanisms of virulence, epidemiology*. *J Pediatr*, 1986. **108**(5 Pt 2): p. 806-812.
- [218] Golub, B., G. Falk, and W.W. Spink, *Lung abscess due to Corynebacterium equi. Report of first human infection*. *Annals of Internal Medicine*, 1967. **66**(6): p. 1174-1177.
- [219] Gomez-Lus, R., et al., *Emerging and reemerging pathogens*. *Int J Antimicrob Agents*, 2000. **16**(3): p. 335-9.
- [220] Gonzales, E.P., R.M. Crosby, and S.H. Walker, *Mycobacterium aquae infection in a hydrocephalic child (Mycobacterium aquae meningitis)*. *Pediatrics*, 1971. **48**(6): p. 974-7.
- [221] Gonzales, R.D., et al., *Infections due to vancomycin-resistant Enterococcus faecium resistant to linezolid*. *Lancet*, 2001. **357**(9263): p. 1179.
- [222] Gonzalez, J.P., A. Sanchez, and R. Rico-Hesse, *Molecular phylogeny of Guanarito virus, an emerging arenavirus affecting humans*. *The American Journal of Tropical Medicine and Hygiene*, 1995. **53**(1): p. 1-6.

- [223] Gonzalez, J.P., et al., *Genetic characterization and phylogeny of Sabia virus, an emergent pathogen in Brazil*. *Virology*, 1996. **221**(2): p. 318-324.
- [224] Gottlieb, M.S., et al., *Pneumocystis carinii pneumonia and mucosal candidiasis in previously healthy homosexual men: evidence of a new acquired cellular immunodeficiency*. *N Engl J Med*, 1981. **305**(24): p. 1425-31.
- [225] Goulet, V., et al., *Effect of prevention measures on incidence of human listeriosis, France, 1987-1997*. *Emerging Infectious Diseases*, 2001. **7**(6): p. 983-989.
- [226] Grange, J.M., *Mycobacterium chelonae*. *Tubercule*, 1981. **62**: p. 273-276.
- [227] Gratten, M., S. Naraqi, and D. Hansman, *High prevalence of penicillin-insensitive pneumococci in Port Moresby, Papua New Guinea*. *Lancet*, 1980. **2**(8187): p. 192-5.
- [228] Gratz, N.G., *Emerging and resurging vector-borne diseases*. *Annual Review of Entomology*, 1999. **44**: p. 51-75.
- [229] Graves, S. and J. Stenos, *Rickettsia honei: a spotted fever group Rickettsia on three continents*. *Annals of the New York Academy of Sciences*, 2003. **990**: p. 62-66.
- [230] Grayson, M.L., et al., *Increasing resistance to beta-lactam antibiotics among clinical isolates of Enterococcus faecium: a 22-year review at one institution*. *Antimicrobial Agents and Chemotherapy*, 1991. **35**(11): p. 2180-2184.
- [231] Grayston, J.T., et al., *A new Chlamydia psittaci strain, TWAR, isolated in acute respiratory tract infections*. *N Engl J Med*, 1986. **315**(3): p. 161-8.
- [232] Greenberg, M., O.J. Pellitteri, and W.L. Jellison, *Rickettsialpox—a newly recognized rickettsial disease*. *American Journal of Public Health*, 1947. **37**: p. 860-868.
- [233] Grimstad, P.R., et al., *A case of encephalitis in a human associated with a serologic rise to Jamestown Canyon virus*. *The American Journal of Tropical Medicine and Hygiene*, 1982. **31**(6): p. 1238-1244.
- [234] Grimstad, P.R., *California group virus disease*, in *Arboviruses: epidemiology and ecology*, T.P. Monath, Editor. 1988, CRC Press: Boca Raton. p. 100-127.
- [235] Gritsun, T.S., P.A. Nuttall, and E.A. Gould, *Tick-borne flaviviruses*. *Advances in Virus Research* 2003. **61**: p. 317-371.
- [236] Gritsun, T.S., V.A. Lashkevich, and E.A. Gould, *Tick-borne encephalitis*. *Antiviral Research*, 2003. **57**(1-2): p. 129-146.
- [237] Gubler, D.J., *Dengue*, in *Arboviruses: epidemiology and ecology*, T.P. Monath, Editor. 1988, CRC Press: Boca Raton. p. 223-253.
- [238] Gubler, D.J., *Resurgent vector-borne diseases as a global health problem*. *Emerging Infectious Diseases*, 1998. **4**(3): p. 442-450.
- [239] Gunzburg, S., et al., *Haemolytic-uraemic syndrome and verocytotoxigenic Esch. coli*. *Med J Aust*, 1988. **149**(1): p. 54-5.
- [240] Gupta, A., *Multidrug-resistant typhoid fever in children: epidemiology and therapeutic approach*. *Pediatr Infect Dis J*, 1994. **13**(2): p. 134-40.
- [241] Gur, H., et al., *Disseminated mycobacterial disease caused by Mycobacterium szulgai*. *Archives of Internal Medicine*, 1984. **144**(9): p. 1861-1863.
- [242] Gurtler, V., et al., *Nocardia veterana sp. nov., isolated from human bronchial lavage*. *Int J Syst Evol Microbiol*, 2001. **51**(Pt 3): p. 933-6.
- [243] Gutmann, L., S.M. Chou, and R.S. Pore, *Fusariosis, myasthenic syndrome, and aplastic anemia*. *Neurology*, 1975. **25**(10): p. 922-6.
- [244] Haake, D.A., et al., *Leptospirosis, water sports, and chemoprophylaxis*. *Clinical Infectious Diseases*, 2002. **34**(9): p. e40-43.
- [245] Haglund, M., et al., *Report of the Meningitis Program of the International Scientific Working Group on TBE. Serological screening of patients with viral CNS-infection of unknown etiology in search of undiagnosed TBE cases*. *Vaccine*, 2003. **21 Suppl 1**: p. S66-72.
- [246] Hakim, S.Z. and R.M. Genta, *Fatal disseminated strongyloidiasis in a Vietnam War veteran*. *Archives of Pathology and Laboratory Medicine*, 1986. **110**(9): p. 809-812.
- [247] Hall, C.B., *Human herpesviruses at sixes, sevens, and more*. *Annals of Internal Medicine*, 1997. **127**(6): p. 481-483.
- [248] Hall, R.A., et al., *The ecology and epidemiology of Kunjin virus*. *Current Topics in Microbiology and Immunology*, 2002. **267**: p. 253-69.

- [249] Hammon, W.M. and W.C. Reeves, *California encephalitis virus, a newly described agent. 1. Evidence of natural infection in man and other animals*. California Medicine, 1952. **77**: p. 303-309.
- [250] Hammon, W.M., A. Rudnick, and G.E. Sather, *Viruses associated with epidemic hemorrhagic fevers of the Philippines and Thailand*. Science, 1960. **131**: p. 1102-3.
- [251] Hanna, J.N., et al., *An outbreak of Japanese encephalitis in the Torres Strait, Australia, 1995*. Med J Aust, 1996. **165**(5): p. 256-60.
- [252] Hansman, D. and G. Andrews, *Hospital infection with pneumococci resistant to tetracycline*. Med J Aust, 1967. **1**(10): p. 498-501.
- [253] Harb, M., et al., *The resurgence of lymphatic filariasis in the Nile delta*. Bull World Health Organisation, 1993. **71**(1): p. 49-54.
- [254] Haristoy, X., et al., *Francisella tularensis bacteremia*. J Clin Microbiol, 2003. **41**(6): p. 2774-6.
- [255] Harp, J.A., *Parasitic infections of the gastrointestinal tract*. Current Opinion in Gastroenterology., 2003. **19**(1): p. 31-36.
- [256] Hart, C.A. and C. Winstanley, *Pseudomonas and all that*. Archives of Disease in Childhood, 1999. **81**(1): p. 2-4.
- [257] Hashimoto, H., et al., *Epidemic of gastrointestinal tract infection including hemorrhagic colitis attributable to Shiga toxin 1-producing Escherichia coli O118:H2 at a junior high school in Japan*. Pediatrics, 1999. **103**(1): p. E2.
- [258] Hassan, I.S. and E.L. Ong, *Fever in the returned traveller. Remember murine typhus!* J Infect, 1995. **31**(2): p. 173-4.
- [259] Hassig, A., J. Karrer, and F. Pusterla, Schweiz Med Wschr, 1949. **79**: p. 971-973.
- [260] Hawkes, R.A., et al., *Barmah Forest virus infections in humans in New South Wales*. Med J Aust, 1987. **146**(11): p. 569-73.
- [261] Hazen, K.C., *New and emerging yeast pathogens*. Clinical Microbiology Reviews, 1995. **8**(4): p. 462-78.
- [262] Hertig, M., *Sandfly fever. Part 1: History, incidence, prevention, and control*, in *Preventive Medicine in WW2*, E. Hoff, Editor. 1964, Office of the Surgeon General, US Dept of the Army: Washington, D. C. p. 109-32.
- [263] Heymann, D.L., M. Szczeniowski, and K. Esteves, *Re-emergence of monkeypox in Africa: a review of the past six years*. British Medical Bulletin, 1998. **54**(3): p. 693-702.
- [264] Hirakata, Y., et al., *Rapid detection and evaluation of clinical characteristics of emerging multiple-drug-resistant gram-negative rods carrying the metallo-beta-lactamase gene blaIMP*. Antimicrobial Agents and Chemotherapy, 1998. **42**(8): p. 2006-2011.
- [265] Hoch, A.L., D.R. Roberts, and F.D. Pinheiro, *Breeding sites of Culicoides paraensis and options for control by environmental management*. Bulletin of the Pan American Health Organization., 1986. **20**(3): p. 284-293.
- [266] Hohl, P.E., et al., *Infections due to Wangiella dermatitidis in humans: report of the first documented case from the United States and a review of the literature*. Rev Infect Dis, 1983. **5**(5): p. 854-64.
- [267] Hollister, W.S., et al., *Development and ultrastructure of Trachipleistophora hominis n.g., n.sp. after in vitro isolation from an AIDS patient and inoculation into athymic mice*. Parasitology, 1996. **112 ( Pt 1)**: p. 143-54.
- [268] Holt, R.J. and A. Azmi, *Miconazole-resistant Candida*. Lancet, 1978. **1**(8054): p. 50-51.
- [269] Homer, M.J., et al., *Babesiosis*. Clinical Microbiology Reviews, 2000. **13**(3): p. 451-469.
- [270] Hong, Z., S. Zou, and A. Giulivi, *Cytomegalovirus, Herpesvirus 6, 7, and 8, and Parvovirus B19 in Canada*. Canada Communicable Disease Report, 2001. **27S3**.
- [271] Hopewell, P.C., *Impact of human immunodeficiency virus infection on the epidemiology, clinical features, management, and control of tuberculosis*. Clinical Infectious Diseases, 1992. **15**(3): p. 540-547.
- [272] Horn, R., et al., *Fungemia in a cancer hospital: changing frequency, earlier onset, and results of therapy*. Rev Infect Dis, 1985. **7**(5): p. 646-55.
- [273] Horodniceanu, T., et al., *High-level, plasmid-borne resistance to gentamicin in Streptococcus faecalis subsp. zymogenes*. Antimicrobial Agents and Chemotherapy, 1979. **16**(5): p. 686-689.

- [274] Horsburgh, C.R., Jr. and C.H. Kirkpatrick, *Long-term therapy of chronic mucocutaneous candidiasis with ketoconazole: experience with twenty-one patients*. The American Journal of Medicine, 1983. **74**(1B): p. 23-29.
- [275] Howard, C.R., *Hepatitis viruses: A Pandora's box?* Journal of Gastroenterology and Hepatology, 2002. **17**: p. S464.
- [276] Hoy, J., et al., *Trichosporon beigeli infection: a review*. Rev Infect Dis, 1986. **8**(6): p. 959-67.
- [277] Hsueh, P.R., et al., *Melioidosis: an emerging infection in Taiwan?* Emerging Infectious Diseases, 2001. **7**(3): p. 428-433.
- [278] Hsueh, P.R., et al., *Pandrug-resistant Acinetobacter baumannii causing nosocomial infections in a university hospital, Taiwan*. Emerging Infectious Diseases, 2002. **8**(8): p. 827-832.
- [279] Hu, Z., *Epidemiology of meningococcal disease in China*, in *Evolution of meningococcal diseases*, N.A. Vedros, Editor. 1987, CRC Press: Boca Raton.
- [280] Huailu, C., et al., *Large-scale spraying of bednets to control mosquito vectors and malaria in Sichuan, China*. Bull World Health Organisation, 1995. **73**: p. 321-8.
- [281] Hugh, R. and E. Ryschenkow, *Pseudomonas maltophilia, an alcaligenes-like species*. J Gen Microbiol, 1961. **26**: p. 123-32.
- [282] Hughes, P. and J. Heritage, *Antibiotic Growth-Promoters in Food Animals*. AGRIPPA, 2004: p. [http://www.fao.org/DOCREP/ARTICLE/AGRIPPA/555\\_EN.HTM](http://www.fao.org/DOCREP/ARTICLE/AGRIPPA/555_EN.HTM).
- [283] Hurwitz, E.S., D. Johnson, and C.C. Campbell, *Resistance of Plasmodium falciparum malaria to sulfadoxine-pyrimethamine ('Fansidar') in a refugee camp in Thailand*. Lancet, 1981. **1**(8229): p. 1068-70.
- [284] Indar-Harrinauth, L., et al., *Emergence of Salmonella enteritidis phage type 4 in the Caribbean: case-control study in Trinidad and Tobago, West Indies*. Clinical Infectious Diseases, 2001. **32**(6): p. 890-896.
- [285] Inman, P.M., et al., *Outbreak of injection abscesses due to Mycobacterium abscessus*. Archives of Dermatology, 1969. **100**(2): p. 141-147.
- [286] Ishii, A., M. Tsuji, and I. Tada, *History of Katayama disease: schistosomiasis japonica in Katayama district, Hiroshima, Japan*. Parasitol Int., 2003. **52**(4): p. 313-319.
- [287] Ito, A., et al., *Control of echinococcosis and cysticercosis: a public health challenge to international cooperation in China*. Acta Tropica, 2003. **86**(1): p. 3-17.
- [288] Jackman, P.J.H., et al., *Classification of corynebacteria associated with endocarditis (group JK) as Corynebacterium jeikeium sp. nov.* Syst Appl Microbiol, 1987. **9**(83-90).
- [289] Jackson, L.A., et al., *Prevalence of Neisseria meningitidis relatively resistant to penicillin in the United States, 1991*. Meningococcal Disease Study Group. Journal of Infectious Diseases, 1994. **169**(2): p. 438-441.
- [290] Jacobs, M.R., et al., *Emergence of multiply resistant pneumococci*. N Engl J Med, 1978. **299**(14): p. 735-40.
- [291] Jacobs, M.R., *Drug-resistant Streptococcus pneumoniae: rational antibiotic choices*. The American Journal of Medicine, 1999. **106**(5A): p. 19-52.
- [292] Jacobs-Reitsma, W.F., et al., *In vitro susceptibility of Campylobacter and Salmonella isolates from broilers to quinolones, ampicillin, tetracycline, and erythromycin*. Vet Q, 1994. **16**(4): p. 206-8.
- [293] Janda, J.M., et al., *Current perspectives on the epidemiology and pathogenesis of clinically significant Vibrio spp.* Clinical Microbiology Reviews, 1988. **1**(3): p. 245-267.
- [294] Jatoi, A., et al., *A prospective survey for central line skin-site colonization by the pathogen Malassezia furfur among hospitalized adults receiving total parenteral nutrition*. JPEN J Parenter Enteral Nutr, 1997. **21**(4): p. 230-2.
- [295] Jean-Jacques, W., et al., *Vibrio metschnikovii bacteremia in a patient with cholecystitis*. J Clin Microbiol, 1981. **14**(6): p. 711-2.
- [296] Jernigan, J.A., et al., *Bioterrorism-related inhalational anthrax: the first 10 cases reported in the United States*. Emerging Infectious Diseases, 2001. **7**(6): p. 933-44.
- [297] Jesudason, M.V., et al., *Burkholderia pseudomallei: an emerging pathogen in India*. Indian J Med Microbiol, 1997. **15**(1): p. 1-2.



- [298] Jevons, M.P., "Celbenin" resistant staphylococci. *British Medical Journal*, 1961. **1**: p. 124-125.
- [299] Jobin, W., *Dams and Disease; Ecological Design and Health Impact of Large Dams and Irrigation Systems*. 1999, London: Spon Press. 544.
- [300] John, T.J., *Emerging & re-emerging bacterial pathogens in India*. *Indian J Med Res*, 1996. **103**: p. 4-18.
- [301] Johnson, W.D. and D. Kaye, *Serious infections caused by diphtheroids*. *Annals of the New York Academy of Sciences*, 1970. **174**(2): p. 568-576.
- [302] Johnson, R.T., *The Soriano Award Lecture. Emerging infections of the nervous system*. *J Neurol Sci*, 1994. **124**(1): p. 3-14.
- [303] Johnson, A.M., et al., *Laguna Negra virus associated with HPS in western Paraguay and Bolivia*. *Virology*, 1997. **238**(1): p. 115-27.
- [304] Jong, E. *Travel and emerging infections*. [cited 2004 2/13]; Available from: <http://depts.washington.edu/eminf/2002/mod1topic3/>.
- [305] Joseph, S.W., R.R. Colwell, and J.B. Kaper, *Vibrio parahaemolyticus and related halophilic Vibrios*. *Critical Reviews in Microbiology*, 1982. **10**(1): p. 77-124.
- [306] Jupp, P.G. and B.M. McIntosh, *Chikungunya virus disease*, in *Arboviruses: epidemiology and ecology*, T.P. Monath, Editor. 1988, CRC Press: Boca Raton. p. 1137-1152.
- [307] Kapikian, A.Z., et al., *Visualization by immune electron microscopy of a 27-nm particle associated with acute infectious nonbacterial gastroenteritis*. *J Virol*, 1972. **10**(5): p. 1075-1081.
- [308] Karch, H., C. Geitz, and H. Schmidt, *Increased Incidence of Infections with EHEC O103:H2*. *Notiziario dell'Istituto Superiore di Sanita*, 1997. **10**(3): p. 2.
- [309] Karmali, M.A., *Infection by verocytotoxin-producing Escherichia coli*. *Clinical Microbiology Reviews*, 1989. **2**(1): p. 15-38.
- [310] Karras, D.J., *Update on emerging infections: news from the Centers for Disease Control and Prevention. Pertussis--United States, 1997-2000*. *Annals of Emergency Medicine*, 2002. **40**(1): p. 115-119.
- [311] Kavlick, M.F., et al., *Emergence of multi-dideoxynucleoside-resistant human immunodeficiency virus type 1 variants, viral sequence variation, and disease progression in patients receiving antiretroviral chemotherapy*. *Journal of Infectious Diseases*, 1998. **177**(6): p. 1506-1513.
- [312] Kelly, P., et al., *African tick-bite fever: a new spotted fever group rickettsiosis under an old name*. *Lancet*, 1992. **340**(8825): p. 982-983.
- [313] Kelly, P.J., et al., *Rickettsia africae sp. nov., the etiological agent of African tick bite fever*. *Int J Syst Bacteriol*, 1996. **46**(2): p. 611-4.
- [314] Kiernan, F.A., *The blood fluke that saved Formosa*. *Harpers Magazine*, 1959: p. 45-47.
- [315] Kilbourne, E.D., *The emergence of "emerging diseases": a lesson in holistic epidemiology*. *Mt Sinai J Med*, 1996. **63**(3-4): p. 159-166.
- [316] Kilgore, P.E., et al., *Prospects for the control of Bolivian hemorrhagic fever*. *Emerging Infectious Diseases*, 1995. **1**(3): p. 97-100.
- [317] King, E.O., *Human infections with Vibrio fetus and a closely related vibrio*. *Journal of Infectious Diseases*, 1957. **101**(2): p. 119-128.
- [318] King, A.J., *Penicillin resistance in gonorrhoea*. *The British Journal of Venereal Diseases*, 1960. **36**: p. 34-35.
- [319] Kirkwood, C., et al., *Rotavirus serotype G9P[8] and acute gastroenteritis outbreak in children, Northern Australia*. *Emerging Infectious Diseases*, 2004. **10**(9): p. 1593-600.
- [320] Kirkwood, C., *Viral gastroenteritis in Europe: a new norovirus variant?* *Lancet*, 2004. **363**(9410): p. 671-2.
- [321] Kjemtrup, A.M. and P.A. Conrad, *Human babesiosis: an emerging tick-borne disease*. *Int J Parasitol*, 2000. **30**(12-13): p. 1323-37.
- [322] Klein, A.S., et al., *Hansenula anomala: a new fungal pathogen. Two case reports and a review of the literature*. *Archives of Internal Medicine*, 1988. **148**(5): p. 1210-1213.
- [323] Kluytmans, J., et al., *Outbreak of Staphylococcus schleiferi wound infections: strain characterization by randomly amplified polymorphic DNA analysis, PCR ribotyping*,



- conventional ribotyping, and pulsed-field gel electrophoresis.* J Clin Microbiol, 1998. **36**(8): p. 2214-2219.
- [324] Knothe, H., M. Antal, and V. Krcmery, *Imipenem and ceftazidime resistance in Pseudomonas aeruginosa and Klebsiella pneumoniae.* J Antimicrob Chemother, 1987. **19**(1): p. 136-8.
- [325] Knox, K.K., W.R. Drobyski, and D.R. Carrigan, *Cytomegalovirus isolate resistant to ganciclovir and foscarnet from a marrow transplant patient.* Lancet, 1991. **337**(8752): p. 1292-3.
- [326] Kostrzewski, J., *The epidemiology of trench fever.* Bulletin International De L Academie Polonaise Des Sciences Et Des Lettres, Classe De Medecine, 1949. **7**: p. 233-263.
- [327] Kudoh, Y., et al., *Epidemiological Surveys on Verocytotoxin-Producing Escherichia coli Infections in Japan*, in *Recent Advances in Verocytotoxin-producing Escherichia Coli Infections*, M.A. Karmali and A.G. Goglio, Editors. 1994, Elsevier Science: Amsterdam, The Netherlands. p. 53-56.
- [328] Labrique, A.B., et al., *Hepatitis E: an emerging infectious disease.* Epidemiol Rev, 1999. **21**(2): p. 162-79.
- [329] Ladnyj, I.D., P. Ziegler, and E. Kima, *A human infection caused by monkeypox virus in Basankusu Territory, Democratic Republic of the Congo.* Bull World Health Organisation, 1972. **46**(5): p. 593-7.
- [330] Lakos, A., *Tick-borne lymphadenopathy--a new rickettsial disease?* Lancet, 1997. **350**(9083): p. 1006.
- [331] Larder, B.A., G. Darby, and D.D. Richman, *HIV with reduced sensitivity to zidovudine (AZT) isolated during prolonged therapy.* Science, 1989. **243**(4899): p. 1731-4.
- [332] Larrieu, E., et al., *Evaluation of the losses produced by hydatidosis and cost/benefit analysis of different strategic interventions of control in the Province of Rio Negro, Argentina.* Boletín Chileno de Parasitología, 2000. **55**(1-2): p. 8-13.
- [333] Lashley, F.R. and J.D. Durham, eds. *Emerging Infectious Diseases: Trends and Issues.* 2002, Springer Publishing Company: New York, NY. 483.
- [334] Le Guenno, B., et al., *Isolation and partial characterisation of a new strain of Ebola virus.* Lancet, 1995. **345**: p. 1271-1274.
- [335] Leclercq, R., et al., *Plasmid-mediated resistance to vancomycin and teicoplanin in Enterococcus faecium.* N Engl J Med, 1988. **319**(3): p. 157-61.
- [336] Lederberg, J., R.E. Shope, and S.C. Oaks, Jr., eds. *Emerging infections: microbial threats to health in the United States.* 1992, National Academy Press: Washington, D.C. 312.
- [337] LeDuc, J.W., et al., *A retrospective analysis of sera collected by the Hemorrhagic Fever Commission during the Korean Conflict.* Journal of Infectious Diseases, 1990. **162**(5): p. 1182-1184.
- [338] Lee, J.V., et al., *Taxonomy and description of Vibrio fluvialis sp. nov. (synonym group F vibrios, group EF6).* J Appl Bacteriol, 1981. **50**(1): p. 73-94.
- [339] Lemey, P., et al., *Tracing the origin and history of the HIV-2 epidemic.* Proc Natl Acad Sci U S A, 2003. **100**(11): p. 6588-92.
- [340] Levett, P.N., *Leptospirosis.* Clinical Microbiology Reviews, 2001. **14**(2): p. 296-326.
- [341] Levy, J.A., *Three new human herpesviruses (HHV6, 7, and 8).* Lancet, 1997. **349**(9051): p. 558-63.
- [342] Levy, S.B., *The Antibiotic Paradox.* 2002, Cambridge, MA: Perseus Publishing.
- [343] Lewis, R. *The rise of antibiotic-resistant infections.* [cited 2004 5/5]; Available from: [www.fda.gov/fdac/features/795\\_antibio.html](http://www.fda.gov/fdac/features/795_antibio.html).
- [344] Lim, H.S. and H.S. Kim, *Evaluation of diagnostic methods of re-emerging malaria in Korean patients.* Yonsei Med J, 2001. **42**(1): p. 84-90.
- [345] Lin, T.Y., et al., *Enterovirus 71 outbreaks, Taiwan: occurrence and recognition.* Emerging Infectious Diseases, 2003. **9**(3): p. 291-3.
- [346] Lindsay, M., et al., *Emergence of Barmah Forest virus in Western Australia.* Emerging Infectious Diseases, 1995. **1**(1): p. 22-6.
- [347] Linell, F. and A. Norden, *Mycobacterium balnei: a new acid fast bacillus occurring in swimming pools and capable of producing skin lesions in humans.* Acta Tuberculosea Scandinavica, 1954. **33**, **Suppl**: p. 1-84.

- [348] Lingappa, J.R., et al., *Serogroup W-135 meningococcal disease during the Hajj, 2000*. Emerging Infectious Diseases, 2003. **9**(6): p. 665-71.
- [349] Linnemann, C.C., Jr., et al., *Emergence of acyclovir-resistant varicella zoster virus in an AIDS patient on prolonged acyclovir therapy*. AIDS, 1990. **4**(6): p. 577-579.
- [350] Lisieux, T., et al., *New arenavirus isolated in Brazil*. Lancet, 1994. **343**(8894): p. 391-392.
- [351] Lopman, B.A., et al., *Epidemiology and cost of nosocomial gastroenteritis, Avon, England, 2002-2003*. Emerging Infectious Diseases, 2004. **10**(10): p. 1827-34.
- [352] Lossick, J.G., M. Muller, and T.E. Gorrell, *In vitro drug susceptibility and doses of metronidazole required for cure in cases of refractory vaginal trichomoniasis*. Journal of Infectious Diseases, 1986. **153**(5): p. 948-955.
- [353] Lowy, F.D., *Antimicrobial resistance: the example of Staphylococcus aureus*. J Clin Invest, 2003. **111**(9): p. 1265-73.
- [354] Luft, B.J., et al., *Outbreak of central-nervous-system toxoplasmosis in western Europe and North America*. Lancet, 1983. **1**(8328): p. 781-4.
- [355] Lutwama, J.J., et al., *Isolations of Bwamba virus from south central Uganda and north eastern Tanzania*. African Journal of Health Sciences, 2002. **2**(1): p. 24-28.
- [356] Lvov, D.K., *Omsk hemorrhagic fever*, in *Arboviruses: epidemiology and ecology*, T.P. Monath, Editor. 1988, CRC Press: Boca Raton. p. 205-212.
- [357] Lvov, D.K., et al., *Circulation of viruses of the California serocomplex (Bunyaviridae, Bunyavirus) in the central and southern parts of the Russian plain*. Vopr Virusol, 1998. **43**(1): p. 10-4.
- [358] Lyytikainen, O., et al., *Outbreak of Q fever in Lohra-Rollshausen, Germany, spring 1996*. Eurosurveillance, 1997. **2**: p. 9-11.
- [359] Maberti, S., *The development of resistance to pyrimethamine. Presentation of 15 cases studied in Trujillo, Venezuela*. Archivos Venezolanos de Medicina Tropical y Parasitología Médica, 1960. **3**: p. 239-259.
- [360] Mackenzie, J.S., et al., *Emerging viral diseases of Southeast Asia and the Western Pacific*. Emerging Infectious Diseases, 2001. **7**(3 Suppl): p. 497-504.
- [361] Mackenzie, J.S., et al., *Japanese encephalitis as an emerging virus: the emergence and spread of Japanese encephalitis virus in Australasia*. Current Topics in Microbiology and Immunology, 2002. **267**: p. 49-73.
- [362] MacLean, J.D., et al., *Common-source outbreak of acute infection due to the North American liver fluke *Metorchis conjunctus**. Lancet, 1996. **347**(8995): p. 154-8.
- [363] Madeley, C.R. and B.P. Cosgrove, *Letter: 28 nm particles in faeces in infantile gastroenteritis*. Lancet, 1975. **2**(7932): p. 451-2.
- [364] Maeda, K., et al., *Human infection with Ehrlichia canis, a leukocytic rickettsia*. N Engl J Med, 1987. **316**(14): p. 853-6.
- [365] Maertens, J., et al., *Disseminated infection by Scedosporium prolificans: an emerging fatality among haematology patients. Case report and review*. Annals of Hematology, 2000. **79**(6): p. 340-344.
- [366] Magill, A.J., et al., *Visceral infection caused by Leishmania tropica in veterans of Operation Desert Storm*. N Engl J Med, 1993. **328**(19): p. 1383-7.
- [367] Maitreyi, R.S., et al., *Acute hemorrhagic conjunctivitis due to enterovirus 70 in India*. Emerging Infectious Diseases, 1999. **5**(2): p. 267-9.
- [368] Maiztegui, J.I., *Clinical and epidemiological patterns of Argentine hemorrhagic fever*. Bull World Health Organisation, 1975. **52**(4-6): p. 567-75.
- [369] Maiztegui, J. and M. Sabattini, *Extensión progresiva del area endémica de fiebre hemorrágica argentina*. Medicina (Buenos Aires), 1977. **37**(3): p. 162-166.
- [370] Mall, A.A. and S.B. O'Leary, *Plague in the Americas*. 1945, Washington, D. C.: Pan American Sanitary Bureau.
- [371] Malloch, D. and I.F. Salkin, *A new species of Scedosporium associated with osteomyelitis in humans*. Mycotaxon, 1984. **21**: p. 247-255.
- [372] Marennikova, S.S., et al., *Isolation and properties of the causal agent of a new variola-like disease (monkeypox) in man*. Bull World Health Organisation, 1972. **46**(5): p. 599-611.
- [373] Margileth, A.M., *Cat scratch disease: nonbacterial regional lymphadenitis. The study of 145 patients and a review of the literature*. Pediatrics, 1968. **42**(5): p. 803-18.

- [374] Mariani-Kurkdjian, P., et al., *Identification of a clone of Escherichia coli O103:H2 as a potential agent of hemolytic-uremic syndrome in France*. J Clin Microbiol, 1993. **31**(2): p. 296-301.
- [375] Marks, J. and H. Schwabacher, *Infection Due to Mycobacterium Xenopei*. British Medical Journal, 1965. **5426**: p. 32-33.
- [376] Marlink, R., *Lessons from the second AIDS virus, HIV-2*. AIDS, 1996. **10**(7): p. 689-699.
- [377] Marshall, I.D., *Murray valley and kunjin encephalitis*, in *Arboviruses: epidemiology and ecology*, T.P. Monath, Editor. 1988, CRC Press: Boca Raton. p. 151-186.
- [378] Marshall, W.F., et al., *Xanthomonas maltophilia: an emerging nosocomial pathogen*. Mayo Clin Proc, 1989. **64**(9): p. 1097-104.
- [379] Marshall, M.M., et al., *Waterborne protozoan pathogens*. Clinical Microbiology Reviews, 1997. **10**(1): p. 67-85.
- [380] Martini, G.A., *Marburg agent disease: in man*. Trans R Soc Trop Med Hyg, 1969. **63**(3): p. 295-302.
- [381] Masson, A.M. and F.H. Prissick, *Cervical lymphadenitis in children caused by chromogenic Mycobacteria*. Canadian Medical Association Journal, 1956. **75**(10): p. 798-803.
- [382] Matsumoto, T., et al., *Clinical and mycological spectra of Wangiella dermatitidis infections*. Mycoses, 1993. **36**: p. 145-155.
- [383] Mayo, J., J. Collazos, and E. Martinez, *Mycobacterium nonchromogenicum Bacteremia in an AIDS Patient*. Emerg Infect Dis, 1998. **4**(1): p. 124-125.
- [384] McCarthy, J. and T.A. Moore, *Emerging helminth zoonoses*. Int J Parasitol, 2000. **30**(12-13): p. 1351-60.
- [385] McDonald, J.C., J.D. MacLean, and J.E. McDade, *Imported rickettsial disease: clinical and epidemiologic features*. The American Journal of Medicine, 1988. **85**(6): p. 799-805.
- [386] McManus, D.P., et al., *Echinococcosis*. Lancet, 2003. **362**(9392): p. 1295-304.
- [387] McQuiston, J.H., et al., *The human ehrlichioses in the United States*. Emerging Infectious Diseases, 1999. **5**(5): p. 635-42.
- [388] Medicine, E. *Venezuelan Encephalitis*. [cited 2004 1/21]; Available from: [www.emedicine.com/med/topic3159.htm](http://www.emedicine.com/med/topic3159.htm).
- [389] Mehta, G. and S. Kumari, *Multi-resistant Staphylococcus haemolyticus in a neonatal unit in New Delhi*. Annals of Tropical Paediatrics, 1997. **17**(1): p. 15-20.
- [390] Meingassner, J.G. and J. Thurner, *Strain of Trichomonas vaginalis resistant to metronidazole and other 5-nitroimidazoles*. Antimicrobial Agents and Chemotherapy, 1979. **15**(2): p. 254-257.
- [391] Meisel, J.L., et al., *Overwhelming watery diarrhea associated with a cryptosporidium in an immunosuppressed patient*. Gastroenterology, 1976. **70**(6): p. 1156-1160.
- [392] Merz, W.G., et al., *Increased incidence of fungemia caused by Candida krusei*. J Clin Microbiol, 1986. **24**(4): p. 581-4.
- [393] Meselson, M., et al., *The Sverdlovsk anthrax outbreak of 1979*. Science, 1994. **266**(5188): p. 1202-8.
- [394] Meunier-Carpentier, F., T.E. Kiehn, and D. Armstrong, *Fungemia in the immunocompromised host. Changing patterns, antigenemia, high mortality*. The American Journal of Medicine, 1981. **71**(3): p. 363-370.
- [395] Meyer, K.S., et al., *Nosocomial outbreak of Klebsiella infection resistant to late-generation cephalosporins*. Annals of Internal Medicine, 1993. **119**(5): p. 353-358.
- [396] Mickelsen, P.A., et al., *Clinical and microbiological features of infection with Malassezia pachydermatis in high-risk infants*. Journal of Infectious Diseases, 1988. **157**(6): p. 1163-1168.
- [397] Micozzi, A., et al., *Bacteremia due to Stenotrophomonas maltophilia in patients with hematologic malignancies*. Clinical Infectious Diseases, 2000. **31**(3): p. 705-711.
- [398] Midura, T.F. and S.S. Arnon, *Infant botulism. Identification of Clostridium botulinum and its toxins in faeces*. Lancet, 1976. **2**(7992): p. 934-936.
- [399] Minai, M., Y. Hosaka, and N. Ohta, *Historical view of schistosomiasis japonica in Japan: implementation and evaluation of disease-control strategies in Yamanashi Prefecture*. Parasitol Int, 2003. **52**(4): p. 321-6.

- [400] Minor, P., *Emerging/disappearing viruses future issues concerning polio eradication*. *Virus Res*, 2002. **82**(1-2): p. 33-7.
- [401] Misao, T. and Y. Kobayashi, *Studies on infectious mononucleosis (glandular fever). I. Isolation of etiologic agent from blood, bone marrow and lymph node of a patient with infectious mononucleosis by using mice*. *Kyushu J Med Sci*, 1955. **6**: p. 145-52.
- [402] Mishu, B., et al., *Outbreaks of Salmonella enteritidis infections in the United States, 1985-1991*. *Journal of Infectious Diseases*, 1994. **169**(3): p. 547-552.
- [403] Mitchell, C.J., et al., *Vector and host relationships of California serogroup viruses in western Siberia*. *Am J Trop Med Hyg*, 1993. **49**: p. 53-62.
- [404] Mitsuhashi, S., K. Harada, and H. Hashimoto, *Multiple resistance of enteric bacteria and transmission of drug-resistance to other strain by mixed cultivation*. *Jpn J Exp Med*, 1960. **30**: p. 179-84.
- [405] Mittermayer, T., *Case of glandular form of tularemia acquired during hamster-hunting*. *Ceskoslovenská Epidemiologie, Mikrobiologie, Imunologie*, 1972. **21**(5): p. 263-265.
- [406] Molez, J.F., *The historical question of acquired immunodeficiency syndrome in the 1960s in the Congo River basin area in relation to cryptococcal meningitis*. *The American Journal of Tropical Medicine and Hygiene*, 1998. **58**(3): p. 273-276.
- [407] Monath, T.P., et al., *Hospital epidemic of Lassa fever in Zorzor, Liberia, March-April 1972*. *American Journal of Tropical Medicine and Hygiene*, 1973. **22**: p. 773-779.
- [408] Monath, T.P., et al., *Lassa fever in the Eastern Province of Sierra Leone 1970-1972*. *AJTMH*, 1974. **23**: p. 1140-1149.
- [409] Monath, T.P., *Yellow fever*, in *Arboviruses: epidemiology and ecology*, T.P. Monath, Editor. 1988, CRC Press: Boca Raton. p. 142-218.
- [410] Mone, H., et al., *Ecological and molecular studies on emerging schistosomiasis mansoni in Dhofar Governorate, Sultanate of Oman*. *Trop Med Int Health*, 2003. **8**(3): p. 269-76.
- [411] Moore, M. and J.B. Frerichs, *An unusual acid-fast infection of the knee with subcutaneous, abscess-like lesions of the gluteal region; report of a case with a study of the organism, Mycobacterium abscessus, n. sp.* *J Invest Dermatol*, 1953. **20**(2): p. 133-69.
- [412] Moore, D.V. and J.E. Lanier, *Observations on two Plasmodium falciparum infections with an abnormal response to chloroquine*. *The American Journal of Tropical Medicine and Hygiene*, 1961. **10**: p. 5-9.
- [413] Moore, A. and M. Richer, *Re-emergence of epidemic sleeping sickness in southern Sudan*. *Trop Med Int Health*, 2001. **6**(5): p. 342-7.
- [414] Morabito, S., et al., *Enterohemorrhagic, Shiga toxin-producing Escherichia coli O111:H2 associated with an outbreak of hemolytic-uremic syndrome*. *J Clin Microbiol*, 1998. **36**(3): p. 840-2.
- [415] Morris, J.G., Jr., et al., *Illness caused by Vibrio damsela and Vibrio hollisae*. *Lancet*, 1982. **1**(8284): p. 1294-7.
- [416] Morse, S.S., *Factors in the emergence of infectious diseases*. *Emerging Infectious Diseases*, 1995. **1**(1): p. 7-15.
- [417] Moss, A.R., et al., *Risk factors for AIDS and HIV seropositivity in homosexual men*. *Am J Epidemiol*, 1987. **125**: p. 1035-1047.
- [418] Muhammad, N., M.D. Mahmood, and M.E. Keohane, *Pathologic Quiz Case: A 45-Year-Old Renal Transplant Recipient With Persistent Fever*. *Archives of Pathology and Laboratory Medicine*. **127**(4): p. 224-226.
- [419] Mullins, J.A., et al., *Emergence of echovirus type 13 as a prominent enterovirus*. *Clinical Infectious Diseases*, 2004. **38**(1): p. 70-77.
- [420] Munshi, M.H., et al., *Plasmid-mediated resistance to nalidixic acid in Shigella dysenteriae type 1*. *Lancet*, 1987. **2**(8556): p. 419-421.
- [421] Murphy, N., et al., *Infection and colonisation of neonates by Hansenula anomala*. *Lancet*, 1986. **1**(8476): p. 291-293.
- [422] Murphy, P.G. and W.P. Ferguson, *Corynebacterium jeikeium (group JK) resistance to ciprofloxacin emerging during therapy*. *J Antimicrob Chemother*, 1987. **20**(6): p. 922-3.
- [423] Murray, B.E., *The life and times of the Enterococcus*. *Clinical Microbiology Reviews*, 1990. **3**(1): p. 46-65.



- [424] Murray, K., et al., *A novel morbillivirus pneumonia of horses and its transmission to humans*. Emerging Infectious Diseases, 1995. **1**(1): p. 31-3.
- [425] Murray, B.E., *Vancomycin-resistant enterococcal infections*. N Engl J Med, 2000. **342**(10): p. 710-21.
- [426] Murrell, K.D. and E. Pozio, *Trichinellosis: the zoonosis that won't go quietly*. Int J Parasitol, 2000. **30**(12-13): p. 1339-49.
- [427] Nachamkin, I., H. Ung, and M. Li, *Increasing fluoroquinolone resistance in Campylobacter jejuni, Pennsylvania, USA, 1982-2001*. Emerging Infectious Diseases, 2002. **8**(12): p. 1501-3.
- [428] Neiva, A., Mem Inst Oswaldo Cruz, 1910. **2**: p. 131-140.
- [429] Nelson, D.E., et al., *Epidemic Clostridium difficile-associated diarrhea: role of second- and third-generation cephalosporins*. Infect Control Hosp Epidemiol, 1994. **15**(2): p. 88-94.
- [430] Ng, V.L., et al., *Successive bacteremias with "Campylobacter cinaedi" and "Campylobacter fennelliae" in a bisexual male*. J Clin Microbiol, 1987. **25**(10): p. 2008-9.
- [431] Ng, V.L., et al., *Successive bacteremias with campylobacter-cinaedi and campylobacter-fennelliae in a bisexual male*. Journal of Clinical Microbiology, 1987. **25**(10): p. 2008-2009.
- [432] Niklasson, B. and S. Vene, *Vector-borne viral diseases in Sweden--a short review*. Archives of Virology, 1996. **11**: p. 49-55.
- [433] Nilehn, B., *Studies on Yersinia enterocolitica with special reference to bacterial diagnosis and occurrence in human acute enteric disease*. Acta Pathologica et Microbiologica Scandinavica, 1969. **206**, **Suppl**: p. 5.
- [434] Nilsson, K., O. Lindquist, and C. Pahlson, *Association of Rickettsia helvetica with chronic perimyocarditis in suden cardiac death*. Lancet, 1999. **354**: p. 1169-1173.
- [435] Nime, F.A., et al., *Acute enterocolitis in a human being infected with the protozoan Cryptosporidium*. Gastroenterology, 1976. **70**(4): p. 592-598.
- [436] Nocht, B. and H. Werner, Deutsche Medizinische Wochenschrift, 1910. **36**: p. 1557-1560.
- [437] Nosten, F., et al., *Mefloquine-resistant falciparum malaria on the Thai-Burmese border*. Lancet, 1991. **337**(8750): p. 1140-3.
- [438] O'Carroll, M.R., et al., *Burkholderia pseudomallei: another emerging pathogen in cystic fibrosis*. Thorax, 2003. **58**(12): p. 1087-91.
- [439] Olson, J.G., et al., *Zika virus, a cause of fever in Central Java, Indonesia*. Trans R Soc Trop Med Hyg, 1981. **75**(3): p. 389-93.
- [440] Ong, C.T., et al., *Emerging Pseudomonas aeruginosa resistance: implications in clinical practice*. Connecticut Medicine, 2004. **68**(1): p. 11-15.
- [441] Orenstein, J.M., D.T. Dieterich, and D.P. Kotler, *Systemic dissemination by a newly recognized intestinal microsporidia species in AIDS*. AIDS, 1992. **6**(10): p. 1143-1150.
- [442] Orenstein, J.M., et al., *A microsporidian previously undescribed in humans, infecting enterocytes and macrophages, and associated with diarrhea in an acquired immunodeficiency syndrome patient*. Hum Pathol, 1992. **23**(7): p. 722-8.
- [443] Orskov, F., *On the occurrence of E. coli belonging to O-group 26 in cases of infantile diarrhoea and white scours*. Acta Pathologica et Microbiologica Scandinavica, 1951. **29**(4): p. 373-378.
- [444] Osano, E., et al., *Molecular characterization of an enterobacterial metallo beta-lactamase found in a clinical isolate of Serratia marcescens that shows imipenem resistance*. Antimicrobial Agents and Chemotherapy, 1994. **38**(1): p. 71-78.
- [445] Osman, H.K., et al., *"Cytomegalovirus disease" in renal allograft recipients: is human herpesvirus 7 a co-factor for disease progression?* J Med Virol, 1996. **48**(4): p. 295-301.
- [446] O'Sullivan, J.D., et al., *Fatal encephalitis due to novel paramyxovirus transmitted from horses*. Lancet, 1997. **349**(9045): p. 93-5.
- [447] Pahwa, S., et al., *Continuous varicella-zoster infection associated with acyclovir resistance in a child with AIDS*. Journal of the American Medical Association, 1988. **260**(19): p. 2879-2882.
- [448] Pai, C.H., et al., *Epidemiology of sporadic diarrhea due to verocytotoxin-producing Escherichia coli: a two-year prospective study*. Journal of Infectious Diseases, 1988. **157**(5): p. 1054-1057.



- [449] Panwalker, A.P. and E. Fuhse, *Nosocomial Mycobacterium gordonae* pseudoinfection from contaminated ice machines. *Infect Control*, 1986. **7**(2): p. 67-70.
- [450] Pappagianis, D., *Marked increase in cases of coccidioidomycosis in California: 1991, 1992, and 1993*. *Clinical Infectious Diseases*, 1994. **19**: p. S14-18.
- [451] Parkhill, J., et al., *Complete genome sequence of a multiple drug resistant Salmonella enterica serovar Typhi CT18*. *Nature*, 2001. **413**(6858): p. 848-52.
- [452] Parodi, A.S., et al., *Concerning the epidemic outbreak in Junin*. *El Día Médico*, 1958. **30**(62): p. 2300-2301.
- [453] Parola, P. and D. Raoult, *Molecular tools in the epidemiology of tick-borne bacterial diseases*. *Annales de Biologie Clinique (Paris)*, 2001. **59**(2): p. 177-182.
- [454] Parola, P., et al., *Emerging rickettsioses of the Thai-Myanmar border*. *Emerging Infectious Diseases*, 2003. **9**(5): p. 592-5.
- [455] Parry, M.F., K.B. Panzer, and M.E. Yukna, *Quinolone resistance. Susceptibility data from a 300-bed community hospital*. *The American Journal of Medicine*, 1989. **87**(5A): p. 12S-16S.
- [456] Parry, C., et al., *Quinolone-resistant Salmonella typhi in Vietnam*. *Lancet*, 1998. **351**(9111): p. 1289.
- [457] Pascual, J.E., R.P. Bouli, and H. Aguiar, *Eosinophilic meningoencephalitis in Cuba, caused by Angiostrongylus cantonensis*. *The American Journal of Tropical Medicine and Hygiene*, 1981. **30**(5): p. 960-962.
- [458] Pasternak, J., et al., *Bacteremia caused by Campylobacter-like organisms in two male homosexuals*. *Annals of Internal Medicine*, 1984. **101**(3): p. 339-341.
- [459] Paton, R., et al., *ARI-1: -lactamase-mediated imipenem resistance in Acinetobacter baumannii*. *Int J Antimicrob Agents*, 1993. **2**: p. 81-88.
- [460] Patz, J.A., et al., *Effects of environmental change on emerging parasitic diseases*. *Int J Parasitol*, 2000. **30**(12-13): p. 1395-405.
- [461] Paull, A., *An environmental study of the opportunist mycobacteria*. *Med Lab Technol*, 1973. **30**(1): p. 11-19.
- [462] Peixoto, J.C., et al., *Genetic differences between Escherichia coli O26 strains isolated in Brazil and in other countries*. *FEMS Microbiol Lett*, 2001. **196**(2): p. 239-44.
- [463] Pereira, H.G., et al., *Novel viruses in human faeces*. *Lancet*, 1988. **2**(8602): p. 103-4.
- [464] Peters, C.J., et al., *Hemorrhagic fever in Cochabamba, Bolivia, 1971*. *American Journal of Epidemiology*, 1974. **99**(6): p. 425-433.
- [465] Peters, C.J., et al., *Filoviridae: Marburg and Ebola viruses*, in *Fields Virology*, B.N. Fields, et al., Editors. 1996, Lippincott Williams & Wilkins: New York. p. 2950.
- [466] Peters, C.J. and J.W. LeDuc, *An introduction to Ebola: the virus and the disease*. *Journal of Infectious Diseases*, 1999. **179**, **Supp 1**: p. ix-xvi.
- [467] Petersen, L.R., et al., *Developing national epidemiologic capacity to meet the challenges of emerging infections in Germany*. *Emerging Infectious Diseases*, 2000. **6**(6): p. 576-84.
- [468] Philbey, A.W., et al., *An apparently new virus (family Paramyxoviridae) infectious for pigs, humans, and fruit bats*. *Emerging Infectious Diseases*, 1998. **4**(2): p. 269-71.
- [469] Philip, C.B., *Tsutsugamushi disease (scrub typhus) in WW2*. *J Parasitol*, 1948. **34**: p. 169-91.
- [470] Phillips, R.S., *Current status of malaria and potential for control*. *Clinical Microbiology Reviews*, 2001. **14**(1): p. 208-226.
- [471] Piddock, L.J., *Does the use of antimicrobial agents in veterinary medicine and animal husbandry select antibiotic-resistant bacteria that infect man and compromise antimicrobial chemotherapy?* *J Antimicrob Chemother*, 1996. **38**(1): p. 1-3.
- [472] Piersimoni, C., E. Tortoli, and G. De Sio, *Disseminated infection due to Mycobacterium celatum in patient with AIDS*. *Lancet*, 1994. **344**(8918): p. 332.
- [473] Pitchenik, A.E., et al., *Opportunistic infections and Kaposi's sarcoma among Haitians: evidence of a new acquired immunodeficiency state*. *Annals of Internal Medicine*, 1983. **98**(3): p. 277-284.
- [474] Poiesz, B.J., et al., *Detection and isolation of type C retrovirus particles from fresh and cultured lymphocytes of a patient with cutaneous T-cell lymphoma*. *Proc Natl Acad Sci U S A*, 1980. **77**(12): p. 7415-9.

- [475] Potel, J., *Granulomatosis infantiseptica*. Zentralbl Bakteriell Parasitenkd Infektionskr Hyg, 1952. **158**(3-5): p. 329-32.
- [476] Pottumarthy, S., et al., *Nocardia veterana*, a new emerging pathogen. J Clin Microbiol, 2003. **41**(4): p. 1705-9.
- [477] Powers, A.M., et al., *Re-emergence of Chikungunya and O'nyong-nyong viruses: evidence for distinct geographical lineages and distant evolutionary relationships*. J Gen Virol, 2000. **81**(Pt 2): p. 471-9.
- [478] Pozio, E., A. Tamburrini, and G. La Rosa, *Horse trichinellosis, an unresolved puzzle*. Parasite, 2001. **8**(2 Suppl): p. S263-5.
- [479] Pozio, E., *New patterns of Trichinella infection*. Vet Parasitol, 2001. **98**(1-3): p. 133-48.
- [480] Pretorius, A.M., et al., *Are Bartonella emerging and re-emerging pathogens in southern Africa?* S Afr Med J, 2000. **90**(6): p. 566.
- [481] Prissick, F.H. and A.M. Masson, *Yellow-pigmented pathogenic mycobacteria from cervical lymphadenitis*. Canadian Journal of Microbiology, 1957. **3**(1): p. 91-100.
- [482] Queenan, A.M., et al., *SME-type carbapenem-hydrolyzing class A beta-lactamases from geographically diverse Serratia marcescens strains*. Antimicrobial Agents and Chemotherapy, 2000. **44**(11): p. 3035-3039.
- [483] Quick, R.E., et al., *Babesiosis in Washington State: a new species of Babesia?* Annals of Internal Medicine, 1993. **119**(4): p. 284-290.
- [484] Quinn, J.P., *Imipenem resistance among gram-negative bacilli*. Eur J Clin Microbiol Infect Dis, 1994. **13**(3): p. 203-204.
- [485] Raad, I., A. Alrahan, and K. Rolston, *Staphylococcus epidermidis: emerging resistance and need for alternative agents*. Clinical Infectious Diseases, 1998. **26**(5): p. 1182-1187.
- [486] Rabsch, W., H. Tschape, and A.J. Baumler, *Non-typhoidal salmonellosis: emerging problems*. Microbes Infect, 2001. **3**(3): p. 237-47.
- [487] Raccurt, C.P., J. Blaise, and M.C. Durette-Desset, *Presence of Angiostrongylus cantonensis in Haiti*. Trop Med Int Health, 2003. **8**(5): p. 423-6.
- [488] Rajagopalan, P.K., et al., *Environmental and water management for mosquito control, in Appropriate technology in vector control*, C.F. Curtis, Editor. 1990, CRC Press: Boca Raton, FL. p. 121-138.
- [489] Rall, G.F., *Measles virus 1998-2002: progress and controversy*. Annual Review of Microbiology, 2003. **57**: p. 343-367.
- [490] Ralston, M., *Neurocysticercosis: an exotic disease presenting in Australian immigrants*. Med J Aust, 1978. **2**(11): p. 535-6.
- [491] Ramalingaswami, V., *The plague outbreaks of India, 1994—a prologue*. Current Science, 1996. **71**: p. 781-806.
- [492] Rammelkamp, C.H. and T. Maxon, *Resistance of Staphylococcus aureus to the action of penicillin*. Proc Royal Soc Exper Biol Med, 1942. **51**: p. 386-9.
- [493] Rampling, A., et al., *Salmonella enteritidis phage type 4 infection of broiler chickens: a hazard to public health*. Lancet, 1989. **2**(8660): p. 436-8.
- [494] Randall, R. and J.W. Mills, *Fatal encephalitis in Man due to Venezuelan Virus of Equine Encephalomyelitis in Trinidad*. Science, 1944. **99**: p. 225-6.
- [495] Raoult, D., P. Brouqui, and V. Roux, *A new spotted-fever-group rickettsiosis*. Lancet, 1996. **348**(9024): p. 412.
- [496] Raoult, D., et al., *A new tick-transmitted disease due to Rickettsia slovaca*. Lancet, 1997. **350**(9071): p. 112-3.
- [497] Raoult, D., et al., *Jail fever (epidemic typhus) outbreak in Burundi*. Emerging Infectious Diseases, 1997. **3**(3): p. 357-60.
- [498] Raoult, D., et al., *Outbreak of epidemic typhus associated with trench fever in Burundi*. Lancet, 1998. **352**(9125): p. 353-8.
- [499] Raoult, D., et al., *A flea-associated Rickettsia pathogenic for humans*. Emerging Infectious Diseases, 2001. **7**(1): p. 73-81.
- [500] Rapmund, G., *Rickettsial diseases of the Far East: new perspectives*. Journal of Infectious Diseases, 1984. **149**(3): p. 330-338.

- [501] Rasoamanana, B., et al., *Surveillance de la sensibilité aux antibiotiques des souches de Yersinia pestis à Madagascar de 1989 à 1995*. Arch Inst Pasteur Madagascar, 1995. **62**: p. 108-110.
- [502] Raviglione, M.C., et al., *Ciprofloxacin-resistant methicillin-resistant staphylococcus-aureus in an acute care hospital*. Antimicrobial Agents and Chemotherapy 1990. **34**: p. 2050-2054.
- [503] Reacher, M., et al., *Nontoxigenic corynebacterium diphtheriae: an emerging pathogen in England and Wales?* Emerging Infectious Diseases, 2000. **6**(6): p. 640-5.
- [504] Redline, R.W. and B.B. Dahms, *Malassezia pulmonary vasculitis in an infant on long-term Intralipid therapy*. N Engl J Med, 1981. **305**(23): p. 1395-8.
- [505] Relman, D.A., *Has trench fever returned?* N Engl J Med, 1995. **332**(7): p. 463-4.
- [506] Renton, A.M., et al., *Epidemics of syphilis in the newly independent states of the former Soviet Union*. Sex Transm Infect, 1998. **74**(3): p. 165-6.
- [507] Richter, J., et al., *Rickettsia felis infection acquired in Europe and documented by polymerase chain reaction*. Emerg Infect Dis, 2002. **8**: p. 207-208.
- [508] Rideout, B.A., et al., *Fatal infections with Balamuthia mandrillaris (a free-living amoeba) in gorillas and other Old World primates*. Vet Pathol, 1997. **34**(1): p. 15-22.
- [509] Rieckmann, K.H., D.R. Davis, and D.C. Hutton, *Plasmodium vivax resistance to chloroquine?* Lancet, 1989. **2**(8673): p. 1183-4.
- [510] Riepenhoff-Talty, M., et al., *Epidemiology of group C rotavirus infection in Western New York women of childbearing age*. J Clin Microbiol, 1997. **35**(2): p. 486-8.
- [511] Riley, L.W., et al., *Hemorrhagic colitis associated with a rare Escherichia coli serotype*. N Engl J Med, 1983. **308**(12): p. 681-5.
- [512] Riley, T.V., et al., *Outbreak of gentamicin-resistant Acinetobacter baumannii in an intensive care unit: clinical, epidemiological and microbiological features*. Pathology, 1996. **28**(4): p. 359-63.
- [513] Rivas, M., et al., *Cholera isolates in relation to the "eighth pandemic"*. Lancet, 1993. **342**(8876): p. 926-7.
- [514] Robertson, R.G. and C.L. Wisseman, Jr., *Tick-borne rickettsiae of the spotted fever group in West Pakistan. II. Serological classification of isolates from West Pakistan and Thailand: evidence for two new species*. American Journal of Epidemiology, 1973. **97**(1): p. 55-64.
- [515] Rodger, S.M., R.F. Bishop, and I.H. Holmes, *Detection of a rotavirus-like agent associated with diarrhea in an infant*. J Clin Microbiol, 1982. **16**(4): p. 724-6.
- [516] Rodrigue, D.C., R.V. Tauxe, and B. Rowe, *International increase in Salmonella enteritidis: a new pandemic?* Epidemiol Infect, 1990. **105**(1): p. 21-7.
- [517] Rogerie, F., et al., *Comparison of norfloxacin and nalidixic acid for treatment of dysentery caused by Shigella dysenteriae type 1 in adults*. Antimicrobial Agents and Chemotherapy, 1986. **29**(5): p. 883-886.
- [518] Rolain, J.M., et al., *Molecular detection of pathogenic Bartonella and Rickettsia in cat fleas from France*. Emerg Infect Dis, 2003. **9**: p. 338-342.
- [519] Rosa, A.P., et al., *Outbreak of oropouche virus fever in Serra Pelada, municipality of Curionópolis, Para, 1994*. Rev Soc Bras Med Trop, 1996. **29**(6): p. 537-41.
- [520] Rowe, B., L.R. Ward, and E.J. Threlfall, *Treatment of multiresistant typhoid fever*. Lancet, 1991. **337**(8754): p. 1422.
- [521] Rowe, B., L.R. Ward, and E.J. Threlfall, *Ciprofloxacin-resistant Salmonella typhi in the UK*. Lancet, 1995. **346**(8985): p. 1302.
- [522] Ruitter, M. and H.M. Wentholt, *The occurrence of a pleuropneumonia-like organism in fusospirillary infections of the human genital mucosa*. J Invest Dermatol, 1952. **18**(4): p. 313-25.
- [523] Russmann, H., et al., *Genotyping of Shiga-like toxin genes in non-O157 Escherichia coli strains associated with haemolytic uraemic syndrome*. J Med Microbiol, 1995. **42**(6): p. 404-10.
- [524] Sabath, L.D., et al., *Methicillin resistance of Staphylococcus aureus and Staphylococcus epidermidis*. Antimicrobial Agents and Chemotherapy, 1968. **8**: p. 302-306.
- [525] Sabin, A.B., *Phlebotomous, a disease of military importance*. J Am Med Assoc, 1944. **125**: p. 603-606.

- [526] Saez-Nieto, J.A., et al., *Isolation of Neisseria meningitidis strains with increase of penicillin minimal inhibitory concentrations*. *Epidemiol Infect*, 1987. **99**(2): p. 463-9.
- [527] Saha, S.K., et al., *A highly ceftriaxone-resistant Salmonella typhi in Bangladesh*. *Pediatr Infect Dis J*, 1999. **18**(4): p. 387.
- [528] Salahuddin, S.Z., et al., *Isolation of a new virus, HBLV, in patients with lymphoproliferative disorders*. *Science*, 1986. **234**(4776): p. 596-601.
- [529] Salas, R., et al., *Venezuelan haemorrhagic fever*. *Lancet*, 1991. **338**(8774): p. 1033-1036.
- [530] Salkin, I.F., et al., *Scedosporium inflatum, an emerging pathogen*. *J Clin Microbiol*, 1988. **26**(3): p. 498-503.
- [531] Saluzzo, J.F., *Factors in the emergence of arboviruses*, in *Emerging Infections*, W.M. Scheld, W.A. Craig, and J.M. Hughes, Editors. 1997, ASM Press: Washington, D. C.
- [532] Sanogo, Y.O., et al., *Prevalence of Rickettsia spp. in Dermacentor marginatus ticks removed from game pigs (Sus scrofa) in southern France*. *Annals of the New York Academy of Sciences*, 2003. **990**: p. 191-195.
- [533] Sanyal, S.C. and E.M. Mokaddas, *The increase in carbapenem use and emergence of Stenotrophomonas maltophilia as an important nosocomial pathogen*. *J Chemother*, 1999. **11**(1): p. 28-33.
- [534] Scheld, W.M. and J.M. Hughes, eds. *Emerging infections 1*. 1997, ASM Press: Washington, D.C.
- [535] Scheld, W.M., P.S. Craig, and J.M. Hughes, eds. *Emerging Infections 3*. 1999, ASM Press: Washington, D.C. 266.
- [536] Scheld, W.M., J.M. Hughes, and P.S. Craig, eds. *Emerging Infections 4*. 2000, ASM Press: Washington, D.C. 266.
- [537] Schlech, W.F., 3rd, et al., *Epidemic listeriosis--evidence for transmission by food*. *N Engl J Med*, 1983. **308**(4): p. 203-6.
- [538] Schmidt, N.J., E.H. Lennette, and H.H. Ho, *An apparently new enterovirus isolated from patients with disease of the central nervous system*. *Journal of Infectious Diseases*, 1974. **129**(3): p. 304-309.
- [539] Schmunis, G.A. and S.J. Corber, *Tourism and Emerging and Re-emerging Infectious Diseases in the Americas: What Physicians Must Remember for Patient Diagnosis and Care*. *The Brazilian Journal of Infectious Diseases*, 1999. **3**(2): p. 31-49.
- [540] Schottelius, J. and S.C. da Costa, *Microsporidia and acquired immunodeficiency syndrome*. *Mem Inst Oswaldo Cruz*, 2000. **95 Suppl 1**: p. 133-9.
- [541] Schriefer, M.E., et al., *Identification of a novel rickettsial infection in a patient diagnosed with murine typhus*. *J Clin Microbiol*, 1994. **32**(4): p. 949-54.
- [542] Schroder, K.H. and I. Juhlin, *Mycobacterium malmoense sp. nov.* *Int J Syst Bacteriol*, 1977. **27**: p. 241-6.
- [543] Schuh, V. and E. Aldova, *Multiple drug resistane Shigellae*. *Zentralbl Bakteriol Mikrobiol Hyg [A]*, 1966. **200**(4): p. 460-467.
- [544] Schwalbe, R.S., J.T. Stapleton, and P.H. Gilligan, *Emergence of vancomycin resistance in coagulase-negative staphylococci*. *N Engl J Med*, 1987. **316**(15): p. 927-31.
- [545] Schwarz, T.F., *Imported vector- and rodent-borne virus infections – an introduction*. *Archives of Virology Supplement*, 1996. **11** p. 3-11.
- [546] Schwarz, T.F., et al., *Travel-related vector-borne virus infections in Germany*. *Archives of Virology Supplement*, 1996. **11**: p. 57-65.
- [547] Sciotto, E., et al., *Taenia solium disease in humans and pigs: an ancient parasitosis disease rooted in developing countries and emerging as a major health problem of global dimensions*. *Microbes Infect*, 2000. **2**(15): p. 1875-90.
- [548] Scotland, S.M., et al., *Vero cytotoxin-producing strains of Escherichia coli from children with haemolytic uraemic syndrome and their detection by specific DNA probes*. *J Med Microbiol*, 1988. **25**(4): p. 237-43.
- [549] Serbezov, V.S., et al., *Q fever in Bulgaria and Slovakia*. *Emerging Infectious Diseases*, 1999. **5**(3): p. 388-94.
- [550] Sermet-Gaudelus, I., et al., *Mycobacterium abscessus and children with cystic fibrosis*. *Emerging Infectious Diseases*, 2003. **9**(12): p. 1587-91.



- [551] Shah, P.M. and W. Stille, *Escherichia coli* and *Klebsiella pneumoniae* strains more susceptible to cefoxitin than to third generation cephalosporins. *J Antimicrob Chemother*, 1983. **11**(6): p. 597-8.
- [552] Shandera, W.X., et al., *Disease from infection with *Vibrio mimicus*, a newly recognized *Vibrio* species. Clinical characteristics and epidemiology*. *Annals of Internal Medicine*, 1983. **99**(2): p. 169-171.
- [553] Shanson, D.C., J.C. Kensit, and R. Duke, *Outbreak of hospital infection with a strain of *Staphylococcus aureus* resistant to gentamicin and methicillin*. *Lancet*, 1976. **2**(7999): p. 1347-8.
- [554] Sharma, V.P., *Re-emergence of malaria in India*. *Indian J Med Res*, 1996. **103**: p. 26-45.
- [555] Shaw, J.J., R. Lainson, and H. Fraiha, *Considerações sobre a epidemiologia dos primeiros casos autóctones de doença de Chagas registrados em Belém, Pará, Brasil*. *Rev Bras Saúde Pública, São Paulo*, 1969. **3**: p. 153-7.
- [556] Sheng, W.H., et al., *Emerging fluoroquinolone-resistance for common clinically important gram-negative bacteria in Taiwan*. *Diagnostic Microbiology and Infectious Disease*, 2002. **43**(2): p. 141-147.
- [557] Shi, D., *Epidemiology and transmission of cystic echinococcosis: China*. *Arch Int Hidatidosis*, 1997. **32**: p. 50-54.
- [558] Shimshony, A., *Epidemiology of emerging zoonoses in Israel*. *Emerging Infectious Diseases*, 1997. **3**(2): p. 229-38.
- [559] Shirako, Y., et al., *Structure of the Ockelbo virus genome and its relationship to other Sindbis viruses*. *Virology*, 1991. **182**(2): p. 753-64.
- [560] Shirasaka, T., et al., *Emergence of human immunodeficiency virus type 1 variants with resistance to multiple dideoxynucleosides in patients receiving therapy with dideoxynucleosides*. *Proc Natl Acad Sci U S A*, 1995. **92**(6): p. 2398-402.
- [561] Shoji, H., et al., *Acute viral encephalitis: the recent progress*. *Intern Med*, 2002. **41**(6): p. 420-8.
- [562] Shope, R.E., J.P. Woodhall, and A.T. Da Rosa, *The epidemiology of diseases caused by viruses in group C and Guama (*Bunyaviridae*)*, in *Arboviruses: epidemiology and ecology*, T.P. Monath, Editor. 1988, CRC Press: Boca Raton. p. 37-51.
- [563] Shubladze, A.K., G. Sla, and V.I. Gavrillov, *Virological studies on laboratory cases of Venezuelan equine encephalomyelitis*. *Vopr Virusol*, 1959. **4**(3): p. 305-10.
- [564] Sibrack, C.D., et al., *Pathogenicity of acyclovir-resistant herpes simplex virus type 1 from an immunodeficient child*. *Journal of Infectious Diseases*, 1982. **146**(5): p. 673-682.
- [565] Simasathien, S., C. Duangmani, and P. Echeverria, *Haemophilus influenzae type B resistant to ampicillin and chloramphenicol in an orphanage in Thailand*. *Lancet*, 1980. **2**(8206): p. 1214-7.
- [566] Simondon, F. and N. Guiso, *International epidemiology of whooping cough*. *Medecine et Maladies Infectieuses*, 2001. **31**: p. 5S-11S.
- [567] Simons, J.N., et al., *Isolation of novel virus-like sequences associated with human hepatitis*. *Nat Med*, 1995. **1**(6): p. 564-9.
- [568] Sirisanthana, T., et al., *First cases of Spotted Fever Group rickettsiosis in Thailand*. *American Journal of Tropical Medicine and Hygiene*, 1994. **50**: p. 682-686.
- [569] Skogh, M. and A. Espmark, *Ockelbo disease: epidemic arthritis-exanthema syndrome in Sweden caused by Sindbis-virus like agent*. *Lancet*, 1982. **1**(8275): p. 795-6.
- [570] Skrabalo, Z. and Z. Deanovic, *Piroplasmiasis in man; report of a case*. *Doc Med Geogr Trop*, 1957. **9**(1): p. 11-6.
- [571] Slater, L.N., et al., *A newly recognized fastidious gram-negative pathogen as a cause of fever and bacteremia*. *N Engl J Med*, 1990. **323**(23): p. 1587-93.
- [572] Slepishkin, A.N., *Epidemiological studies on case of Venezuelan equine encephalomyelitis in a laboratory*. *Vopr Virusol*, 1959. **4**(3): p. 311-4.
- [573] Slutsker, L., S.F. Altekruze, and D.L. Swerdlow, *Foodborne diseases. Emerging pathogens and trends*. *Infect Dis Clin North Am*, 1998. **12**(1): p. 199-216.
- [574] Smith, K.O., *Some biologic aspects of herpesvirus-cell interactions in the presence of 5-iodo,2-deoxyuridine (IDU)*. *J Immunol*, 1963. **91**: p. 582-590.



- [575] Smith, C.E., *Human and animal ecological concepts behind the distribution, behaviour and control of yellow fever*. Bulletin de la Société de Pathologie Exotique et de ses Filiales, 1971. **64**(5): p. 683-694.
- [576] Smith, D., et al., *Fluconazole resistant candida in AIDS*. J Infect, 1991. **23**(3): p. 345-346.
- [577] Smith, K.R. and C.G. Cobbs, *In vitro activity of sparfloracin and three other fluoroquinolones against methicillin-resistant Staphylococcus aureus and Staphylococcus epidermidis*. Eur J Clin Microbiol Infect Dis, 1992. **11**(1): p. 55-8.
- [578] Smith, D.H., J. Pepin, and A.H. Stich, *Human African trypanosomiasis: an emerging public health crisis*. British Medical Bulletin, 1998. **54**(2): p. 341-355.
- [579] Smolinski, M.S., M.A. Hamburg, and J. Lederberg, eds. *Microbial Threats to Human Health: Emergence, Detection and Response*. 2003, National Academies Press: Washington, D.C. 398.
- [580] Sobel, J.D., V. Nagappan, and P. Nyirjesy, *Metronidazole-resistant vaginal trichomoniasis--an emerging problem*. N Engl J Med, 1999. **341**(4): p. 292-3.
- [581] Solnick, J.V. and D.B. Schauer, *Emergence of Diverse Helicobacter Species in the Pathogenesis of Gastric and Enterohepatic Diseases* Clinical Microbiology Reviews, 2001. **14**: p. 59-97.
- [582] Solomon, T. and M. Mallewa, *Dengue and other emerging flaviviruses*. J Infect, 2001. **42**(2): p. 104-115.
- [583] Somani, J., et al., *Multiple drug-resistant Chlamydia trachomatis associated with clinical treatment failure*. Journal of Infectious Diseases, 2000. **181**(4): p. 1421-1427.
- [584] Sompolinsky, D., et al., *Mycobacterium haemophilum sp. nov., a new pathogen of humans*. Int J Syst Bacteriol, 1978. **28**: p. 67-75.
- [585] Sorvillo, F., et al., *Trichomonas vaginalis, HIV, and African-Americans*. Emerging Infectious Diseases, 2001. **7**(6): p. 927-32.
- [586] Spencer, J.D., et al., *Murray Valley encephalitis virus surveillance and control initiatives in Australia*. National Arbovirus Advisory Committee of the Communicable Diseases Network Australia. Communicable Diseases Intelligence, 2001. **25**(2): p. 33-47.
- [587] Spera, R.V., Jr. and B.F. Farber, *Multiple-resistant Enterococcus faecium. The nosocomial pathogen of the 1990s*. Journal of the American Medical Association, 1992. **268**(18): p. 2563-2564.
- [588] Springer, B., et al., *Mycobacterium conspicuum sp. nov., a new species isolated from patients with disseminated infections*. J Clin Microbiol, 1995. **33**(11): p. 2805-11.
- [589] Stanford, J.L., et al., *Studies on Mycobacterium chelonae*. J Med Microbiol, 1971. **5**: p. 177-182.
- [590] Steere, A.C., et al., *Historical perspective of Lyme disease*. Zentralbl Bakteriell Mikrobiol Hyg [A], 1986. **263**(1-2): p. 3-6.
- [591] Steere, A.C., et al., *Clinical manifestations of Lyme disease*. Zentralbl Bakteriell Mikrobiol Hyg [A], 1986. **263**(1-2): p. 201-5.
- [592] Stefan, A., L. Menotti, and G. Campadelli-Fiume, *Two emerging pathogens: human herpesviruses 6 and 7*. Herpes, 1999. **6**(3): p. 78-81.
- [593] Stefani, S. and P.E. Varaldo, *Epidemiology of methicillin-resistant staphylococci in Europe*. Clinical Microbiology and Infection, 2003. **9**(12): p. 1179-1186.
- [594] Steinert, M., K. Heuner, and J. Hacker, *Legionellosis, a Disease Transmitted by Technical Vectors*, in *Emerging Bacterial Pathogens*, I. Muhldorfer and K.P. Schafer, Editors. 2001, Karger: Basel. p. 12-19.
- [595] Stenos, J., et al., *Rickettsia honei sp. nov., the aetiological agent of Flinders Island spotted fever in Australia*. Int J Syst Bacteriol, 1998. **48 Pt 4**: p. 1399-404.
- [596] Stewart, S.J., *Tularemia: association with hunting and farming*. FEMS Immunol Med Microbiol, 1996. **13**(3): p. 197-99.
- [597] Stijns, J. and P. Royer, *A case of Torulopsis meningitis in the Belgian Congo*. Annales de la Société Belge de Médecine Tropicale, 1953. **33**(5): p. 483-486.
- [598] Stroffolini, T., P. Pasquini, and A. Mele, *HBsAg carriers among pregnant women in Italy: results from the screening during a vaccination campaign against hepatitis B*. Public Health, 1988. **102**(4): p. 329-33.

- [599] Subbarao, K., et al., *Characterization of an avian influenza A (H5N1) virus isolated from a child with a fatal respiratory illness*. *Science*, 1998. **279**(5349): p. 393-6.
- [600] Subekti, D., et al., *Shigella spp. surveillance in Indonesia: the emergence or reemergence of S. dysenteriae*. *Emerging Infectious Diseases*, 2001. **7**(1): p. 137-40.
- [601] Sun, L., et al., *The emergence of a highly transmissible lineage of cbl+ Pseudomonas (Burkholderia) cepacia causing CF centre epidemics in North America and Britain*. *Nat Med*, 1995. **1**: p. 661-666.
- [602] Takao, S., et al., *The first reported case of Japanese spotted fever in Hiroshima Prefecture, Japan*. *Jpn J Infect Dis*, 2000. **53**(5): p. 216-7.
- [603] Takashima, I., et al., *Epidemiology of tick-borne encephalitis (TBE) and phylogenetic analysis of TBE viruses in Japan and Far Eastern Russia*. *Jpn J Infect Dis*, 2001. **54**(1): p. 1-11.
- [604] Tapsall, J.W., et al., *Failure of 500 mg ciprofloxacin therapy in male urethral gonorrhoea*. *Med J Aust*, 1992. **156**(2): p. 143.
- [605] Tarr, P.I., et al., *Hemolytic-uremic syndrome in a six-year-old girl after a urinary tract infection with Shiga-toxin-producing Escherichia coli O103:H2*. *N Engl J Med*, 1996. **335**: p. 635-638.
- [606] Tauxe, R.V., et al., *Antimicrobial resistance of Shigella isolates in the USA: the importance of international travelers*. *Journal of Infectious Diseases*, 1990. **162**(5): p. 1107-1111.
- [607] Tauxe, R.V., *Emerging foodborne diseases: an evolving public health challenge*. *Emerging Infectious Diseases*, 1997. **3**(4): p. 425-34.
- [608] Taylor, R.M., et al., *Sindbis virus: a newly recognized arthropodtransmitted virus*. *The American Journal of Tropical Medicine and Hygiene*, 1955. **4**(5): p. 844-862.
- [609] Taylor, L.H., S.M. Latham, and M.E. Woolhouse, *Risk factors for human disease emergence*. *Philosophical Transactions of the Royal Society of London. Series B, Biological Sciences*, 2001. **356**(1411): p. 983-989.
- [610] Tedder, R.S., et al., *A novel lymphotropic herpesvirus*. *Lancet*, 1987. **2**: p. 390-392.
- [611] Tedesco, F.J., R.W. Barton, and D.H. Alpers, *Clindamycin-associated colitis. A prospective study*. *Annals of Internal Medicine*, 1974. **81**(4): p. 429-433.
- [612] Teixeira, A.R., et al., *Emerging Chagas disease: trophic network and cycle of transmission of Trypanosoma cruzi from palm trees in the Amazon*. *Emerging Infectious Diseases*, 2001. **7**(1): p. 100-12.
- [613] Tesh, R.B., et al., *Mayaro virus disease: an emerging mosquito-borne zoonosis in tropical South America*. *Clinical Infectious Diseases*, 1999. **28**(1): p. 67-73.
- [614] Theiler, M. and W.G. Downs, *The Arthropod-borne Viruses of Vertebrates*. 1973, Yale: Yale University Press.
- [615] Thomas, T.J., R.E. Andrews, Jr., and C.O. Thoen, *Molecular cloning and characterization of Mycobacterium paratuberculosis promoters in Escherichia coli*. *Vet Microbiol*, 1992. **32**(3-4): p. 351-62.
- [616] Thomassen, M.J., et al., *Pseudomonas cepacia colonization among patients with cystic fibrosis. A new opportunist*. *The American Review of Respiratory Disease*, 1985. **131**(5): p. 791-796.
- [617] Thompson, W.H. and A.S. Evans, *California Encephalitis Virus Studies in Wisconsin*. *American Journal of Epidemiology*, 1965. **81**: p. 230-244.
- [618] Thompson, W.H., B. Kalfayan, and R.O. Anslow, *Isolation of California Encephalitis Group Virus from a Fatal Human Illness*. *American Journal of Epidemiology*, 1965. **81**: p. 245-253.
- [619] Thompson, D.F., et al., *Bancroftian filariasis distribution and diurnal temperature differences in the southern Nile delta*. *Emerging Infectious Diseases*, 1996. **2**(3): p. 234-5.
- [620] Thompson, R.C., *Giardiasis as a re-emerging infectious disease and its zoonotic potential*. *Int J Parasitol*, 2000. **30**(12-13): p. 1259-67.
- [621] Thomson, M.C., et al., *Satellite mapping of Loa loa prevalence in relation to ivermectin use in west and central Africa*. *Lancet*, 2000. **356**(9235): p. 1077-8.
- [622] Thornton, D.J., et al., *Cat bite transmission of Yersinia pestis infection to man*. *J S Afr Vet Assoc*, 1975. **46**(2): p. 165-9.

- [623] Totten, P.A., et al., *Campylobacter cinaedi* (sp. nov.) and *Campylobacter fennelliae* (sp. nov.): two new *Campylobacter* species associated with enteric disease in homosexual men. *Journal of Infectious Diseases*, 1985. **151**(1): p. 131-139.
- [624] Trallero, G., et al., *First epidemic of aseptic meningitis due to echovirus type 13 among Spanish children*. *Epidemiol Infect*, 2003. **130**(2): p. 251-6.
- [625] Tsukamura, M., H. Shimoide, and W.B. Shaefer, *A possible new pathogen of group iii Mycobacteria*. *J Gen Microbiol*, 1975. **88**(2): p. 377-80.
- [626] Tully, J.G., et al., *A newly discovered mycoplasma in the human urogenital tract*. *Lancet*, 1981. **1**(8233): p. 1288-1291.
- [627] Tzipori, S., et al., *Studies in gnotobiotic piglets on non-O157:H7 Escherichia coli serotypes isolated from patients with hemorrhagic colitis*. *Gastroenterology*, 1988. **94**(3): p. 590-7.
- [628] Uh, Y., et al., *Vibrio alginolyticus acute gastroenteritis: report of two cases*. *Clinical Microbiology and Infection*, 2001. **7**(2): p. 104-106.
- [629] Umasankar, S., R.A. Wall, and J. Berger, *A case of ciprofloxacin-resistant typhoid fever*. *Communicable Disease Report. CDR Review*, 1992. **2**(12): p. R139-40.
- [630] UNDP, W.R.I.i.c.w.U.a., *World Resources 1996-7*. 1996, New York: Oxford University Press.
- [631] Urban, C., et al., *Polymyxin B-Resistant Acinetobacter baumannii Clinical Isolate Susceptible to Recombinant BPI and Cecropin P1*. *Antimicrobial Agents and Chemotherapy*, 2001. **45**(3): p. 994-995.
- [632] Uttley, A.H., et al., *Vancomycin-resistant enterococci*. *Lancet*, 1988. **1**(8575-6): p. 57-8.
- [633] Vainrub, B. and R. Salas, *Latin American hemorrhagic fever*. *Infect Dis Clin North Am*, 1994. **8**(1): p. 47-59.
- [634] van der Meer, M.G. and S.L. Brug, *Infection à Pneumocystis chez l'homme et chez les animaux*. *Amer Soc Belge Méd Trop*, 1942. **22**: p. 301-309.
- [635] Van Nieuwenhove, S., et al., *Sleeping sickness resurgence in the DRC: the past decade*. *Trop Med Int Health*, 2001. **6**(5): p. 335-41.
- [636] Vavra, J., et al., *Microsporidia of the genus Trachipleistophora--causative agents of human microsporidiosis: description of Trachipleistophora anthropophthera n. sp. (Protozoa: Microsporidia)*. *J Eukaryot Microbiol*, 1998. **45**(3): p. 273-83.
- [637] Venugopal, K., et al., *Analysis of the structural protein gene sequence shows Kyasanur Forest disease virus as a distinct member in the tick-borne encephalitis virus serocomplex*. *J Gen Virol*, 1994. **75** ( Pt 1): p. 227-232.
- [638] Vinson, J.W., *In vitro cultivation of the rickettsial agent of trench fever*. *Bull World Health Organ*, 1966. **35**: p. 155-164.
- [639] Vinzent, R., J. Dumas, and N. Picard, *Septicémie grave au cours de la grossesse due à un vibrion: avortement consécutif*. *Bulletin de l'Académie Nationale de Médecine*, 1993. **131**: p. 90-93.
- [640] Visvesvara, G.S., et al., *Leptomyxid ameba, a new agent of amebic meningoencephalitis in humans and animals*. *J Clin Microbiol*, 1990. **28**(12): p. 2750-6.
- [641] Walsh, T.J. and A.H. Groll, *Emerging fungal pathogens: evolving challenges to immunocompromised patients for the twenty-first century*. *Transpl Infect Dis*, 1999. **1**(4): p. 247-61.
- [642] Wang, J.H., et al., *Primary liver abscess due to Klebsiella pneumoniae in Taiwan*. *Clinical Infectious Diseases*, 1998. **26**(6): p. 1434-8.
- [643] Wang, S.A., et al., *Multidrug-resistant Neisseria gonorrhoeae with decreased susceptibility to cefixime-Hawaii, 2001*. *Clinical Infectious Diseases*, 2003. **37**(6): p. 849-852.
- [644] Warnock, D.W., et al., *Fluconazole resistance in Candida glabrata*. *Lancet*, 1988. **2**(8623): p. 1310.
- [645] Warwick, W.J., *The cat-scratch syndrome, many diseases or one disease?* *Prog Med Virol*, 1967. **9**: p. 256-301.
- [646] Watanabe, T., *Infective heredity of multiple drug resistance in bacteria*. *Bacteriological Reviews*, 1963. **27**: p. 87-115.
- [647] Watanabe, M., et al., *Transferable imipenem resistance in Pseudomonas aeruginosa*. *Antimicrobial Agents and Chemotherapy*, 1991. **35**(1): p. 147-151.

- [648] Watson, K.C. and S. Kallichurum, *Brain abscess due to Trichosporon cutaneum*. J Med Microbiol, 1970. **3**(1): p. 191-3.
- [649] Watts, D.M., et al., *Crimean-Congo Hemorrhagic Fever*, in *The Arboviruses: Epidemiology and Ecology*, T.P. Monath, Editor. 1988, CRC Press: Boca Raton, Florida. p. 177 - 222.
- [650] Weinberger, M., et al., *Disseminated infection with Mycobacterium gordonae: report of a case and critical review of the literature*. Clinical Infectious Diseases, 1992. **14**(6): p. 1229-1239.
- [651] Weinstein, M.R., et al., *Invasive infections due to a fish pathogen, Streptococcus iniae*. S. iniae Study Group. N Engl J Med, 1997. **337**(9): p. 589-94.
- [652] Weinstock, D.M. and A.E. Brown, *Rhodococcus equi: an emerging pathogen*. Clinical Infectious Diseases, 2002. **34**(10): p. 1379-1385.
- [653] Weiszfeiler, G., V. Karasseva, and E. Karczag, *A new mycobacterium species: Mycobacterium asiaticum n. sp.* Acta Microbiologica Academiae Scientiarum Hungaricae 1971. **18**(4): p. 247-252.
- [654] Wen, H. and W.G. Yang, *Public health importance of cystic echinococcosis in China*. Acta Tropica, 1997. **67**(133-145).
- [655] Wernsdorfer, W.H. and D. Payne, *The dynamics of drug resistance in Plasmodium falciparum*. Pharmacol Ther, 1991. **50**(1): p. 95-121.
- [656] Western, K.A., et al., *Babesiosis in a Massachusetts resident*. N Engl J Med, 1970. **283**(16): p. 854-6.
- [657] White, N.J., *Drug resistance in malaria*. British Medical Bulletin, 1998. **54**(3): p. 703-715.
- [658] WHO, *WHO Report on Global Surveillance of Epidemic-prone Infectious Diseases*. 2000, World Health Organization: Geneva.
- [659] WHO. *African trypanosomiasis or sleeping sickness*. 2001 [cited 2004 5/13]; Available from: <http://www.who.int/mediacentre/factsheets/fs259/en/print.html>.
- [660] WHO, *Global prevalence and incidence of selected curable sexually transmitted infections*. 2001, World Health Organization: Geneva.
- [661] WHO. *Crimean-Congo haemorrhagic fever (C-CHF) in Kosovo – update 5*. 2001 [cited 2003; Available from: <http://www.who.int/disease-outbreak-news/n2001/june/29june2001.html>.
- [662] Wieler, L.H., et al., *Enterohemorrhagic Escherichia coli (EHEC) strains of serogroup O118 display three distinctive clonal groups of EHEC pathogens*. J Clin Microbiol, 2000. **38**(6): p. 2162-9.
- [663] Wigle, W.D., et al., *Bovine tuberculosis in humans in Ontario. The epidemiologic features of 31 active cases occurring between 1964 and 1970*. Am Rev Respir Dis, 1972. **106**: p. 528-534.
- [664] Will, R.G., et al., *A new variant of Creutzfeldt-Jakob disease in the UK*. Lancet, 1996. **347**(9006): p. 921-925.
- [665] Williams, M.C. and J.P. Woodall, *O'nyong-nyong fever: an epidemic virus disease in East Africa. II. Isolation and some properties of the virus*. Trans R Soc Trop Med Hyg, 1961. **55**: p. 135-41.
- [666] Williams, R.J., et al., *An outbreak of hantavirus pulmonary syndrome in western Paraguay*. The American Journal of Tropical Medicine and Hygiene, 1997. **57**(3): p. 274-282.
- [667] Wilson, M.E., A.D. Brush, and M.C. Meany, *Murine typhus acquired during short-term urban travel*. The American Journal of Medicine, 1989. **87**: p. 233-234.
- [668] Wingard, J.R., W.G. Merz, and R. Saral, *Candida tropicalis: a major pathogen in immunocompromised patients*. Annals of Internal Medicine, 1979. **91**(4): p. 539-543.
- [669] Witzig, R.S., et al., *Clinical manifestations and implications of coinfection with Mycobacterium kansasii and human immunodeficiency virus type 1*. Clinical Infectious Diseases, 1995. **21**(1): p. 77-85.
- [670] Wongsrichanalai, C., et al., *Drug resistant malaria on the Thai-Myanmar and Thai-Cambodian borders*. Southeast Asian J Trop Med Public Health, 2001. **32**(1): p. 41-9.
- [671] Wongsrichanalai, C., et al., *Epidemiology of drug-resistant malaria*. Lancet Infect Dis, 2002. **2**(4): p. 209-18.
- [672] Wood, C.A., *Rifampicin-resistant staphylococcal bacteraemia in patient with AIDS receiving rifabutin*. Lancet, 1994. **343**(8902): p. 919-20.



- [673] Woodall, J.P., et al., *The Isolation of Sindbis Virus from the Mosquito *Mansonia (Coquillettidia) Fuscopennata (Theobald)* in Uganda*. *Annals of Tropical Medicine and Parasitology*, 1964. **58**: p. 383-389.
- [674] Woodford, N., et al., *Current perspectives on glycopeptide resistance*. *Clinical Microbiology Reviews*, 1995. **8**(4): p. 585-615.
- [675] Xu, P., et al., *New orbiviruses isolated from patients with unknown fever and encephalitis in Yunnan province*. *Chinese Journal of Virology*, 1990. **6**: p. 27-33.
- [676] Yamanishi, K., et al., *Identification of human herpesvirus-6 as a causal agent for exanthem subitum*. *Lancet*, 1988. **1**(8594): p. 1065-7.
- [677] Yodoi, J. and T. Uchiyama, *Diseases associated with HTLV-I: virus, IL-2 receptor dysregulation and redox regulation*. *Immunol Today*, 1992. **13**(10): p. 405-11.
- [678] Young, N.A., et al., *Disseminated infection by *Fusarium moniliforme* during treatment for malignant lymphoma*. *J Clin Microbiol*, 1978. **7**(6): p. 589-94.
- [679] Zaki, S.R., et al., *Retrospective diagnosis of hantavirus pulmonary syndrome, 1978-1993: implications for emerging infectious diseases*. *Archives of Pathology and Laboratory Medicine*, 1996. **120**(2): p. 134-139.
- [680] Zaki, A.M., *Isolation of a flavivirus related to the tick-borne encephalitis complex from human cases in Saudi Arabia*. *Trans R Soc Trop Med Hyg*, 1997. **91**(2): p. 179-81.
- [681] Zavala-Velazquez, *Lancet*, 2000. **356**(1079-1080).
- [682] Zeligman, I., *Mycobacterium marinum granuloma. A disease acquired in the tributaries of Chesapeake Bay*. *Archives of Dermatology*, 1972. **106**(1): p. 26-31.
- [683] Zeller, H.G., *Dengue, arbovirus and migrations in the Indian Ocean*. *Bulletin de la Société de Pathologie Exotique*, 1998. **91**(1): p. 56-60.
- [684] Zender, H.O., et al., *A case of *Encephalitozoon cuniculi* peritonitis in a patient with AIDS*. *American Journal of Clinical Pathology*, 1989. **92**(3): p. 352-6.
- [685] Zhang, L., X.Z. Li, and K. Poole, *Multiple antibiotic resistance in *Stenotrophomonas maltophilia*: Involvement of a multidrug efflux system*. *Antimicrob Agents Chemother*, 2000. **44**: p. 287-293.
- [686] Zhang, L., X.Z. Li, and K. Poole, *SmeDEF multidrug efflux pump contributes to intrinsic multidrug resistance in *Stenotrophomonas maltophilia**. *Antimicrob Agents Chemother*, 2001. **45**: p. 3497-3503.
- [687] Zhu, T., et al., *An African HIV-1 sequence from 1959 and implications for the origin of the epidemic*. *Nature*, 1998. **391**(6667): p. 594-7.
- [688] Zhu, J.Q., et al., *Biochemical and biophysical analysis of heptad repeat regions from the fusion protein of Menangle virus, a newly emergent paramyxovirus*. *Archives of Virology*, 2003. **148**(7): p. 1301-1316.
- [689] Zinnser, H., *Rats, Lice, and History*. 1935, Boston: Little Brown.
- [690] ProMED, *SARS - Worldwide (190): China, susp. case*. *ProMED Digest*, 2003. **2003**(477).
- [691] Anderson, R.M., et al., *Transmission dynamics and epidemiology of BSE in British cattle*. *Nature*, 1996. **382**(6594): p. 779-788.
- [692] Anderson, J.F., et al., *Isolation of West Nile virus from mosquitoes, crows, and a Cooper's hawk in Connecticut*. *Science*, 1999. **286**: p. 2331-2333.
- [693] Anon., *Haemophilus Influenzae Meningitis Resistant to Ampicillin*. *Medical Letter on Drugs and Therapeutics*, 1974. **16**(7): p. 29-29.
- [694] Bloom, B.R. and C.J.L. Murray, *Tuberculosis - Commentary on a Reemergent Killer*. *Science*, 1992. **257**(5073): p. 1055-1064.
- [695] CDC, *Ampicillin resistan *Haemophilus influenzae* - Maryland, Georgia*. *Morbidity and Mortality Weekly Reports*, 1974. **13**: p. 77-78.
- [696] CDC, *Update: Outbreak of Nipah Virus - Malaysia and Singapore, 1999*. *MMWR*, 1999. **48**(16): p. 325-337.
- [697] Chua, K.B., et al., *Fatal encephalitis due to Nipah virus among pig-farmers in Malaysia*. *Lancet* 1999. **354**: p. 1257-1259.
- [698] Chua, K., et al., *Nipah virus: A recently emergent deadly paramyxovirus*. *Science*, 2000. **288**: p. 1432-35.

- [699] Dabernat, H., *Haemophilus-Influenzae - Epidemiologic Problems of Resistance against Ampicillin, Tetracycline, Chloramphenicol and Kanamycin*. Infection, 1987. **15**: p. S103-S108.
- [700] Daszak, P., et al., *The emergence of Nipah and Hendra virus: pathogen dynamics across a wildlife-livestock-human continuum*, in *Disease Ecology: Community Structure and Pathogen Dynamics.*, S.K. Collinge and C. Ray, Editors. 2006 Oxford University Press: Oxford, U.K.
- [701] Donnelly, C.A., et al., *Recent trends in the BSE epidemic*. Nature, 1997. **389**(6654): p. 903-903.
- [702] Drosten, C., et al., *Identification of a novel coronavirus in patients with severe acute respiratory syndrome*. New England Journal of Medicine, 2003. **348**(20): p. 1967-1976.
- [703] Eickhoff, T.C., J.M. Ehret, and R.D. Baines, *Characterization of an Ampicillin-Resistant Haemophilus-Influenzae Type-B*. Antimicrobial Agents and Chemotherapy, 1976. **9**(6): p. 889-892.
- [704] Ellis, D.S., D.I.H. Simpson, and S. Stamford, *Ebola Virus from Sudan - Ultrastructural Studies of Virus-Particles in Human Liver from Postmortems Carried out in Field*. Transactions of the Royal Society of Tropical Medicine and Hygiene, 1978. **72**(4): p. 439-439.
- [705] Formenty, P., et al., *Human infection due to Ebola virus, subtype Cote d'Ivoire: Clinical and biologic presentation*. Journal of Infectious Diseases, 1999. **179**: p. S48-S53.
- [706] Formenty, P., et al., *Ebola virus outbreak among wild chimpanzees living in a rain forest of Cote d'Ivoire*. Journal of Infectious Diseases, 1999. **179**: p. S120-S126.
- [707] Gad, A.M., et al., *A Possible Route for the Introduction of Rift-Valley Fever Virus into Egypt During 1977*. Journal of Tropical Medicine and Hygiene, 1986. **89**(5): p. 233-236.
- [708] Gao, F., et al., *Human infection by genetically diverse SIVsm-related HIV-2 in West Africa* Nature, 1992. **358**: p. 495-499.
- [709] Gao, F., et al., *Origin of HIV-1 in the chimpanzee Pan troglodytes*. Nature, 1999. **397**: p. 436-441.
- [710] Geisbert, T.W., et al., *Association of Ebola-Related Reston Virus-Particles and Antigen with Tissue Lesions of Monkeys Imported to the United-States*. Journal of Comparative Pathology, 1992. **106**(2): p. 137-152.
- [711] Ghani, A.C., et al., *Updated projections of future vCJD deaths in the UK*. BMC Infectious Diseases, 2003. **3**.
- [712] Ghani, A.C., et al., *Factors determining the pattern of the variant Creutzfeldt-Jakob disease (vCJD) epidemic in the UK*. Proceedings of the Royal Society of London Series B-Biological Sciences, 2003. **270**(1516): p. 689-698.
- [713] Guan, Y., et al., *Isolation and characterization of viruses related to the SARS coronavirus from animals in Southern China*. Science, 2003. **302**(5643): p. 276-278.
- [714] Guernsey, B.G. and M.R. Alexander, *Multi-Drug-Resistant Pulmonary Tuberculosis - Continuing Problem*. Drug Intelligence & Clinical Pharmacy, 1979. **13**(7-8): p. 430-436.
- [715] Hahn, B.H., et al., *Aids as a zoonosis: Scientific and public health implications*. Science, 2000. **287**: p. 607-614.
- [716] Holmes, E.C., *The phylogeography of human viruses*. Molecular Ecology, 2004. **13**(4): p. 745-756.
- [717] Hoogstraal, H., et al., *Rift-Valley Fever Epizootic in Egypt 1977-78 .2. Ecological and Entomological Studies*. Transactions of the Royal Society of Tropical Medicine and Hygiene, 1979. **73**(6): p. 624-629.
- [718] Hooper, E., *The river*. 1999, Boston, Mass.: Little, Brown & Co.
- [719] Johnson, B.K. and A.C. Chanas, *Rift-Valley Fever in Egypt, 1977-78*. Transactions of the Royal Society of Tropical Medicine and Hygiene, 1980. **74**(1): p. 115-115.
- [720] Jorgensen, J.H., *Update on Mechanisms and Prevalence of Antimicrobial Resistance in Haemophilus-Influenzae*. Clinical Infectious Diseases, 1992. **14**(5): p. 1119-1123.
- [721] Klenk, H.-D., *Marburg and Ebola Viruses, Current Topics in Microbiology and Immunology*. Vol. 235. 1999, Berlin: Springer.
- [722] Komar, N., *West Nile viral encephalitis*. Rev. Sci. Tech. Off. Int. Epiz. , 2000. **19**: p. 166-167.

- [723] Kroll, J.S., et al., *Characterisation and genetic organisation of a 24-MDa plasmid from the Brazilian Purpuric Fever clone of Haemophilus influenzae biogroup aegyptius*. Plasmid, 2002. **48**(1): p. 38-48.
- [724] Kunii, O., et al., *Risk for Ebola virus infection in Cote d'Ivoire*. Emerging Infectious Diseases, 1999. **5**(2): p. 312-313.
- [725] Lanciotti, R.S., et al., *Origin of the West Nile virus responsible for an outbreak of encephalitis in the northeastern United States*. Science, 1999. **286**(5448): p. 2333-7.
- [726] Laughlin, L.W., et al., *Epidemic Rift-Valley Fever in Egypt - Observations of the Spectrum of Human Illness*. Transactions of the Royal Society of Tropical Medicine and Hygiene, 1979. **73**(6): p. 630-633.
- [727] Long, R., et al., *Transcontinental spread of multidrug-resistant Mycobacterium bovis*. American Journal of Respiratory and Critical Care Medicine, 1999. **159**(6): p. 2014-2017.
- [728] Marx, P.A., C. Apetrei, and E. Drucker, *AIDS as a zoonosis? Confusion over the origin of the virus and the origin of the epidemics*. Journal of Medical Primatology, 2004. **33**(5-6): p. 220-226.
- [729] Meegan, J.M., *Rift-Valley Fever Epizootic in Egypt 1977-78 .1. Description of the Epizootic and Virological Studies*. Transactions of the Royal Society of Tropical Medicine and Hygiene, 1979. **73**(6): p. 618-623.
- [730] Meegan, J.M., H. Hoogstraal, and M.I. Moussa, *Epizootic of Rift Valley Fever in Egypt in 1977*. Veterinary Record, 1979. **105**(6): p. 124-125.
- [731] Meegan, J.M., et al., *Experimental Transmission and Field Isolation Studies Implicating Culex-Pipiens as a Vector of Rift-Valley Fever Virus in Egypt*. American Journal of Tropical Medicine and Hygiene, 1980. **29**(6): p. 1405-1410.
- [732] Melski, J., et al., *Multistate outbreak of monkeypox - Illinois, Indiana, and Wisconsin, 2003*. MMWR - Morbidity and Mortality Weekly Reports, 2003. **52**: p. 537-540.
- [733] Miranda, M.E., et al., *Epidemiology of Ebola (subtype Reston) virus in the Philippines, 1996*. Journal of Infectious Diseases, 1999. **179**: p. S115-S119.
- [734] Miranda, M.E.G., et al., *Chronological and spatial analysis of the 1996 Ebola Reston virus outbreak in a monkey breeding facility in the Philippines*. Experimental Animals, 2002. **51**(2): p. 173-179.
- [735] Miranzi, S.D.C., S.A. de Moraes, and I.C.M. de Freitas, *Trends in Haemophilus influenzae type b meningitis in Brazil in children under five years of age from 1983 through 2002*. Revista Da Sociedade Brasileira De Medicina Tropical, 2006. **39**(5): p. 473-477.
- [736] Perkins, B.A. and C.V. Broome, *Brazilian Purpuric Fever Identified in a New Region of Brazil*. Journal of Infectious Diseases, 1992. **165**: p. S16-S19.
- [737] Peterson, A.T., J.T. Bauer, and J.N. Mills, *Ecologic and geographic distribution of filovirus disease*. Emerging Infectious Diseases, 2004. **10**(1): p. 40-47.
- [738] Pourrut, X., et al., *The natural history of Ebola virus in Africa*. Microbes and Infection, 2005. **7**(7-8): p. 1005-1014.
- [739] Rex, J.H., M.G. Rinaldi, and M.A. Pfaller, *Resistance of Candida Species to Fluconazole*. Antimicrobial Agents and Chemotherapy, 1995. **39**(1): p. 1-8.
- [740] Robbins, K.E., et al., *U.S. Human Immunodeficiency Virus Type 1 epidemic: Date of origin, population history, and characterization of early strains*. Journal of Virology, 2003. **77**: p. 6359-6366.
- [741] Rollin, P.E., et al., *Ebola (subtype Reston) virus among quarantined nonhuman primates recently imported from the Philippines to the United States*. Journal of Infectious Diseases, 1999. **179**: p. S108-S114.
- [742] Sellers, R.F., D.E. Pedgley, and M.R. Tucker, *Rift-Valley Fever, Egypt 1977 - Disease Spread by Windborne Insect Vectors*. Veterinary Record, 1982. **110**(4): p. 73-77.
- [743] Taylor, C.O. and J.B. Carter, *Buccal Cellulitis in an Infant Due to Ampicillin-Resistant Haemophilus-Influenzae*. Journal of Oral and Maxillofacial Surgery, 1986. **44**(3): p. 234-236.
- [744] Tomori, O., A. Fabiyi, and F. Murphy, *Characterization of Orungo Virus, an Orbivirus from Uganda and Nigeria*. Archives of Virology, 1976. **51**(4): p. 285-298.
- [745] Turk, D.C., *Ampicillin-Resistant Haemophilus Influenzae Meningitis*. Lancet, 1974. **1**(7855): p. 453-453.

- [746] Woolhouse, M.E.J. and R.M. Anderson, *Understanding the epidemiology of BSE*. Trends in Microbiology, 1997. **5**(11): p. 421-424.
- [747] Xu, R.H., et al., *Epidemiologic clues to SARS origin in China*. Emerging Infectious Diseases, 2004. **10**(6): p. 1030-1037.



### 1.3. Comparison to Other Variable Definitions

A number of other studies have investigated the biological characteristics of human pathogens<sup>1-3</sup> (Table S2). Our analysis investigates the spatial, temporal and biological characteristics of the initial emergence of a disease in a human population ('an EID event') and predicts future patterns of disease emergence. As such, direct comparisons to the criteria and definitions used in<sup>1-3</sup> are only sometimes possible. Following<sup>1-3</sup>, we classify pathogens involved in an EID event taxonomically into 5 main types: (viruses – including prions), bacteria (including rickettsia), fungi, protozoa and helminthes. We also follow the definition of vector-borne pathogens (transmission by biting or mechanical transfer by arthropods) in<sup>1-3</sup>.

| Pathogen type | Human EID events (current paper) | Human emerging pathogens (refs <sup>1-3</sup> ) | Total human pathogens (refs <sup>1-3</sup> ) |
|---------------|----------------------------------|-------------------------------------------------|----------------------------------------------|
| Bacteria      | 49.3%                            | 30% <sup>1,2</sup> 10% <sup>3</sup>             | 38% <sup>1,2</sup> 41% <sup>3</sup>          |
| Viruses       | 25.1%                            | 44% <sup>1,2</sup> 37% <sup>3</sup>             | 15% <sup>1,2</sup> 15% <sup>3</sup>          |
| Fungi         | 6.3%                             | 9% <sup>1,2</sup> 7% <sup>3</sup>               | 22% <sup>1,2</sup> 23% <sup>3</sup>          |
| Protozoa      | 10.7%                            | 11% <sup>1,2</sup> 25% <sup>3</sup>             | 5% <sup>1,2</sup> 4% <sup>3</sup>            |
| Helminths     | 3.3%                             | 6% <sup>1,2</sup> 3% <sup>3</sup>               | 20% <sup>1,2</sup> 20% <sup>3</sup>          |
| Vector        | 22.8%                            | 28% <sup>2</sup>                                | 14% <sup>2</sup>                             |
| Zoonotic      | 60.3%                            | 75% <sup>2</sup> 73% <sup>3</sup>               | 61% <sup>2</sup> 58% <sup>3</sup>            |
| Emerging      | -                                | -                                               | 13% <sup>2</sup> 13% <sup>3</sup>            |

**Table S2. Characteristics of human pathogens compared to those involved in EID events.**

However, the definitions of zoonotic pathogens and emerging pathogens that we use are slightly different than in<sup>1-3</sup>. The definition previously used in<sup>2,3</sup> for zoonotic pathogens follows the World Health Organization's (WHO) definition as 'diseases that are naturally transmitted between vertebrates and humans (not including vectors)'. Pathogens which recently evolved from related animal pathogens (e.g., HIV-1), but are no longer transmitted between animals and humans were not regarded as zoonotic by these papers. This definition was not useful for our analysis as we wanted to categorize the source of the first emergence event into humans – i.e., where the pathogen originated. Our temporal and spatial data for these zoonoses therefore applies to the pathogen causing the event at the moment of transmission from animals into humans, prior to its evolution into the pathogen responsible for large scale emergence (i.e., SIV-1 for HIV-1). Our definition of zoonoses also differs from<sup>2,3</sup> in that we consider only those pathogens which are

thought to have emerged due to transmission from a non-human animal to human, rather than those 'naturally transmitted between these hosts', i.e., we consider the direction of the transmission important. Emerging pathogens were defined in <sup>2,3</sup> (following WHO) as those that have appeared in a human population for the first time, or have occurred previously, but are increasing in incidence or expanding into areas where they had not previously been reported. We broadly follow this definition by apply these criteria to define an EID event but also apply the criteria used in <sup>4-8</sup>. Thus in our database, an emerging infectious disease is a disease that has recently increased in incidence, impact or geographic range. Specifically it is caused by a pathogen that has recently evolved or entered the human population for the first time, or which has occurred previously, but is increasing in incidence or expanding into an area in which it has not previously been reported, or which has significantly changed its pathological or clinical presentation. We directly compare our results (EID events) with previously published papers in Table S2.

## References

1. Cleaveland, S., Laurenson, M. K. & Taylor, L. H. Diseases of humans and their domestic mammals: pathogen characteristics, host range and the risk of emergence. *Philosophical Transactions of the Royal Society of London Series B-Biological Sciences* 356, 991-999 (2001).
2. Taylor, L. H., Latham, S. M. & Woolhouse, M. E. J. Risk factors for human disease emergence. *Philosophical Transactions of the Royal Society of London, B.* 356, 983-989 (2001).
3. Woolhouse, M. E. J. & Gowtage-Sequeria, S. Host range and emerging and reemerging pathogens. *Emerging Infectious Diseases* 11, 1842-1847 (2005).
4. Smolinski, M. S., Hamburg, M. A. & Lederberg, J. *Microbial Threats to Health: Emergence, Detection, and Response* (The National Academies Press, Washington D.C., 2003).
5. Daszak, P., Cunningham, A. A. & Hyatt, A. D. Emerging infectious diseases of wildlife - threats to biodiversity and human health. *Science* 287, 443-449 (2000).
6. Morse, S. S. in *Emerging Viruses* (ed. Morse, S. S.) 10-28 (Oxford University Press, New York, 1993).
7. Lederberg, J., Shope, R. E. & Oakes, S. C. J. *Emerging Infections: Microbial Threats to Health in the United States* (Institute of Medicine, National Academy Press, Washington D.C., 1992).
8. Morse, S. S. Factors in the emergence of infectious disease. *Emerging Infectious Diseases* 1, 7-15 (1995).

## 2. Supplementary Figure 1.

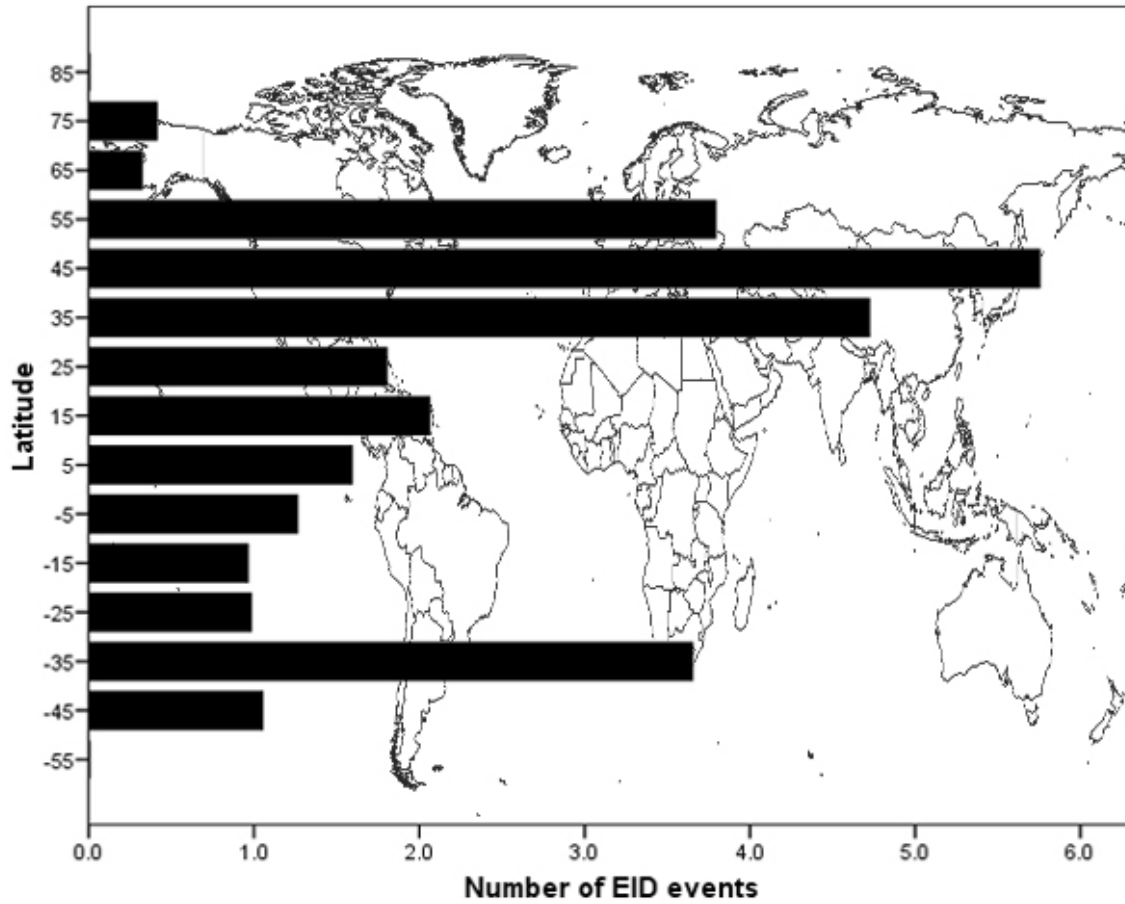

**Latitudinal gradient in EID events.** Number of all EID events per million square kilometres of land area at each 10 degree latitudinal band.

## 3. Supplementary Figure 2.

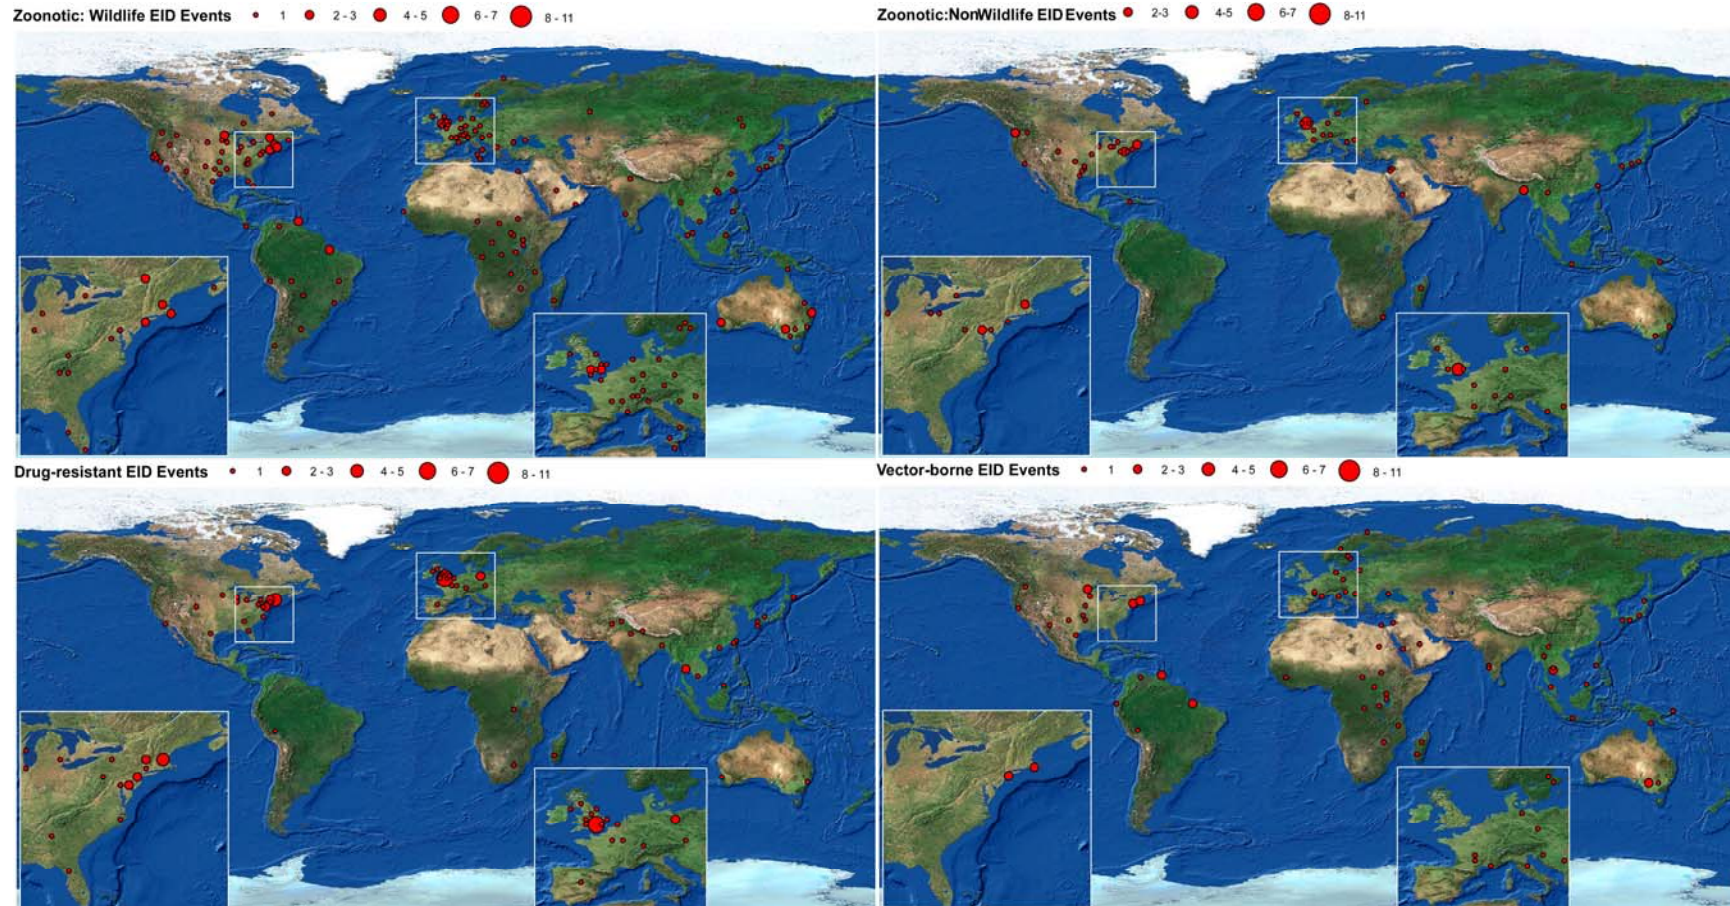

**Global richness maps of EID events from 1940-2004 split by category.** Maps are derived for EID events caused by zoonotic pathogens originating in wildlife or non-wildlife species, and EID events due to drug-resistant and vector-borne pathogens. Circles represent one degree grid cells where the area of the circle is proportional to the number of events in the cell.



## 4. Supplementary Table 3.

## Random Draw 1

| Pathogen Type                                      | All                   |      | Zoonotic: wildlife |      | Zoonotic: non-wildlife |      | Drug-resistant |      | Vector-borne |      |
|----------------------------------------------------|-----------------------|------|--------------------|------|------------------------|------|----------------|------|--------------|------|
| No. of EID event grid cells                        | 289                   |      | 150                |      | 53                     |      | 59             |      | 83           |      |
|                                                    | b                     | B    | b                  | B    | b                      | B    | b              | B    | b            | B    |
| log(JID articles)                                  | 0.38***               | 1.47 | 0.35***            | 1.42 | 0.49***                | 1.62 | 0.48***        | 1.62 | 0.20***      | 1.23 |
| log(Human Pop. Density) (Persons/km <sup>2</sup> ) | 0.68***               | 1.98 | 0.59***            | 1.81 | 1.05***                | 2.85 | 1.10***        | 3.01 | 0.42***      | 1.52 |
| Human Pop. Growth                                  | 0.57***               | 1.78 | 0.36               | 1.44 | 0.86*                  | 2.37 | 1.57***        | 4.78 | 0.31         | 1.37 |
| Latitude (decimal degrees)                         | 0.016*                | 1.02 | 0.010              | 1.01 | 0.038*                 | 1.04 | 0.058***       | 1.06 | -0.009       | 0.99 |
| Rainfall (mm)                                      | 0.23x10 <sup>-3</sup> | 1.00 | 0.000              | 1.00 | 0.001                  | 1.00 | 0.000          | 1.00 | 0.000        | 1.00 |
| Wildlife Host Richness                             | 0.005*                | 1.01 | 0.008**            | 1.01 | -0.008                 | 0.99 | 0.008          | 1.01 | 0.005        | 1.01 |
| Constant                                           | -9.28***              |      | -9.14***           |      | -13.77***              |      | -15.56***      |      | -7.82***     |      |

## Random Draw 2

| Pathogen Type                                      | All      |      | Zoonotic: wildlife |      | Zoonotic: non-wildlife |      | Drug-resistant |      | Vector-borne |      |
|----------------------------------------------------|----------|------|--------------------|------|------------------------|------|----------------|------|--------------|------|
| No. of EID event grid cells                        | 288      |      | 147                |      | 49                     |      | 59             |      | 81           |      |
|                                                    | b        | B    | b                  | B    | b                      | B    | b              | B    | b            | B    |
| log(JID articles)                                  | 0.38***  | 1.46 | 0.37***            | 1.44 | 0.49***                | 1.63 | 0.53***        | 1.69 | 0.21***      | 1.24 |
| log(Human Pop. Density) (Persons/km <sup>2</sup> ) | 0.67***  | 1.96 | 0.58***            | 1.79 | 1.02***                | 2.78 | 1.14***        | 3.13 | 0.48***      | 1.61 |
| Human Pop. Growth                                  | 0.44**   | 1.55 | 0.09               | 1.09 | 0.87*                  | 2.39 | 1.68***        | 5.34 | 0.21         | 1.24 |
| Latitude (decimal degrees)                         | 0.02*    | 1.02 | 0.002              | 1.00 | 0.038*                 | 1.04 | 0.061***       | 1.06 | -0.006       | 0.99 |
| Rainfall (mm)                                      | 0.000*   | 1.00 | 0.000              | 1.00 | 0.000                  | 1.00 | 0.001*         | 1.00 | 0.000        | 1.00 |
| Wildlife Host Richness                             | 0.006*   | 1.01 | 0.008**            | 1.01 | -0.003                 | 1.00 | 0.007          | 1.01 | 0.007*       | 1.01 |
| Constant                                           | -9.28*** |      | -8.78***           |      | -13.84***              |      | -16.24***      |      | -8.21***     |      |

## Random Draw 3

| Pathogen Type                                      | All     |      | Zoonotic: wildlife |      | Zoonotic: non-wildlife |      | Drug-resistant |      | Vector-borne |      |
|----------------------------------------------------|---------|------|--------------------|------|------------------------|------|----------------|------|--------------|------|
| No. of EID event grid cells                        | 301     |      | 156                |      | 50                     |      | 64             |      | 86           |      |
|                                                    | b       | B    | b                  | B    | b                      | B    | b              | B    | b            | B    |
| log(JID articles)                                  | 0.36*** | 1.44 | 0.37***            | 1.45 | 0.42***                | 1.52 | 0.51***        | 1.66 | 0.17**       | 1.19 |
| log(Human Pop. Density) (Persons/km <sup>2</sup> ) | 0.67*** | 1.96 | 0.64***            | 1.90 | 0.88***                | 2.41 | 1.18***        | 3.27 | 0.47***      | 1.59 |
| Human Pop. Growth                                  | 0.53*** | 1.69 | 0.20               | 1.22 | 1.11**                 | 3.05 | 1.34***        | 3.82 | 0.15         | 1.16 |
| Latitude (decimal degrees)                         | 0.02**  | 1.02 | 0.017              | 1.02 | 0.024                  | 1.02 | 0.05**         | 1.05 | -0.008       | 0.99 |

|                        |          |      |          |      |           |      |           |      |          |      |
|------------------------|----------|------|----------|------|-----------|------|-----------|------|----------|------|
| Rainfall (mm)          | 0.000*   | 1.00 | 0.000    | 1.00 | 0.000     | 1.00 | 0.001*    | 1.00 | 0.000    | 1.00 |
| Wildlife Host Richness | 0.006**  | 1.01 | 0.01***  | 1.01 | -0.015*   | 0.99 | 0.003     | 1.00 | 0.005    | 1.01 |
| Constant               | -9.21*** |      | -9.81*** |      | -11.73*** |      | -15.52*** |      | -7.74*** |      |

**Random Draw 4**

| Pathogen Type                                      | All      |      | Zoonotic:<br>wildlife |      | Zoonotic: non-<br>wildlife |      | Drug-resistant |      | Vector-borne |      |
|----------------------------------------------------|----------|------|-----------------------|------|----------------------------|------|----------------|------|--------------|------|
| No. of EID event grid cells                        | 298      |      | 153                   |      | 52                         |      | 63             |      | 88           |      |
|                                                    | b        | B    | b                     | B    | b                          | B    | b              | B    | b            | B    |
| log(JID articles)                                  | 0.36***  | 1.44 | 0.34***               | 1.41 | 0.42***                    | 1.53 | 0.52***        | 1.67 | 0.17**       | 1.18 |
| log(Human Pop. Density) (Persons/km <sup>2</sup> ) | 0.67***  | 1.96 | 0.58***               | 1.79 | 0.98***                    | 2.67 | 1.19***        | 3.27 | 0.45***      | 1.56 |
| Human Pop. Growth                                  | 0.54***  | 1.72 | 0.29                  | 1.33 | 0.96*                      | 2.61 | 1.45***        | 4.26 | 0.24         | 1.27 |
| Latitude (decimal degrees)                         | 0.02**   | 1.02 | 0.017                 | 1.02 | 0.035*                     | 1.04 | 0.058***       | 1.06 | -0.006       | 0.99 |
| Rainfall (mm)                                      | 0.000*   | 1.00 | 0.000                 | 1.00 | 0.000                      | 1.00 | 0.000          | 1.00 | 0.000        | 1.00 |
| Wildlife Host Richness                             | 0.006*   | 1.01 | 0.01***               | 1.01 | -0.009                     | 0.99 | 0.006          | 1.01 | 0.004        | 1.01 |
| Constant                                           | -9.17*** |      | -9.46***              |      | -12.82***                  |      | -15.89***      |      | -7.80***     |      |

**Random Draw 5**

| Pathogen Type                                      | All      |      | Zoonotic:<br>wildlife |      | Zoonotic: non-<br>wildlife |      | Drug-resistant |      | Vector-borne |      |
|----------------------------------------------------|----------|------|-----------------------|------|----------------------------|------|----------------|------|--------------|------|
| No. of EID event grid cells                        | 300      |      | 154                   |      | 51                         |      | 63             |      | 87           |      |
|                                                    | b        | B    | b                     | B    | b                          | B    | b              | B    | b            | B    |
| log(JID articles)                                  | 0.35***  | 1.42 | 0.35***               | 1.41 | 0.45***                    | 1.52 | 0.47***        | 1.60 | 0.20***      | 1.22 |
| log(Human Pop. Density) (Persons/km <sup>2</sup> ) | 0.65***  | 1.92 | 0.56***               | 1.75 | 0.93***                    | 2.54 | 1.09***        | 2.99 | 0.43***      | 1.54 |
| Human Pop. Growth                                  | 0.42**   | 1.51 | 0.15                  | 1.16 | 0.92*                      | 2.52 | 1.50***        | 4.49 | 0.22         | 1.24 |
| Latitude (decimal degrees)                         | 0.01     | 1.01 | 0.01                  | 1.01 | 0.027                      | 1.03 | 0.05**         | 1.05 | -0.01        | 0.99 |
| Rainfall (mm)                                      | 0.000*   | 1.00 | 0.000                 | 1.00 | 0.001                      | 1.00 | 0.000*         | 1.00 | 0.000        | 1.00 |
| Wildlife Host Richness                             | 0.004    | 1.00 | 0.008**               | 1.01 | -0.011                     | 0.99 | 0.004          | 1.00 | 0.004        | 1.00 |
| Constant                                           | -8.69*** |      | -8.96***              |      | -12.40***                  |      | -14.88***      |      | -7.76***     |      |

**Random Draw 6**

| Pathogen Type                                      | All     |      | Zoonotic:<br>wildlife |      | Zoonotic: non-<br>wildlife |      | Drug-resistant |      | Vector-borne |      |
|----------------------------------------------------|---------|------|-----------------------|------|----------------------------|------|----------------|------|--------------|------|
| No. of EID event grid cells                        | 295     |      | 150                   |      | 53                         |      | 63             |      | 86           |      |
|                                                    | b       | B    | b                     | B    | b                          | B    | b              | B    | b            | B    |
| log(JID articles)                                  | 0.36*** | 1.43 | 0.34***               | 1.41 | 0.40***                    | 1.49 | 0.47***        | 1.59 | 0.21***      | 1.23 |
| log(Human Pop. Density) (Persons/km <sup>2</sup> ) | 0.66*** | 1.94 | 0.57***               | 1.77 | 0.91***                    | 2.49 | 1.03***        | 2.81 | 0.45***      | 1.57 |

|                            |          |      |          |      |           |      |           |      |          |      |
|----------------------------|----------|------|----------|------|-----------|------|-----------|------|----------|------|
| Human Pop. Growth          | 0.42*    | 1.52 | 0.15     | 1.16 | 1.31***   | 3.71 | 1.27***   | 3.56 | 0.10     | 1.10 |
| Latitude (decimal degrees) | 0.019**  | 1.02 | 0.015    | 1.02 | 0.04*     | 1.04 | 0.05**    | 1.05 | -0.015   | 0.99 |
| Rainfall (mm)              | 0.000**  | 1.00 | 0.000    | 1.00 | 0.001*    | 1.00 | 0.001**   | 1.00 | 0.000    | 1.00 |
| Wildlife Host Richness     | 0.006*   | 1.01 | 0.01***  | 1.01 | -0.01     | 0.99 | 0.000     | 1.00 | 0.003    | 1.00 |
| Constant                   | -9.22*** |      | -9.34*** |      | -12.66*** |      | -14.41*** |      | -7.53*** |      |

**Random Draw 7**

| Pathogen Type                                      | All      |      | Zoonotic:<br>wildlife |      | Zoonotic: non-<br>wildlife |      | Drug-resistant |      | Vector-borne |      |
|----------------------------------------------------|----------|------|-----------------------|------|----------------------------|------|----------------|------|--------------|------|
| No. of EID event grid cells                        | 297      |      | 154                   |      | 52                         |      | 59             |      | 87           |      |
|                                                    | b        | B    | b                     | B    | b                          | B    | b              | B    | b            | B    |
| log(JID articles)                                  | 0.37***  | 1.43 | 0.37***               | 1.44 | 0.42***                    | 1.53 | 0.49***        | 1.64 | 0.17**       | 1.19 |
| log(Human Pop. Density) (Persons/km <sup>2</sup> ) | 0.69***  | 1.94 | 0.62***               | 1.86 | 0.95***                    | 2.58 | 1.27***        | 3.55 | 0.44***      | 1.55 |
| Human Pop. Growth                                  | 0.47*    | 1.52 | 0.22                  | 1.24 | 0.95*                      | 2.60 | 1.60***        | 4.93 | 0.12         | 1.13 |
| Latitude (decimal degrees)                         | 0.02**   | 1.02 | 0.02                  | 1.02 | 0.034*                     | 1.04 | 0.072***       | 1.08 | -0.002       | 1.00 |
| Rainfall (mm)                                      | 0.000**  | 1.00 | 0.000                 | 1.00 | 0.000                      | 1.00 | 0.000          | 1.00 | 0.000        | 1.00 |
| Wildlife Host Richness                             | 0.008*   | 1.01 | 0.01***               | 1.01 | -0.01                      | 0.99 | 0.016**        | 1.02 | 0.007*       | 1.01 |
| Constant                                           | -9.63*** |      | -9.58***              |      | -12.57***                  |      | -17.45***      |      | -8.10***     |      |

**Random Draw 8**

| Pathogen Type                                      | All      |      | Zoonotic:<br>wildlife |      | Zoonotic: non-<br>wildlife |      | Drug-resistant |      | Vector-borne |      |
|----------------------------------------------------|----------|------|-----------------------|------|----------------------------|------|----------------|------|--------------|------|
| No. of EID event grid cells                        | 288      |      | 150                   |      | 49                         |      | 59             |      | 83           |      |
|                                                    | b        | B    | b                     | B    | b                          | B    | b              | B    | b            | B    |
| log(JID articles)                                  | 0.37***  | 1.44 | 0.36***               | 1.43 | 0.43***                    | 1.54 | 0.51***        | 1.67 | 0.20***      | 1.22 |
| log(Human Pop. Density) (Persons/km <sup>2</sup> ) | 0.66***  | 1.93 | 0.59***               | 1.80 | 0.97***                    | 2.65 | 1.16***        | 3.18 | 0.45***      | 1.57 |
| Human Pop. Growth                                  | 0.62***  | 1.86 | 0.47*                 | 1.56 | 1.23**                     | 3.43 | 1.27***        | 3.56 | 0.07         | 1.07 |
| Latitude (decimal degrees)                         | 0.01*    | 1.01 | 0.015                 | 1.02 | 0.033                      | 1.03 | 0.05**         | 1.05 | -0.008       | 0.99 |
| Rainfall (mm)                                      | 0.000**  | 1.00 | 0.000                 | 1.00 | 0.000                      | 1.00 | 0.000*         | 1.00 | 0.000        | 1.00 |
| Wildlife Host Richness                             | 0.003    | 1.00 | 0.009**               | 1.01 | -0.009                     | 0.99 | 0.004          | 1.00 | 0.005        | 1.00 |
| Constant                                           | -8.99*** |      | -9.54***              |      | -12.89***                  |      | -15.44***      |      | -7.87***     |      |

**Random Draw 9**

| Pathogen Type               | All |   | Zoonotic:<br>wildlife |   | Zoonotic: non-<br>wildlife |   | Drug-resistant |   | Vector-borne |   |
|-----------------------------|-----|---|-----------------------|---|----------------------------|---|----------------|---|--------------|---|
| No. of EID event grid cells | 289 |   | 151                   |   | 50                         |   | 62             |   | 86           |   |
|                             | b   | B | b                     | B | b                          | B | b              | B | b            | B |

|                                                    |          |      |          |      |           |      |           |      |          |      |
|----------------------------------------------------|----------|------|----------|------|-----------|------|-----------|------|----------|------|
| log(JID articles)                                  | 0.36***  | 1.43 | 0.36***  | 1.43 | 0.44***   | 1.55 | 0.46***   | 1.58 | 0.19**   | 1.20 |
| log(Human Pop. Density) (Persons/km <sup>2</sup> ) | 0.68***  | 1.97 | 0.60***  | 1.83 | 1.06***   | 2.88 | 1.06***   | 2.90 | 0.49***  | 1.63 |
| Human Pop. Growth                                  | 0.51**   | 1.66 | 0.33     | 1.40 | 0.92*     | 2.52 | 1.21***   | 3.35 | -0.077   | 0.93 |
| Latitude (decimal degrees)                         | 0.02*    | 1.02 | 0.015    | 1.02 | 0.026     | 1.03 | 0.004**   | 1.05 | -0.013   | 0.99 |
| Rainfall (mm)                                      | 0.000*   | 1.00 | 0.000    | 1.00 | 0.000     | 1.00 | 0.000     | 1.00 | 0.000    | 1.00 |
| Wildlife Host Richness                             | 0.005*   | 1.01 | 0.01***  | 1.01 | -0.013    | 0.99 | 0.049     | 1.01 | 0.005    | 1.01 |
| Constant                                           | -9.12*** |      | -9.59*** |      | -12.66*** |      | -14.47*** |      | -7.65*** |      |

**Random Draw 10**

| Pathogen Type                                      | All      |      | Zoonotic:<br>wildlife |      | Zoonotic: non-<br>wildlife |      | Drug-resistant |      | Vector-borne |      |
|----------------------------------------------------|----------|------|-----------------------|------|----------------------------|------|----------------|------|--------------|------|
|                                                    | 295      |      | 155                   |      | 51                         |      | 62             |      | 88           |      |
| No. of EID event grid cells                        | b        | B    | b                     | B    | b                          | B    | b              | B    | b            | B    |
| log(JID articles)                                  | 0.36***  | 1.41 | 0.35***               | 1.42 | 0.47***                    | 1.60 | 0.50***        | 1.66 | 0.20***      | 1.22 |
| log(Human Pop. Density) (Persons/km <sup>2</sup> ) | 0.66***  | 1.99 | 0.59***               | 1.80 | 1.06***                    | 2.89 | 1.15***        | 3.15 | 0.41***      | 1.51 |
| Human Pop. Growth                                  | 0.51**   | 1.53 | 0.14                  | 1.15 | 0.95*                      | 2.58 | 1.70***        | 5.45 | 0.29         | 1.34 |
| Latitude (decimal degrees)                         | 0.02*    | 1.01 | 0.012                 | 1.01 | 0.029                      | 1.03 | 0.053**        | 1.05 | -0.011       | 0.99 |
| Rainfall (mm)                                      | 0.000*   | 1.00 | 0.000                 | 1.00 | 0.000                      | 1.00 | 0.001*         | 1.00 | 0.000        | 1.00 |
| Wildlife Host Richness                             | 0.005*   | 1.00 | 0.009**               | 1.01 | -0.008                     | 0.99 | 0.005          | 1.01 | 0.004        | 1.00 |
| Constant                                           | -9.07*** |      | -9.20***              |      | -13.29***                  |      | -15.64***      |      | -7.58***     |      |

**Socio-economic, environmental and ecological correlates of EID events for 10 random spatial draws.** Columns represent multivariable logistic regressions for all EID events and then split according to the type of pathogen responsible for the EID event. b represents the regression coefficient and B, the odds ratio for the independent variables in the model and \*\*\*  $p < 0.001$ , \*\*  $p < 0.01$ , and \*  $p < 0.05$ .



## 5. Supplementary Figure 3.

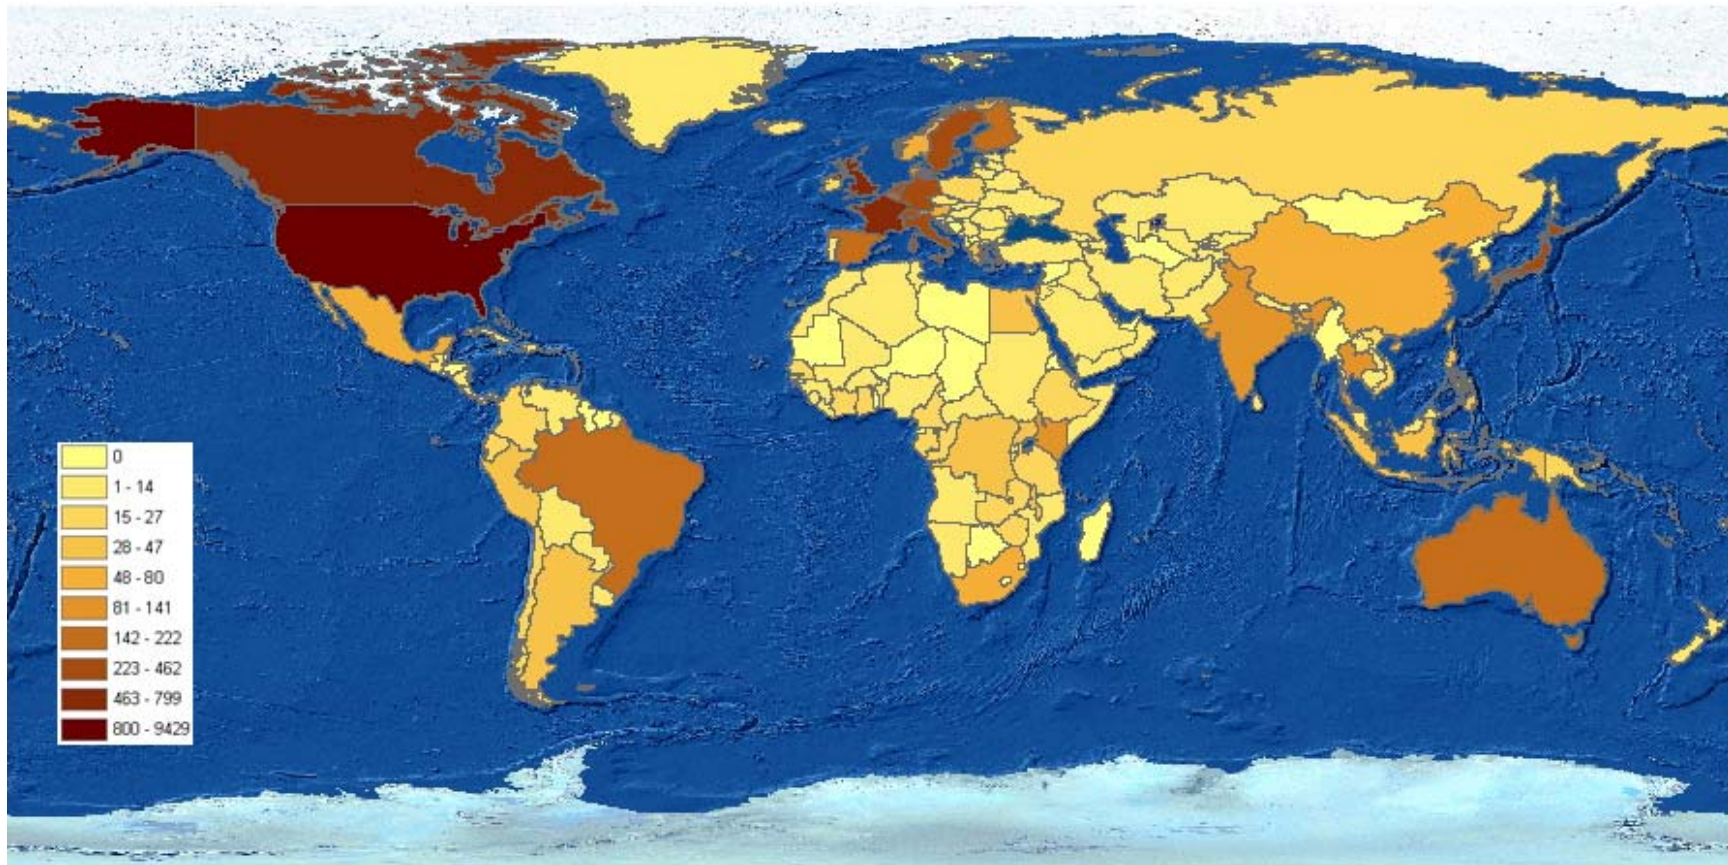

**Spatial reporting bias in EID events.** The frequency of the country listed as the address for authors in each article in the Journal of Infectious Diseases from 1973.
